# Supplementary material for: Spatial transcriptomics reveals substantial heterogeneity in triple-negative breast cancer with potential clinical implications
Source: PubMed Central journal article supplement — Nat Commun. 2024 Nov 26;15:10232. doi: 10.1038/s41467-024-54145-w (PMC11599601; doi:10.1038/s41467-024-54145-w), 2024-11-26
Supplement: 41467_2024_54145_MOESM1_ESM.pdf [file 41467_2024_54145_MOESM1_ESM.pdf]

# **Supplementary Information**

## **Spatial transcriptomics reveals substantial heterogeneity in triple negative breast cancer with potential clinical implications**

### **Authors:**

Xiaoxiao Wang<sup>1,2</sup>, David Venet<sup>1</sup>, Frédéric Lifrange<sup>3</sup>, Denis Larsimon<sup>4</sup>, Mattia Rediti<sup>1</sup>, Linnea Stenbeck<sup>5</sup>, Floriane Dupont<sup>1</sup>, Ghizlane Rouas<sup>1</sup>, Andrea Joaquin Garcia<sup>1</sup>, Ligia Craciun<sup>4</sup>, Laurence Buisseret<sup>1,2</sup>, Michail Ignatiadis<sup>1,2</sup>, Marcela Carausu<sup>1</sup>, Nayanika Bhalla<sup>5</sup>, Yuvarani Masarapu<sup>5</sup>, Eva Gracia Villacampa<sup>5</sup>, Lovisa Franzén<sup>5</sup>, Sami Saarenpää<sup>5</sup>, Linda Kvastad<sup>5</sup>, Kim Thrane<sup>5</sup>, Joakim Lundeberg<sup>5</sup>, Françoise Rothé<sup>1</sup> and Christos Sotiriou<sup>1,2</sup>

### **Affiliations:**

<sup>1</sup>Breast Cancer Translational Research Laboratory J-C Heuson, Institut Jules Bordet, Université Libre de Bruxelles, Hôpital Universitaire de Bruxelles, Brussels, Belgium

<sup>2</sup>Medical Oncology Department, Institut Jules Bordet, Université Libre de Bruxelles, Hôpital Universitaire de Bruxelles, Brussels, Belgium

<sup>3</sup>Department of Pathology, University Hospital Center of Liège, Liège, Belgium

<sup>4</sup>Department of Pathology, Institut Jules Bordet, Université Libre de Bruxelles, Hôpital Universitaire de Bruxelles, Brussels, Belgium

<sup>5</sup>Department of Gene Technology, KTH Royal Institute of Technology, Stockholm, Sweden

### **This file contains:**

**-All Supplementary Figures (1 to 33)**

**-All Supplementary Tables (1 to 16)**

# SUPPLEMENTARY FIGURES

## Supplementary Figure 1

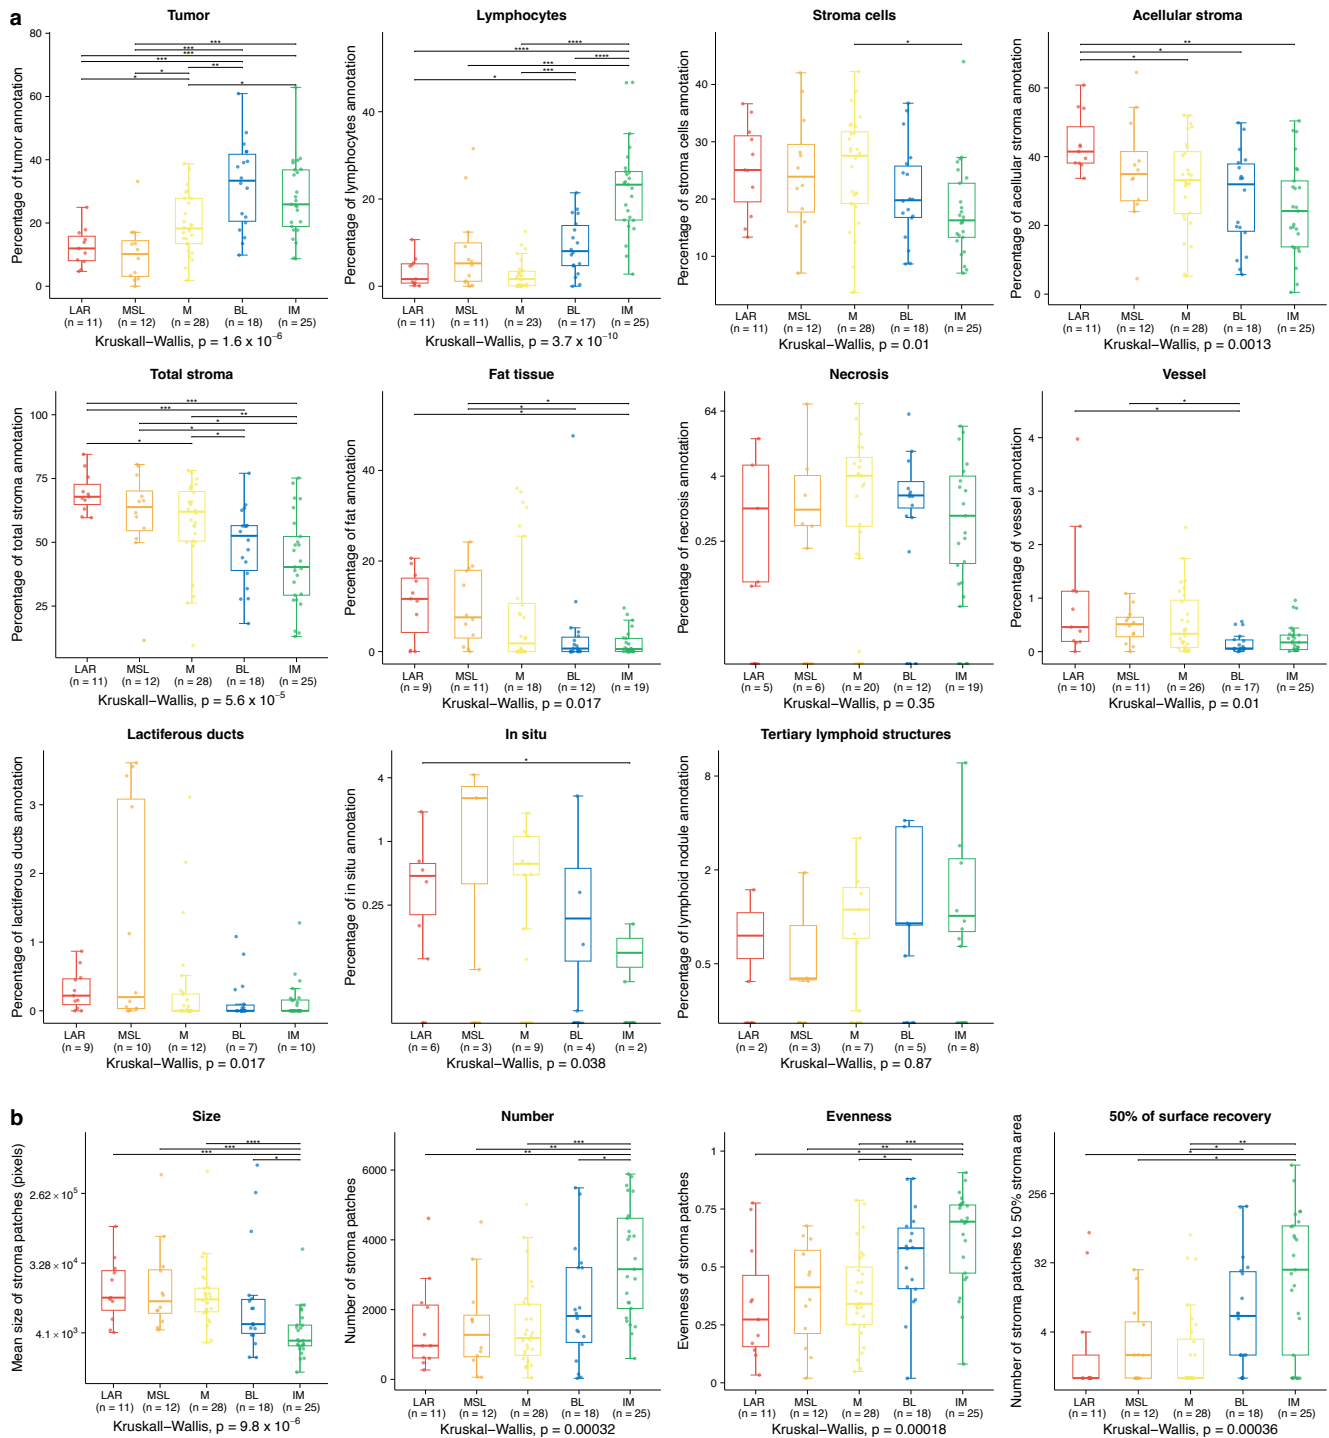

### Distribution of morphological annotations (a) and characteristics of stroma patches (b) across the five TNBC molecular subtypes in the ST TNBC cohort ( $N = 94$ ).

Statistical differences across subtypes were assessed using Kruskal-Wallis tests and Wilcoxon rank sum tests (when comparing each subtype against each one of the others). For Wilcoxon tests, FDRs were obtained by adjusting two-sided P values using Benjamini & Hochberg method. FDRs  $< 0.05$  are shown. In the panels: \*FDR  $< 0.05$  and  $\geq 0.01$ ; \*\*FDR  $< 0.01$  and  $\geq 0.001$ ; \*\*\*FDR  $< 0.001$  and  $\geq 0.0001$ ; \*\*\*\*FDR  $< 0.0001$ . In boxplots, the boxes are defined by the upper and lower quartile; the median is shown as a bold colored horizontal line; whiskers extend to the most extreme data point which is no more than 1.5 times the interquartile range from the box. TNBC molecular subtypes are computed on the ST global PB. The number under each TNBC molecular subtype refers to the

number of samples with the presence of a morphological annotation or stroma patches-related metrics.

Source data and exact P values are provided as a Source Data file.

BL: basal-like; IM: immunomodulatory; LAR: luminal androgen receptor; M: mesenchymal; MSL: mesenchymal stem-like.

## Supplementary Figure 2

**a**

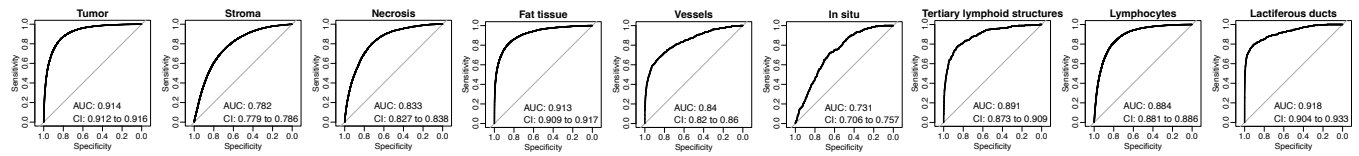

**b**

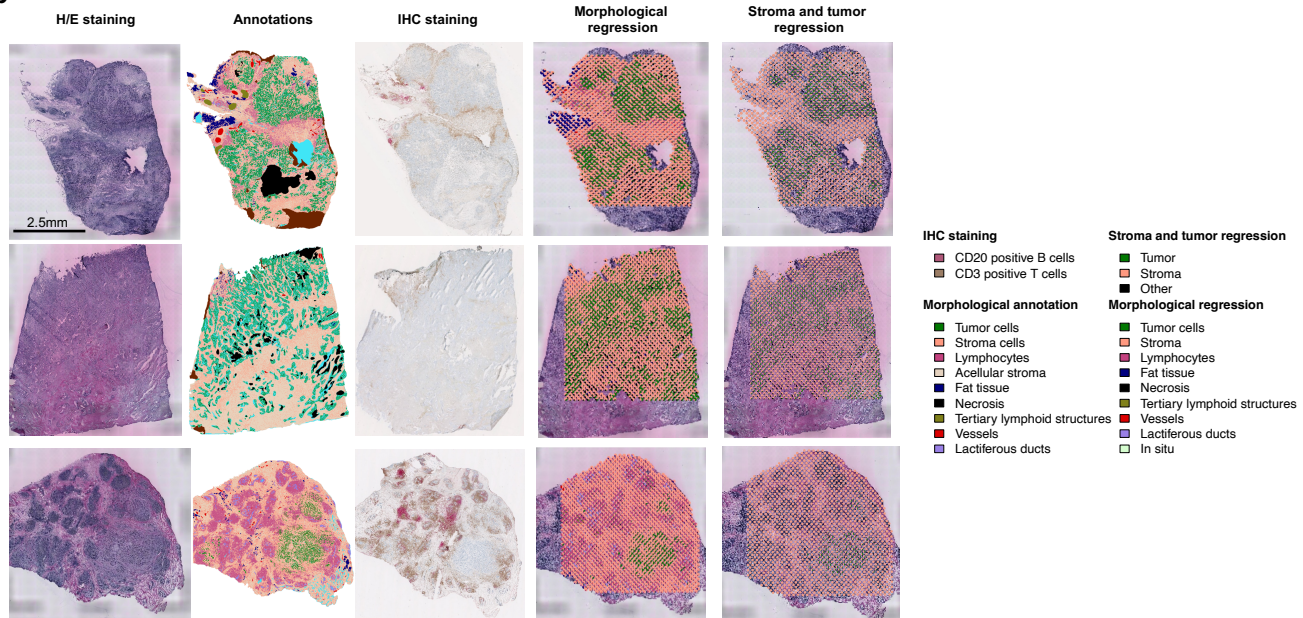

### Morphological regression and deconvolution of gene expression of the nine histomorphological categories.

**a** Areas Under the Curve (AUCs) for the prediction of each histomorphological category (binarized as present in a spot if proportion > 25%) by the regressor. Confidence intervals (CI) for the AUC of each histomorphological category are reported.

**b** Visualization of three illustrative TNBC samples by different methods: ST-associated H/E image, morphological annotation of the ST-associated H/E image, double CD3/CD20 IHC staining, and projections of all histomorphological or stroma/tumor compartments derived from ST expression-based per-spot regression.

Source data are provided as a Source Data file.

AUC: area under the curve; H/E: hematoxylin-eosin; IHC: immunohistochemistry.

## Supplementary Figure 3

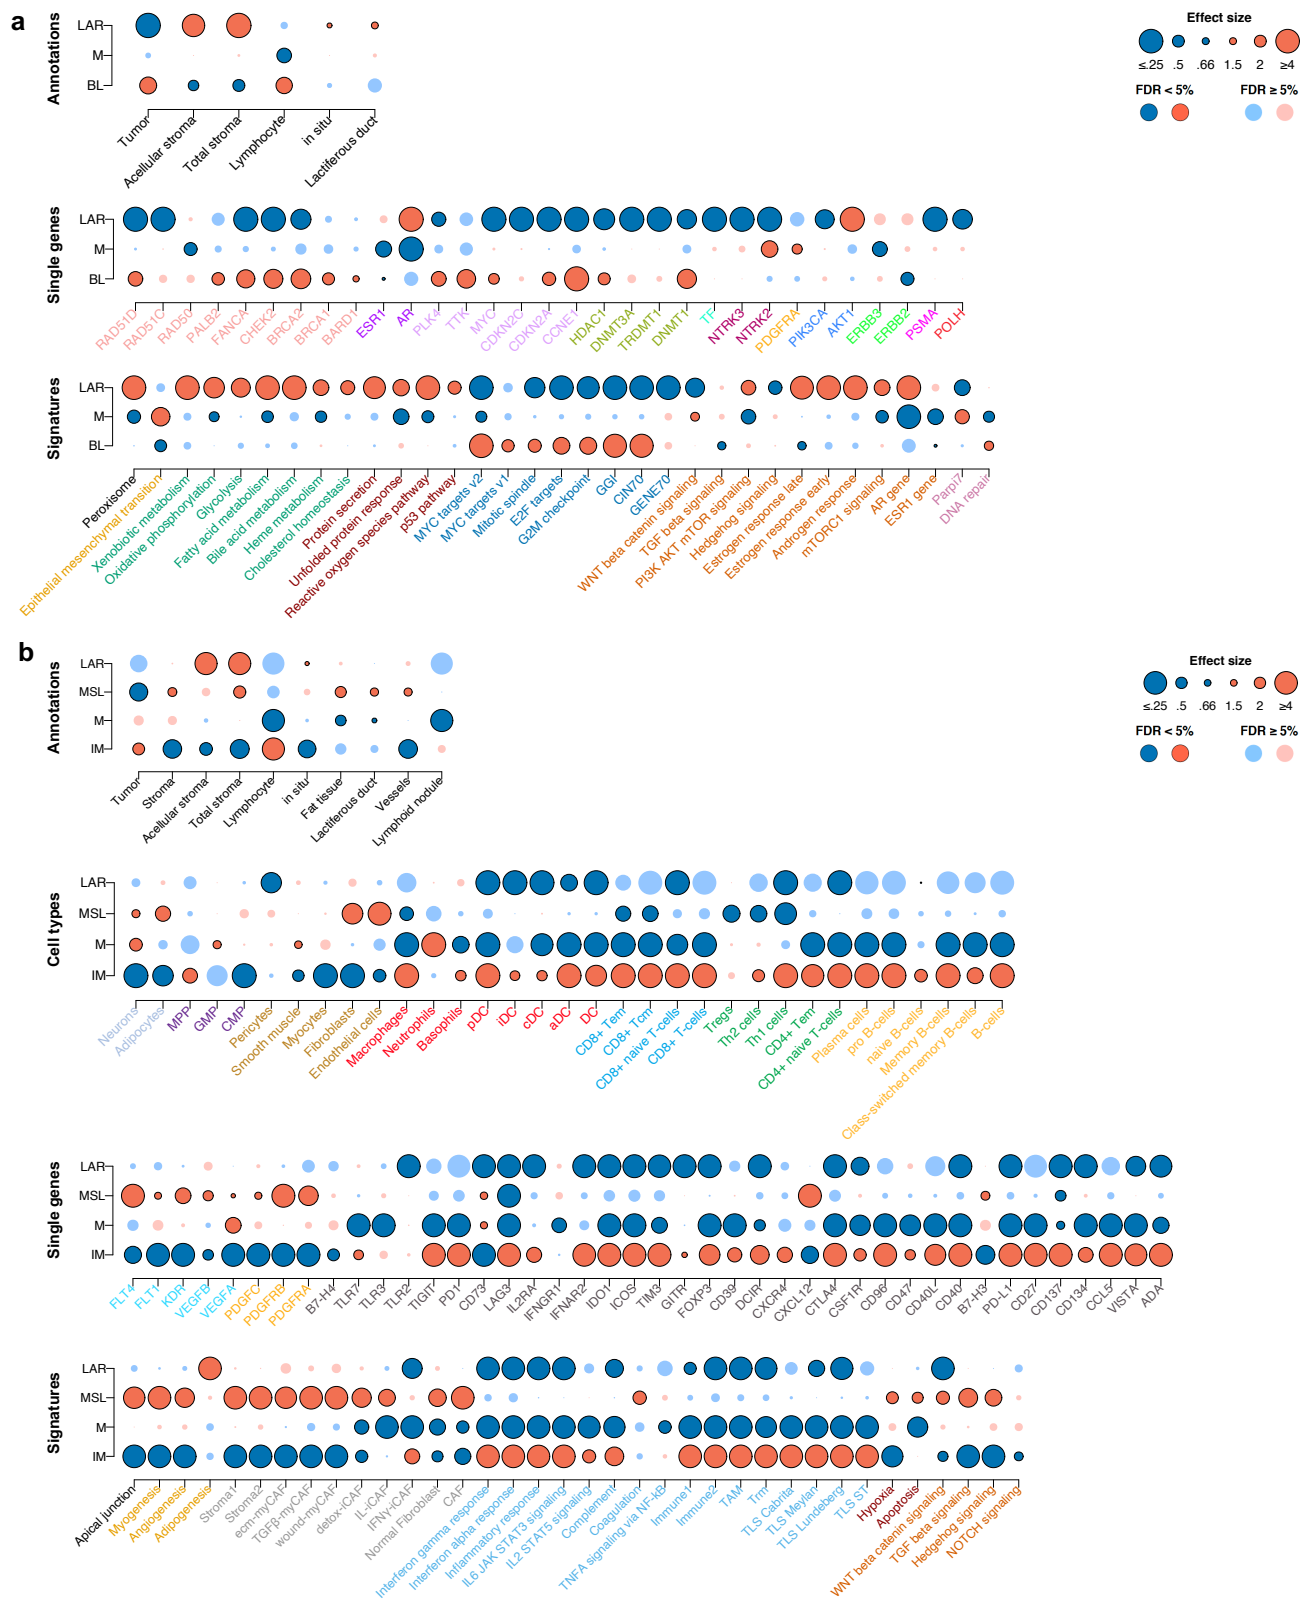

### Molecular and cellular characterization of stroma and tumor compartments computed on the deconvoluted pseudobulk in the ST TNBC cohort (N = 94).

**a** Associations between TNBC molecular subtypes computed on tumor pseudobulk and different tumor specific features: morphological annotations, expression of single genes of interest and expression-based signatures.

**b** Associations between TNBC molecular subtypes computed on stroma pseudobulk and different stroma specific features: morphological annotations, cell type enrichment scores by xCell, expression of single genes of interest and expression-based signatures. A logistic regression model

was used to evaluate associations between each feature and each subtype. Two-sided P values were obtained from Wilcoxon rank sum tests and corrected for multi testing. Dots are bordered and dark-colored when FDRs < 0.05, compared to lighter-colored dots when FDRs  $\geq$  0.05. Negative and positive associations are represented in blue and red, respectively. Source data are provided as a Source Data file.

aDC: activated dendritic cells; AR: androgen receptor; AUC: Areas under the curve; BL: basal-like; cDC: conventional dendritic cells; DC: dendritic cells; GMP: granulocyte-macrophage progenitor; HE: hematoxylin and eosin; iDC: immature dendritic cells; IHC: immunohistochemistry; IM: immunomodulatory; LAR: luminal androgen receptor; M: mesenchymal; MPP: multipotent progenitor; MSC: mesenchymal stem cell; MSL: mesenchymal stem-like; pDC: plasmacytoid dendritic cells; sTILs: stromal tumor infiltrating lymphocytes; Tcm: central memory T cells; Tem: effector memory T cells; Th1: T helper 1; Th2: T helper 2; Tregs: regulatory T cells.

## Supplementary Figure 4

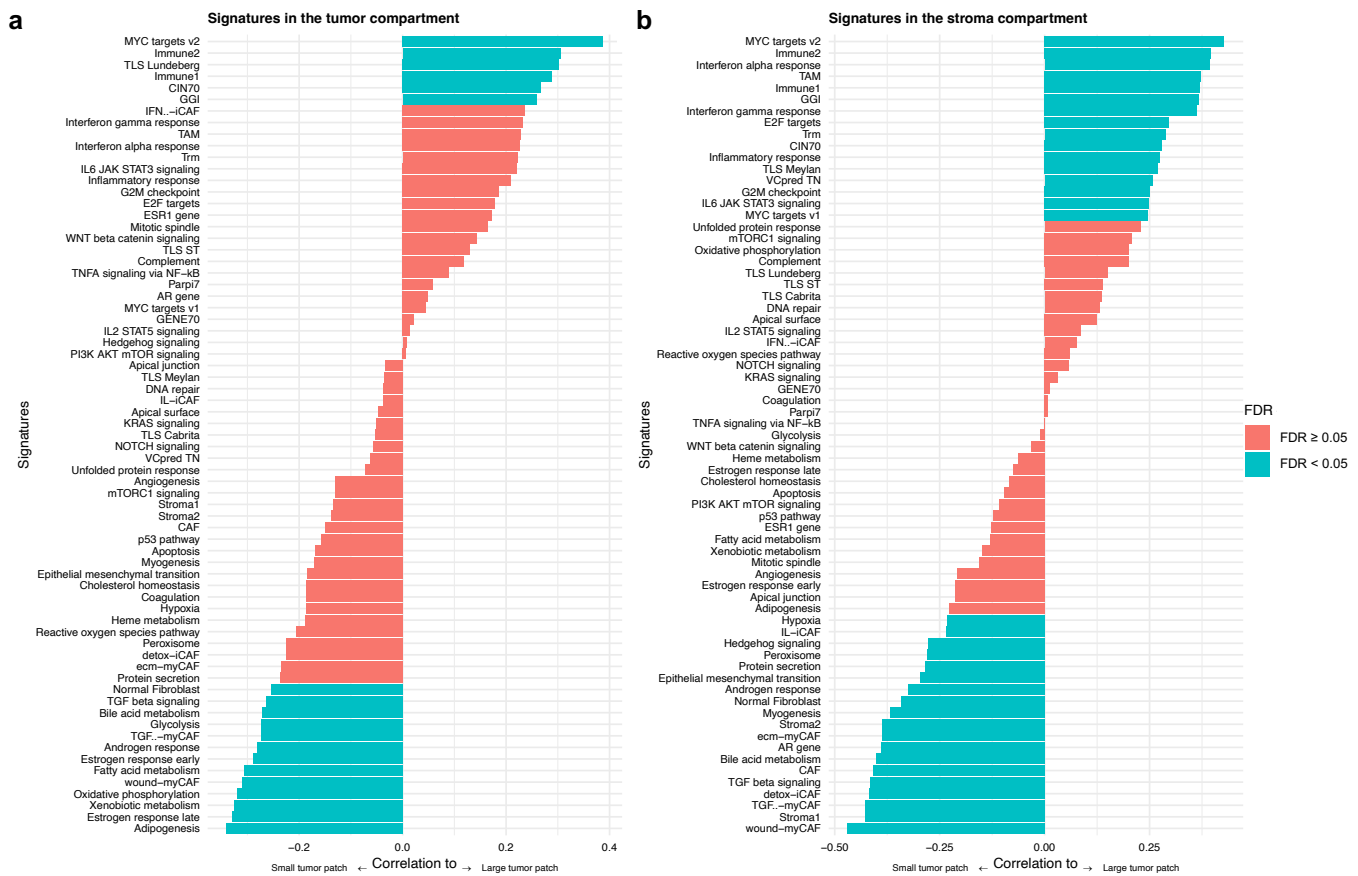

### Molecular characterization of tumor and stroma compartments in correlation with the size of tumor patches in the ST TNBC cohort ( $N = 94$ ).

**a** Association of the mean size of tumor patches with different expression-based signatures computed in the tumor compartment pseudobulk.

**b** Association of the mean size of tumor patches with different expression-based signatures computed in the stroma compartment pseudobulk. Barplots are ranked by Spearman's Rho coefficient values and colored by the corresponding FDRs (blue: < 0.05; red:  $\geq$  0.05). Positive correlation indicates association to larger patches and negative correlation indicates association to smaller patches.

Source data are provided as a Source Data file.

CAF: cancer associated fibroblast S1; FDR: false-discovery rate; GGI: genomic grade index; IL2: interleukin 2; IL6: interleukin 6; Parpi7: parp inhibitor 7; TAM: tumor associated macrophages; TLS: tertiary lymphoid structure; TNFA: tumor necrosis factor alpha; Trm: tissue-resident memory T cell; VCpredTN: veliparib carboplatin prediction triple negative.

## Supplementary Figure 5

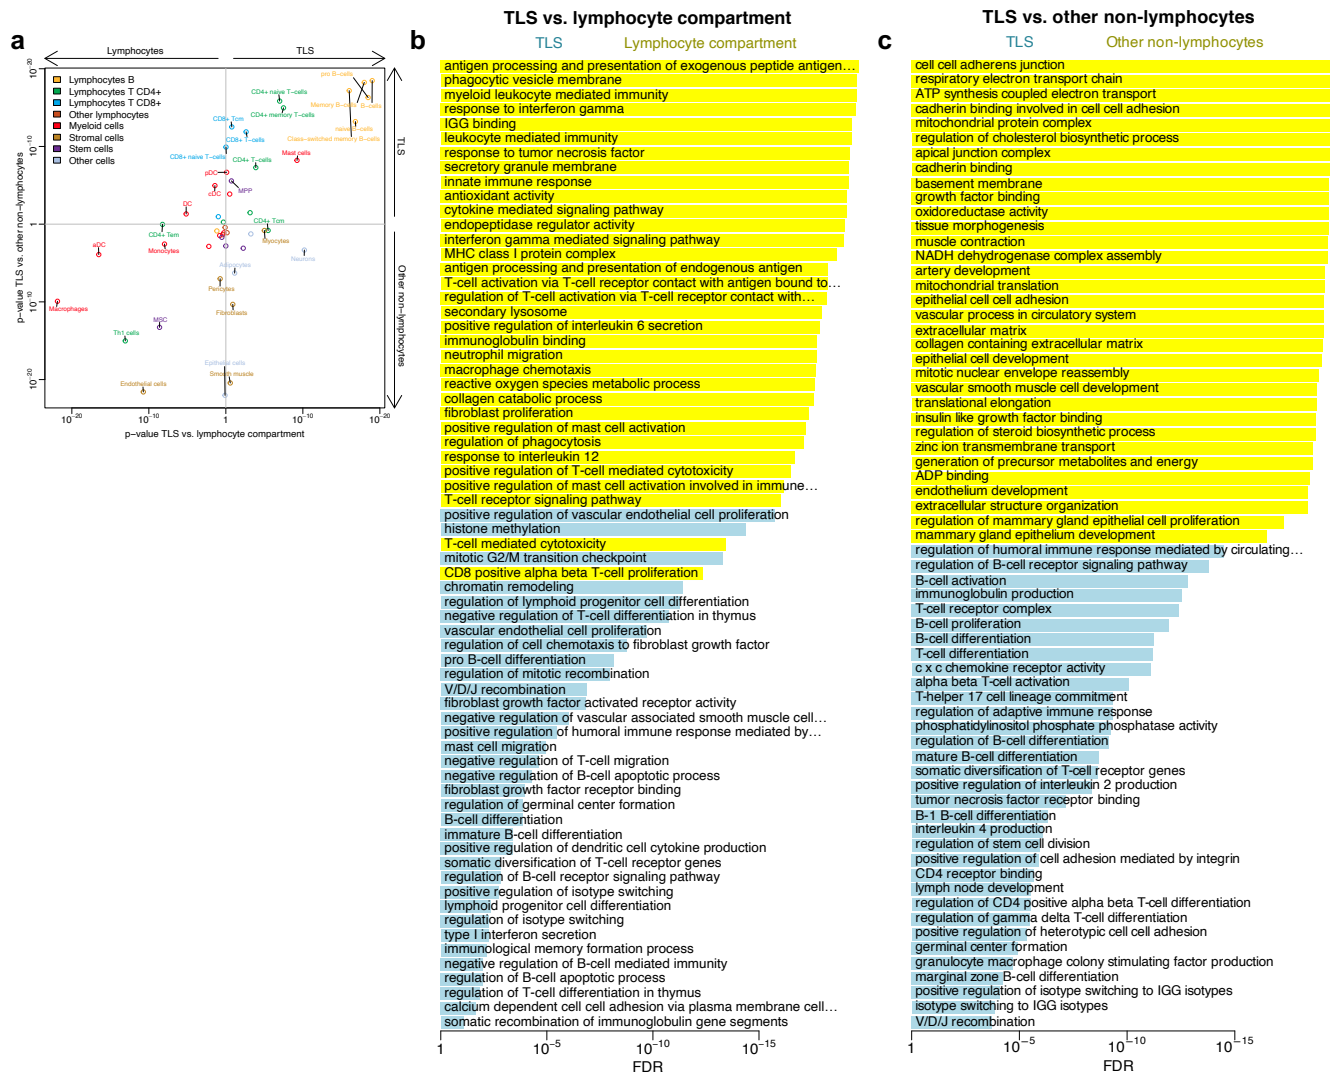

## Cellular and molecular characterization of tertiary lymphoid structures in the ST TNBC cohort (N = 94).

**a** Distribution of cell type enrichment scores by xCell specific to TLS compartment compared to lymphocytes (x-axis) and compared to other non-lymphocytes compartments (y-axis).

**b** Selected list of the most differentially expressed biological pathways assessed using GO: BP between TLS and lymphocyte compartments. Blue and yellow bars referred to processes enriched in the TLS and lymphocytes compartments, respectively.

**c** Selected list of the most differentially expressed biological pathways assessed using GO: BP between TLS and other non-lymphocytes compartments. Blue and yellow bars refer to processes enriched in the TLS and other non-lymphocytes compartments, respectively. Statistical differences were assessed using one-sided Wilcoxon rank sum test. All comparisons shown are significant with FDRs < 0.05.

Source data are provided as a Source Data file.

aDC: activated dendritic cells; cDC: conventional dendritic cells; DC: dendritic cells; GO:BP: Gene Ontology—Biological Processes; iDC: immature dendritic cells; MDSC: myeloid-derived suppressor cells; MPP: multipotent progenitor; MSC: mesenchymal stem cell; pDC: plasmacytoid dendritic cells; Tcm: central memory T cells; Tem: effector memory T cells; Th1: type 1 helper; Th2: T helper 2; Tregs: regulatory T cells; TLS: tertiary lymphoid structure.



## Supplementary Figure 6

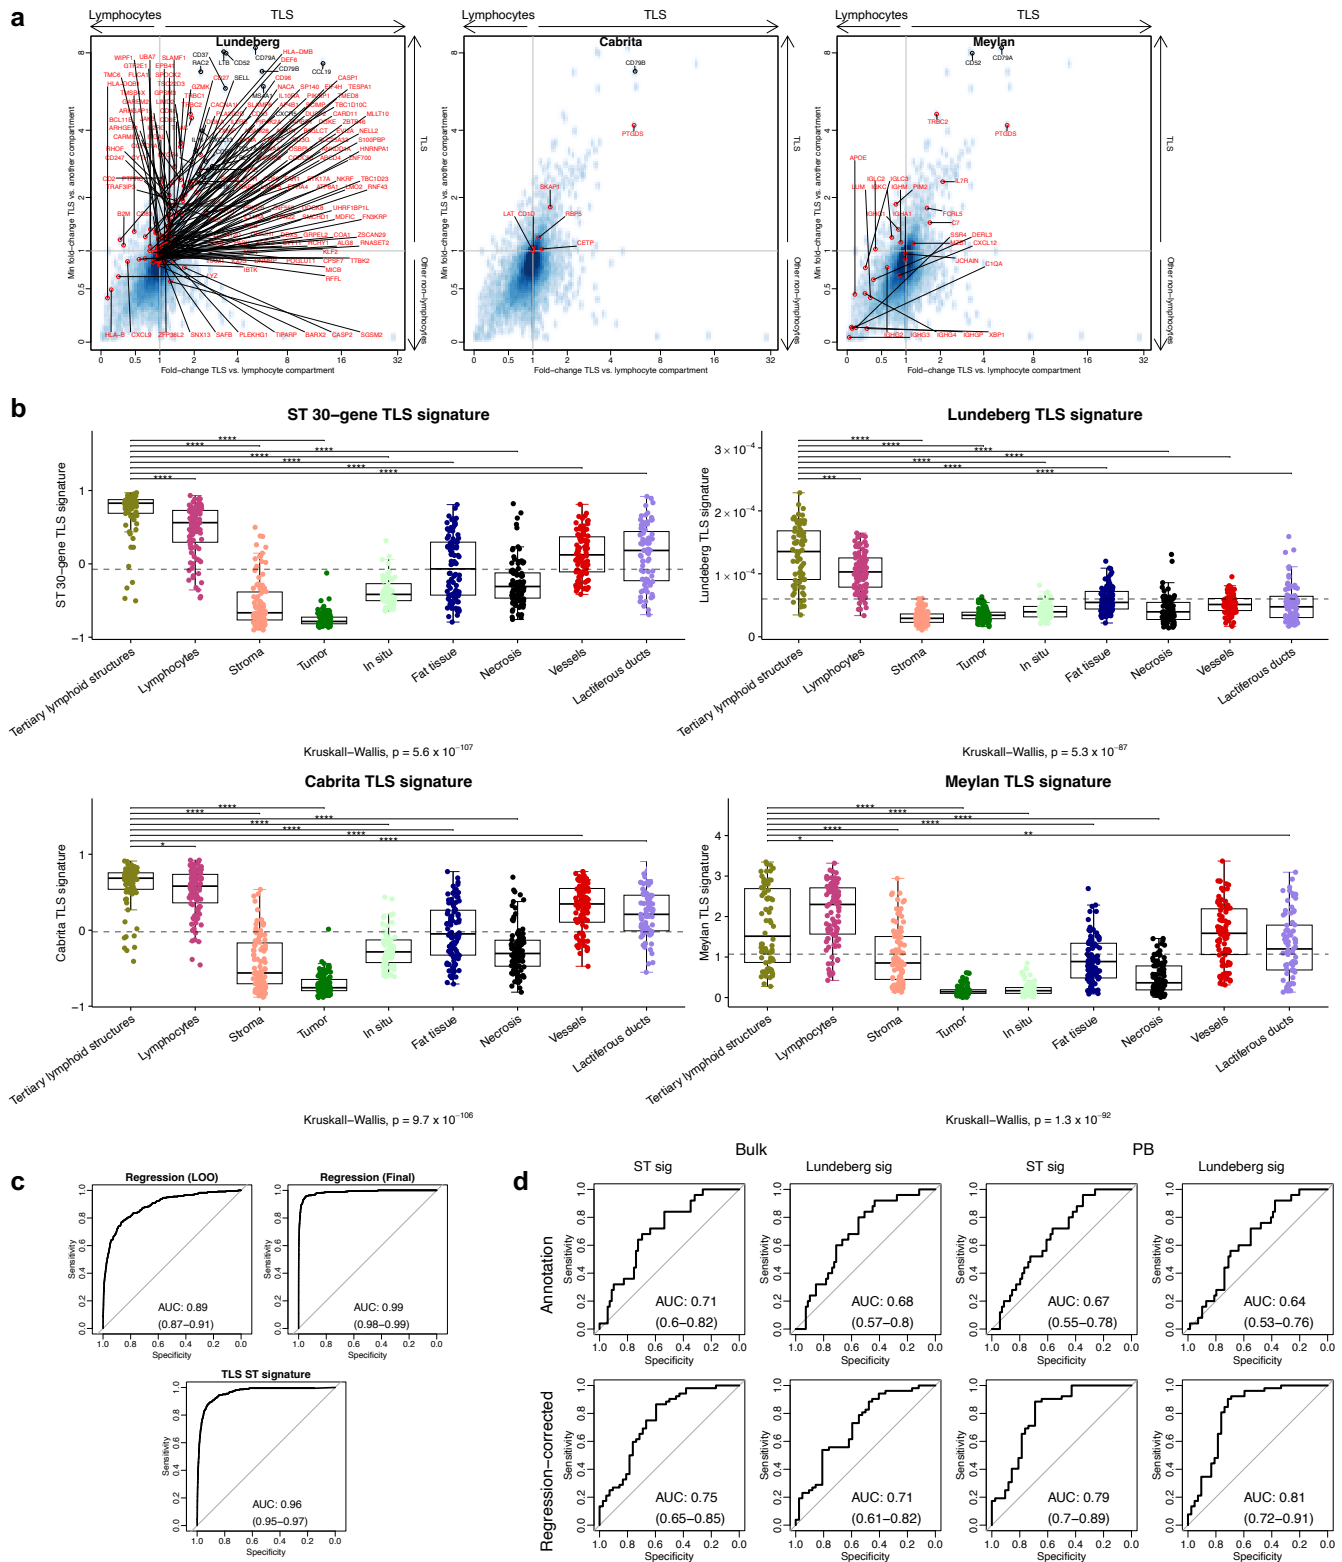

### Morphological and molecular significance of 30-genes TLS ST signature and comparison with other TLS signatures.

**a** Relative expression of each gene in the TLS compartment compared to the lymphocyte compartment (x-axis) or other compartments (y-axis) in the ST TNBC cohort ( $N = 94$ ). Each panel highlights genes from a published TLS signature<sup>1–3</sup> with shared genes with our signature in black and those exclusive to the referenced signature in red.

**b** Distribution of the expression of various TLS signatures across the nine histomorphological compartments in the ST TNBC cohort. Statistical differences across compartments were assessed using Kruskal-Wallis test and Wilcoxon rank sum test (when comparing each compartment to each

of the others). For Wilcoxon tests, FDRs were obtained by adjusting two-sided P values using Benjamini & Hochberg method (\*FDR < 0.05 and  $\geq 0.01$ ; \*\*FDR < 0.01 and  $\geq 0.001$ ; \*\*\*FDR < 0.001 and  $\geq 0.0001$ ; \*\*\*\*FDR < 0.0001). Only the significant FDRs for paired comparisons to TLS are shown. In boxplots, the boxes are defined by the upper and lower quartile; the median is shown as a bold black horizontal line; whiskers extend to the most extreme data point which is no more than 1.5 times the interquartile range from the box. The dashed horizontal line represents the mean TLS signature across the entire cohort.

**c** AUCs for the prediction of the TLS, using the regressor in a leave-a-patient-out cross-validation (top left), the final regressor computed by using all data (top right) and the 30-gene TLS ST signature (bottom). Spots with TLS as at least 25% of their morphological annotation were binarized as presence of TLS.

**d** Comparison of AUCs of our TLS ST (ST sig) and Lundeberg's TLS (Lundeberg sig) signatures computed on the RNA bulk-seq (Bulk) and on the ST global pseudobulk (PB) of the ST TNBC cohort to predict the presence of TLS identified by morphological annotation and by the morphological regressor.

Source data and exact P values are provided as a Source Data file.

AUC: area under the curve; LOO: leave-one-out; PB: pseudobulk; ST: spatial transcriptomics; TLS: tertiary lymphoid structure

## Supplementary Figure 7

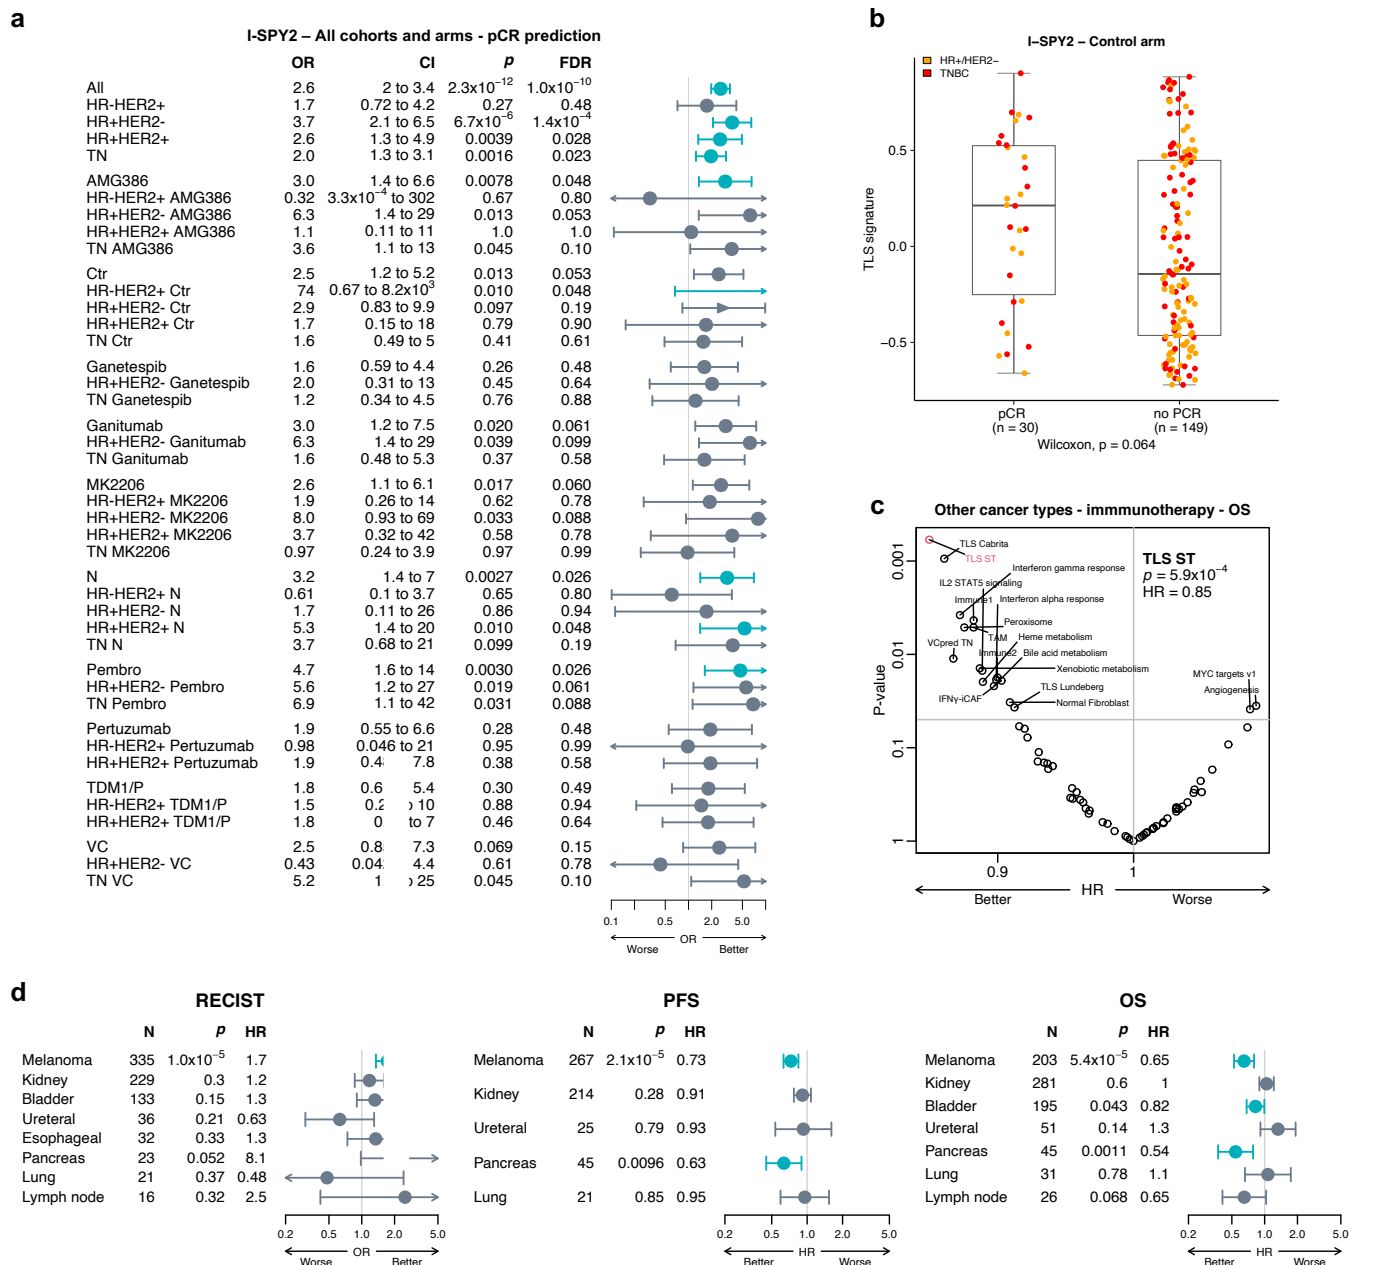

**Clinical values of 30-gene TLS ST signature in the I-SPY2 trial and in the metastatic non-breast cancers undergoing treatment with immune checkpoint blockades.**

**a** Prediction of pCR by the TLS ST signature in the I-SPY2 trial<sup>4</sup> ( $N = 987$ ), by BC subtypes and/or treatment arms, univariate analysis.

**b** TLS ST signature levels computed on the bulk RNA-seq data between no pCR and pCR patients in the control arm (treated by paclitaxel only) of the I-SPY2 trial ( $N = 179$ ). Two-sided P value was computed using Wilcoxon rank sum test. TNBC samples are represented by red dots, while HR+/HER2- samples are represented by orange dots.

**c** Volcano plot showing the predictive value of TLS ST signature compared to other existing signatures to predict OS in metastatic non-breast cancers undergoing treatment with immune checkpoint blockades<sup>5</sup> ( $N = 555$ ).

**d** Prediction of radiological response (RECIST;  $N = 842$ ) and survival outcomes (PFS;  $N = 572$  and OS;  $N = 856$ ) by the TLS ST signature computed on bulk RNA-seq data in metastatic non-breast cancers undergoing treatment with immune checkpoint blockades, univariate analysis.

Forest plots: P values were obtained by Wilcoxon rank sum tests, OR or HR by logistic regression. Non-significant FDRs  $\geq 0.05$  are shown in dark grey, significant FDRs are shown in blue ( $< 0.05$ ). Circles indicate OR or HR, and error bars the 95% confidence interval (95% CI). Source data are provided as a Source Data file.

CI: confidence interval; Ctr: control arm (paclitaxel); FDR: false-discovery rate; HR: hazard ratio; HR+/-: hormone receptor positive/negative; IFN $\gamma$ -iCAF: interferon gamma signaling pathway cancer associated fibroblast S1; N: neratinib; OR: odds ratio; pCR: pathological complete response; PFS: progression-free survival; OS: overall survival; RECIST: Response Evaluation Criteria in Solid Tumours; ST: spatial transcriptomics; TAM: tumor associated macrophages; TDM1/P: trastuzumab emtansine/ pertuzumab; TLS: tertiary lymphoid structures; TN or TNBC: triple negative breast cancer; VC: veliparib; VCpredTN: veliparib carboplatin prediction triple negative.

## Supplementary Figure 8

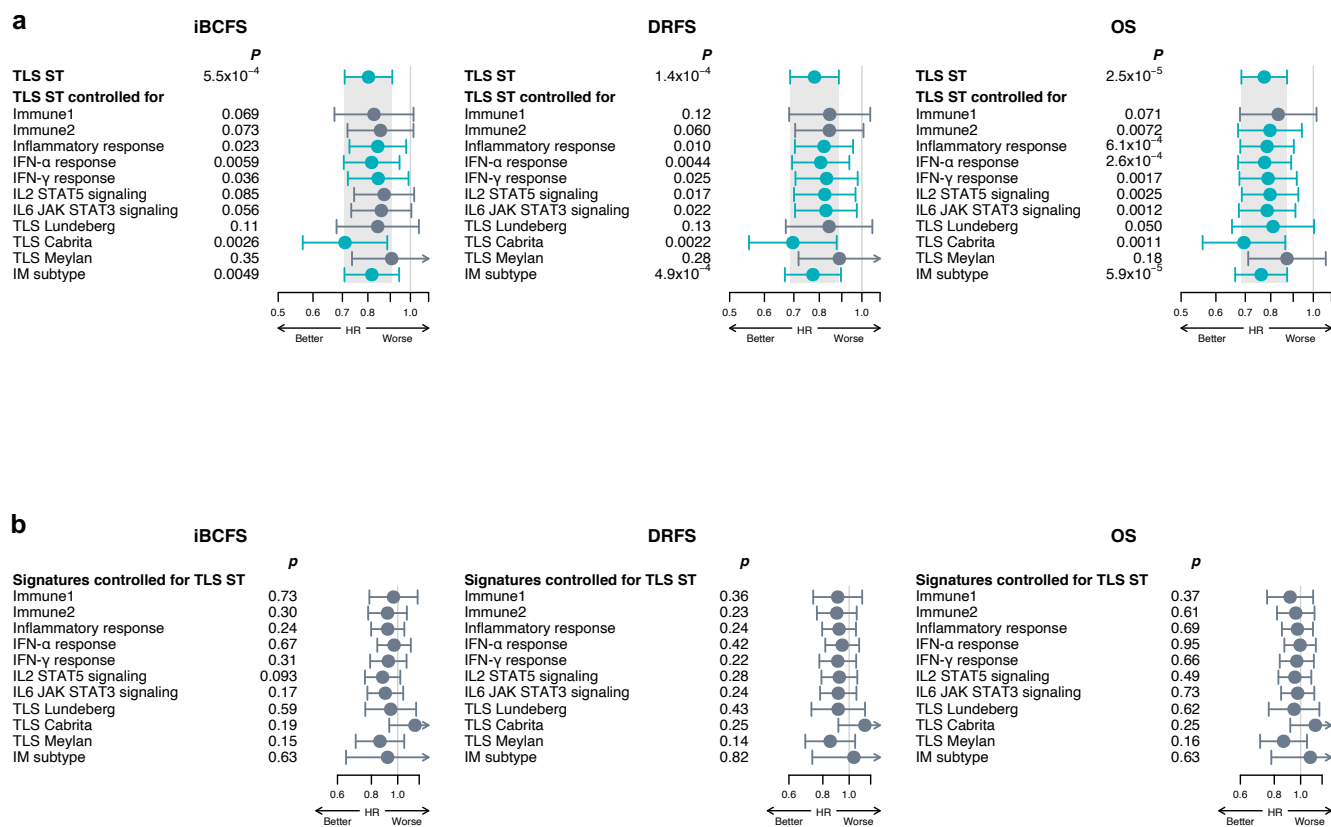

### Interaction between 30-gene TLS ST signature and other immune signatures for the prediction of survival outcomes in TNBC patients.

**a** Association between the TLS ST signature (before and after adjusting for various immune signatures) and the prediction for various survival outcomes in the merged TNBC cohorts (ST TNBC, METABRIC and SCAN-B)<sup>6,7</sup> ( $N = 1101$ ).

**b** Association between the various immune signatures and IM subtype after adjusting for TLS ST signature, and the prediction for various survival outcomes in the merged TNBC cohorts (ST TNBC, METABRIC and SCAN-B).

P values were obtained with a likelihood ratio test on nested models using the study ID as a strata, significant P values are shown in blue ( $< 0.05$ ). Circles indicate HR, and error bars the 95% confidence interval (95% CI).

Source data are provided as a Source Data file.

DRFS: distant relapse-free survival; HR: hazard ratio; IBCFS: invasive breast cancer-free survival; IM: immunomodulatory; OS: overall survival; ST: spatial transcriptomics; TLS: tertiary lymphoid structures.

## Supplementary Figure 9

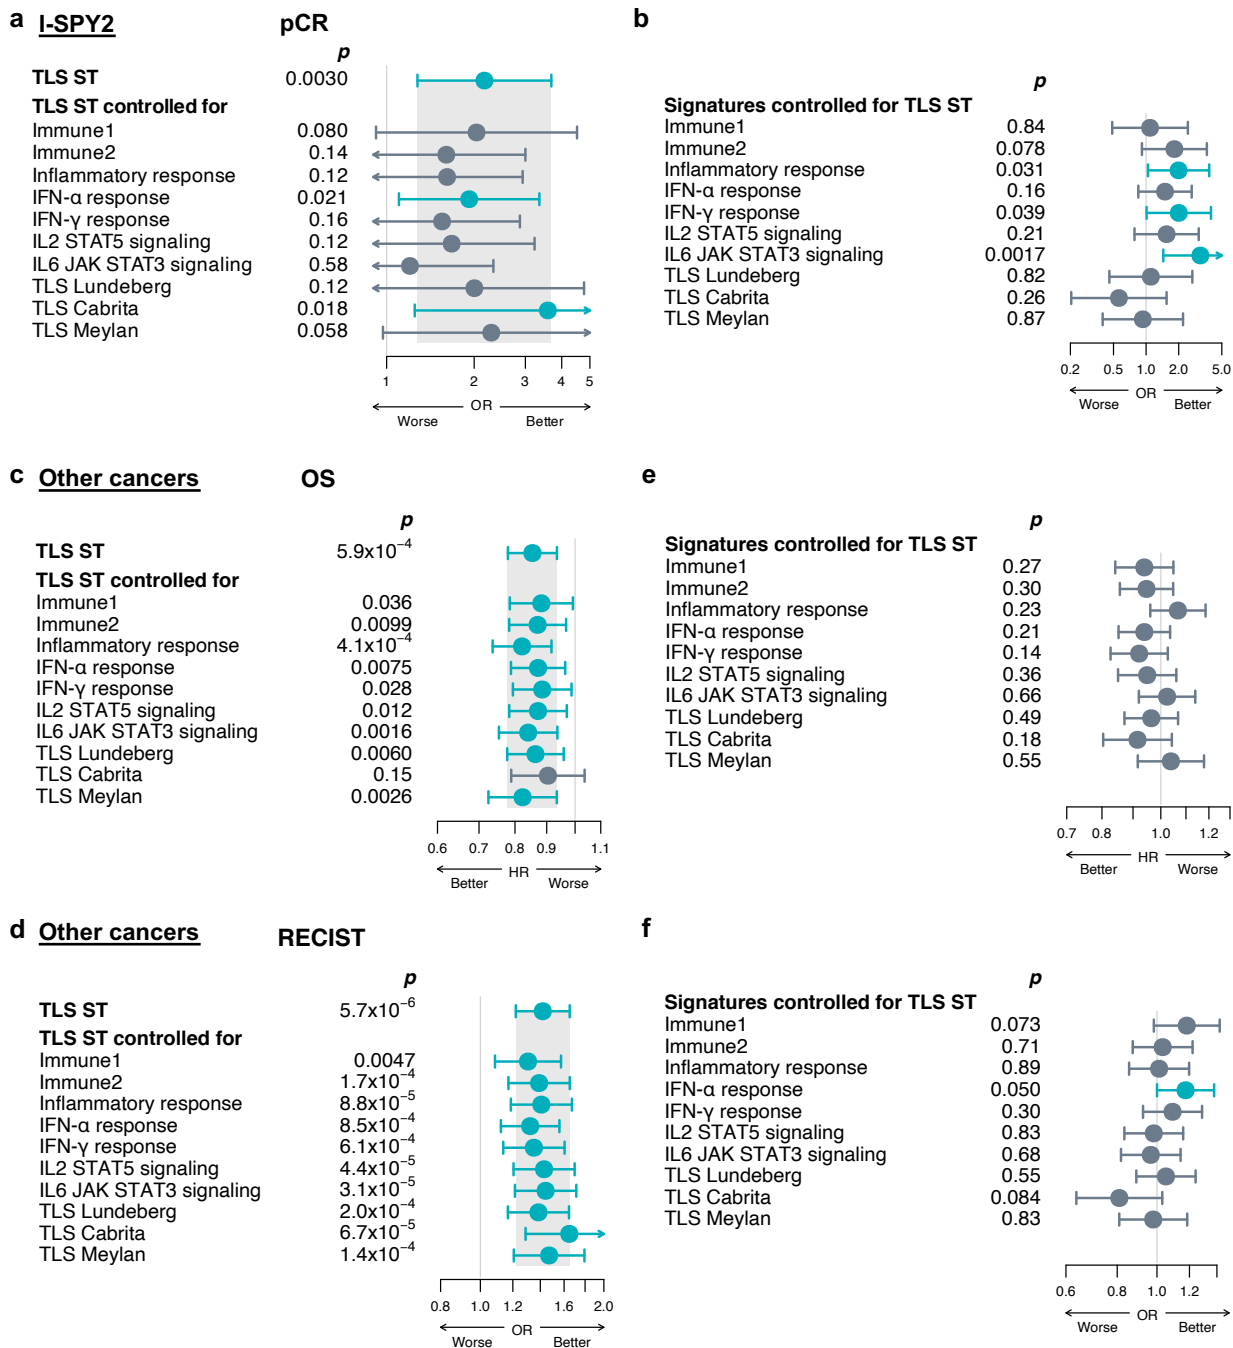

### Interaction between 30-gene TLS ST signature and other immune signatures for the prediction of therapeutic response or clinical outcome in other BC and non-BC datasets.

**a** Association between the TLS ST signature (before and after adjusting for various immune signatures) and the prediction for pCR in all BC subtypes patients treated with paclitaxel plus pembrolizumab in I-SPY2 trial ( $N = 69$ ).

**b** Association between the various immune signatures after adjusting for TLS ST signature, and the prediction for pCR in all BC subtypes patients treated with paclitaxel plus pembrolizumab in I-SPY2 trial.

**c,d** Association between the TLS ST signature (before and after adjusting for various immune signatures) and the prediction for OS ( $N = 856$ ) (**c**) and radiological response (RECIST) ( $N = 842$ ) (**d**) in metastatic non-breast cancers undergoing treatment with immune checkpoint inhibitors.

**e,f** Association between the various immune signatures after adjusting for TLS ST signature, and the prediction for OS (**e**) and radiological response (RECIST) (**f**) in metastatic non-breast cancers undergoing treatment with immune checkpoint inhibitors.

P values were obtained with a likelihood ratio test on nested models, significant P values are shown in blue (< 0.05). Circles indicate HR, and error bars the 95% confidence interval (95% CI). Source data are provided as a Source Data file.

HR: hazard ratio; OR: odds ratio; OS: overall survival; pCR: pathological complete response; RECIST: Response Evaluation Criteria in Solid Tumours; ST: spatial transcriptomics; TLS: tertiary lymphoid structures.

## Supplementary Figure 10

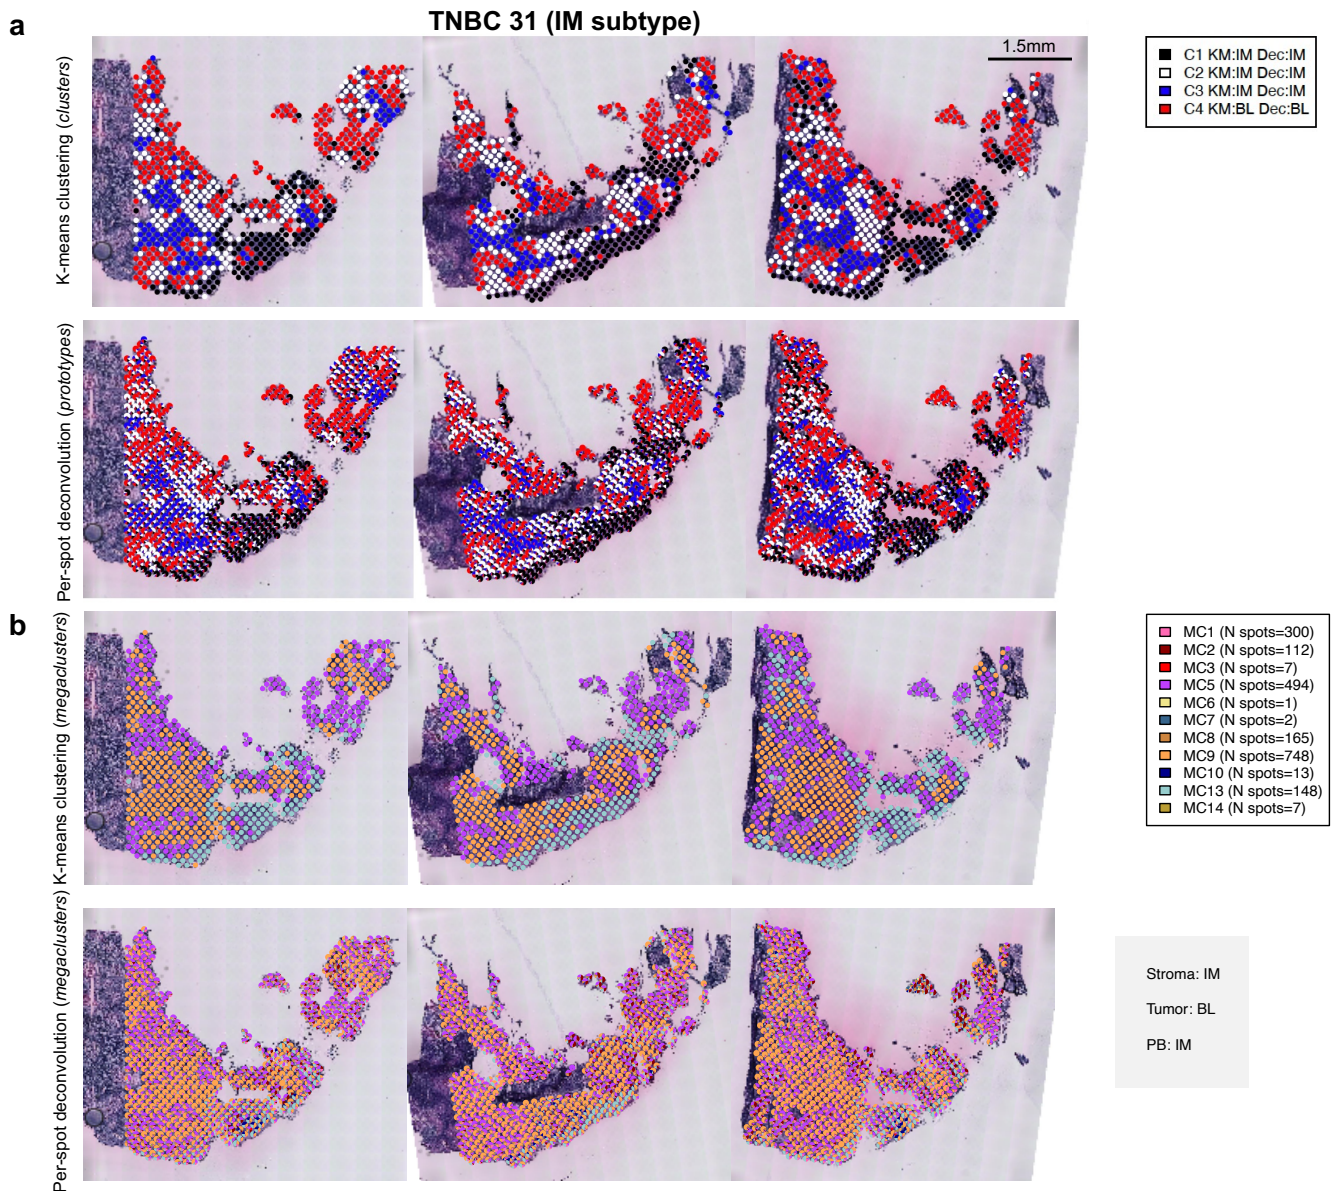

### Projections of intra-patient and inter-patient clusters in a TNBC sample classified as IM subtype on the ST global pseudobulk (ST\_TNBC\_ID 31).

**a** Projections of intra-patient clusters defined by K-means (*top*) and by per-spot deconvolution of the intra-patient clusters (*bottom*). Clusters C1, C2, C3 are classified as IM and cluster C4 as BL.

**b** Projections of inter-patient megaclusters based on K-means (*top*) and independent projection of per-spot deconvoluted megaclusters (*bottom*). K-means-derived megaclusters matched with the spatial distribution of K-means-derived intra-patient clusters. The prevalence of per-spot deconvoluted megaclusters is represented by the number of cumulated spots assigned to the given megacluster (*N spot*). K-means identifies 3 megaclusters (MC 5, MC 9 and MC 13). Per-spot deconvolution identifies different contribution of 11 megaclusters.

At the sample level, the TNBC molecular subtypes are computed on the ST global pseudobulk (PB), stroma and tumor PBs (stroma, tumor).

Dec: deconvolution; IM: immunomodulatory; KM: K-means; PB: global pseudobulk; ST: spatial transcriptomics; TNBC: triple negative breast cancer.



## Supplementary Figure 11

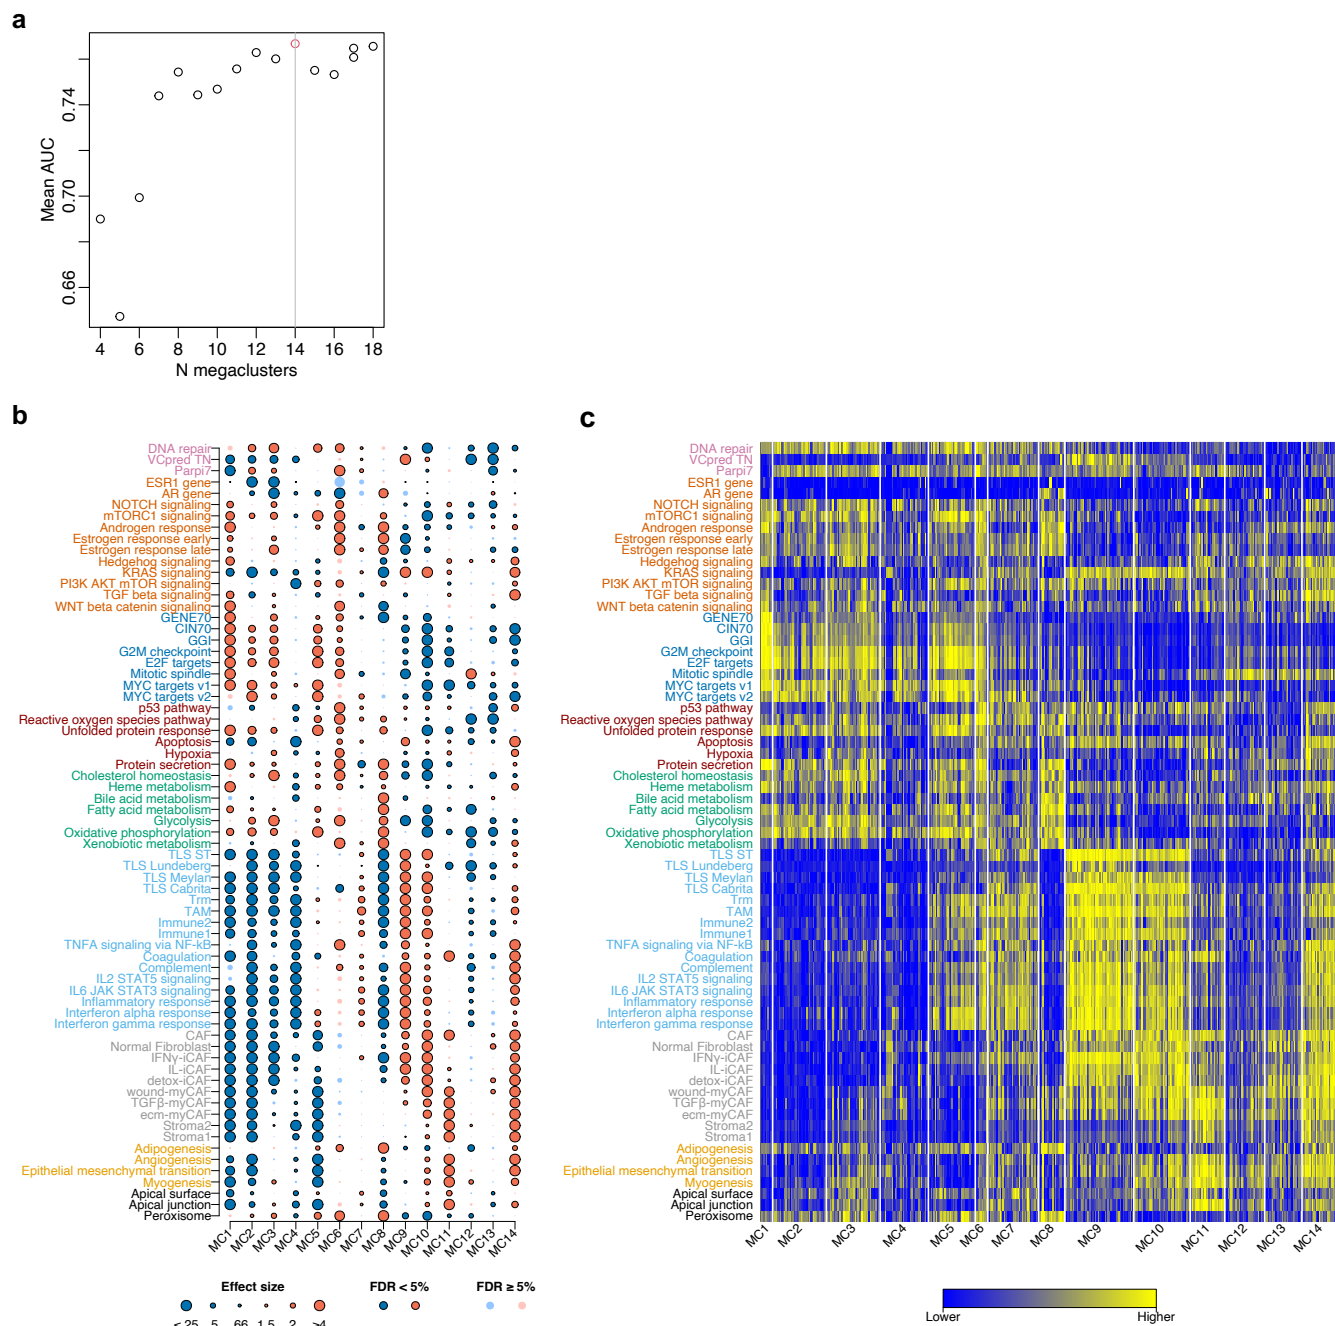

### Optimization of megacluster numbers and their molecular characterization based on gene signatures in the ST TNBC cohort ( $N = 94$ ).

**a** Optimal number of megaclusters based on the highest mean AUC from the recovery of each MC in the bulk RNA-seq of the ST TNBC cohort.

**b** Associations between gene signatures and megaclusters. Logistic regressions are used to evaluate associations between each specific gene signature and megacluster (one vs. rest). Two-sided P values were obtained from Wilcoxon rank sum tests and corrected for multi testing. Dots are bordered and dark-colored when FDRs  $< 0.05$ , compared to lighter-colored dots when FDRs  $\geq 0.05$ . Negative and positive associations are represented in blue and red, respectively.

**c** Heatmap showing gene signatures on individual samples across the 14 megaclusters. The signatures are selected and ordered as in the adjacent dot plot.

Source data are provided as a Source Data file.

AUC: area under the curve; CAF: cancer associated fibroblast S1; FDR: false-discovery rate; GGI: genomic grade index; IL2: interleukin 2; IL6: interleukin 6; MC: megacluster; Parp17: parp inhibitor

7; ST: spatial transcriptomics; TAM: tumor associated macrophages; TLS: tertiary lymphoid structure; TNF A: tumor necrosis factor alpha; Trm: tissue-resident memory T cell; VCpredTN: veliparib carboplatin prediction triple negative.

## Supplementary Figure 12

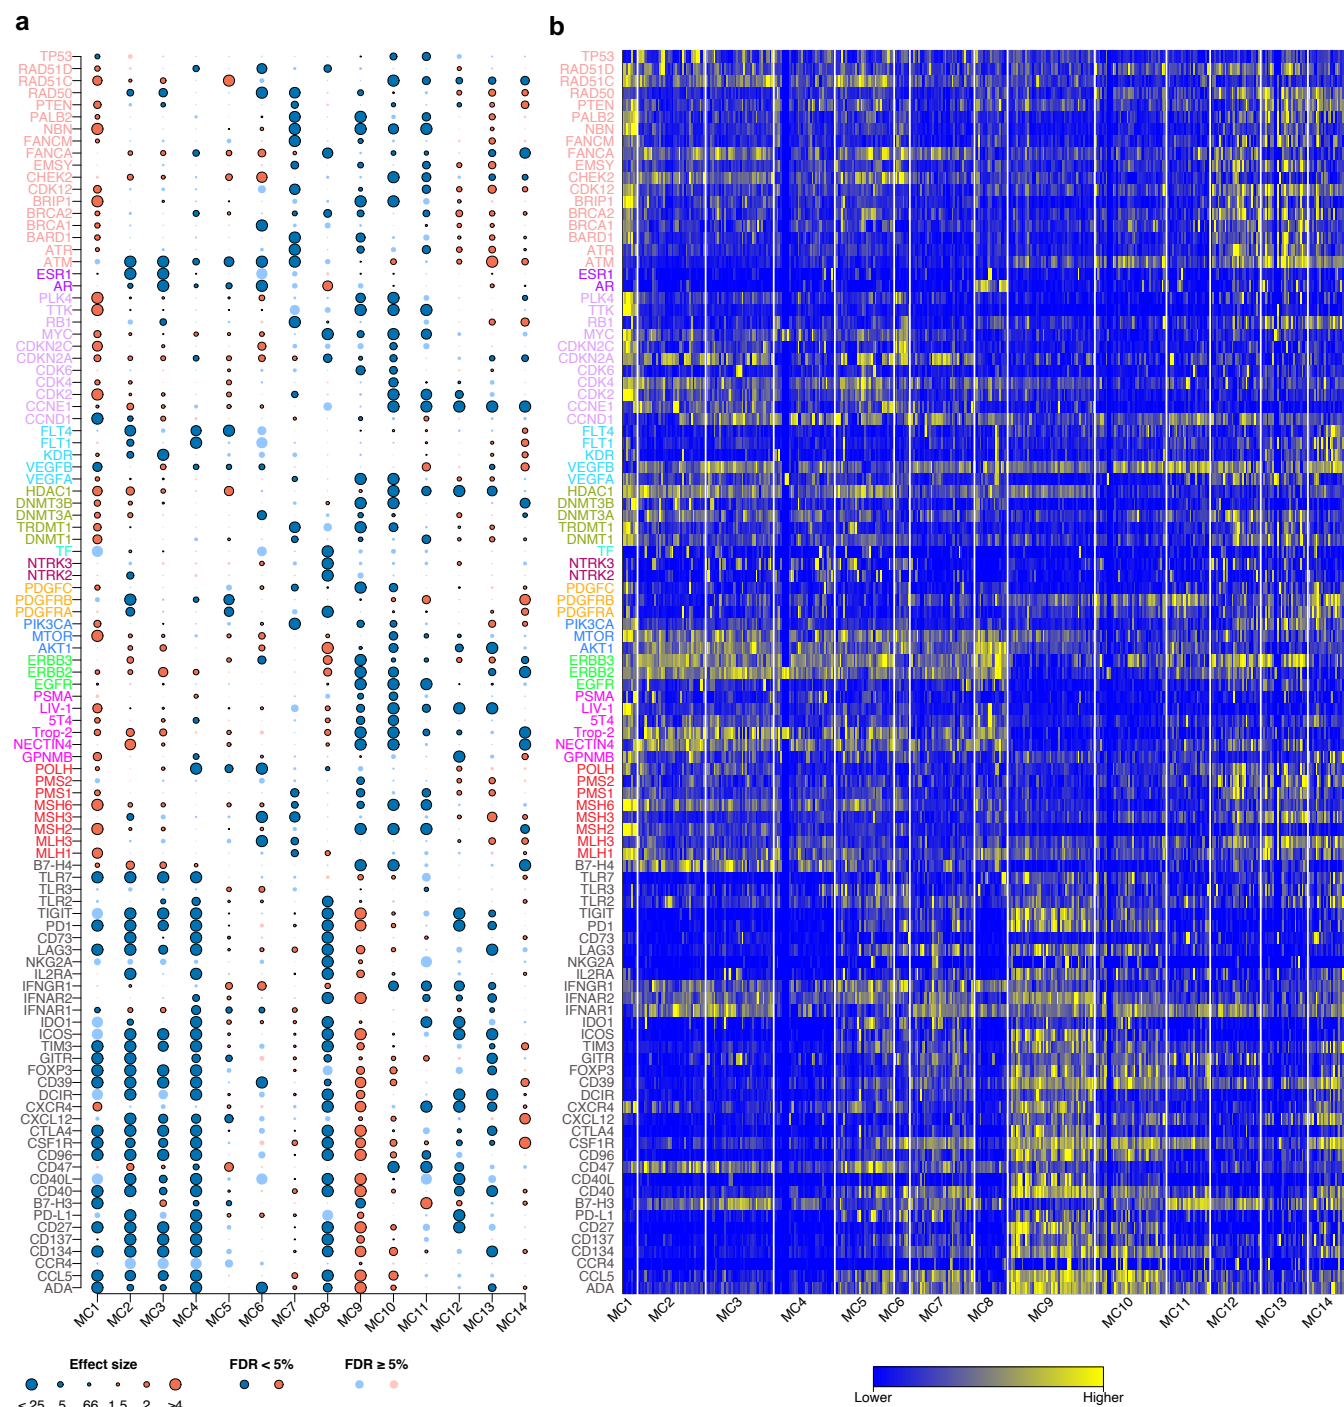

### Characterization of the fourteen megaclusters using the expression of single genes of interest in the ST TNBC cohort ( $N = 94$ ).

**a** Associations between single genes of interest and megaclusters. Logistic regressions are used to evaluate associations between each single gene expression and megacluster (one vs. rest). Two-sided P values were obtained from Wilcoxon rank sum tests and corrected for multi testing. Dots are bordered and dark-colored when FDRs  $< 0.05$ , compared to lighter-colored dots when FDRs  $\geq 0.05$ . Negative and positive associations are represented in blue and red, respectively.

**b** Heatmap showing single genes of interest by individual samples across the 14 megaclusters. The single genes are selected and ordered as in the adjacent plot.

Source data are provided as a Source Data file.

FDR: false-discovery rate; MC: megacluster.

## Supplementary Figure 13

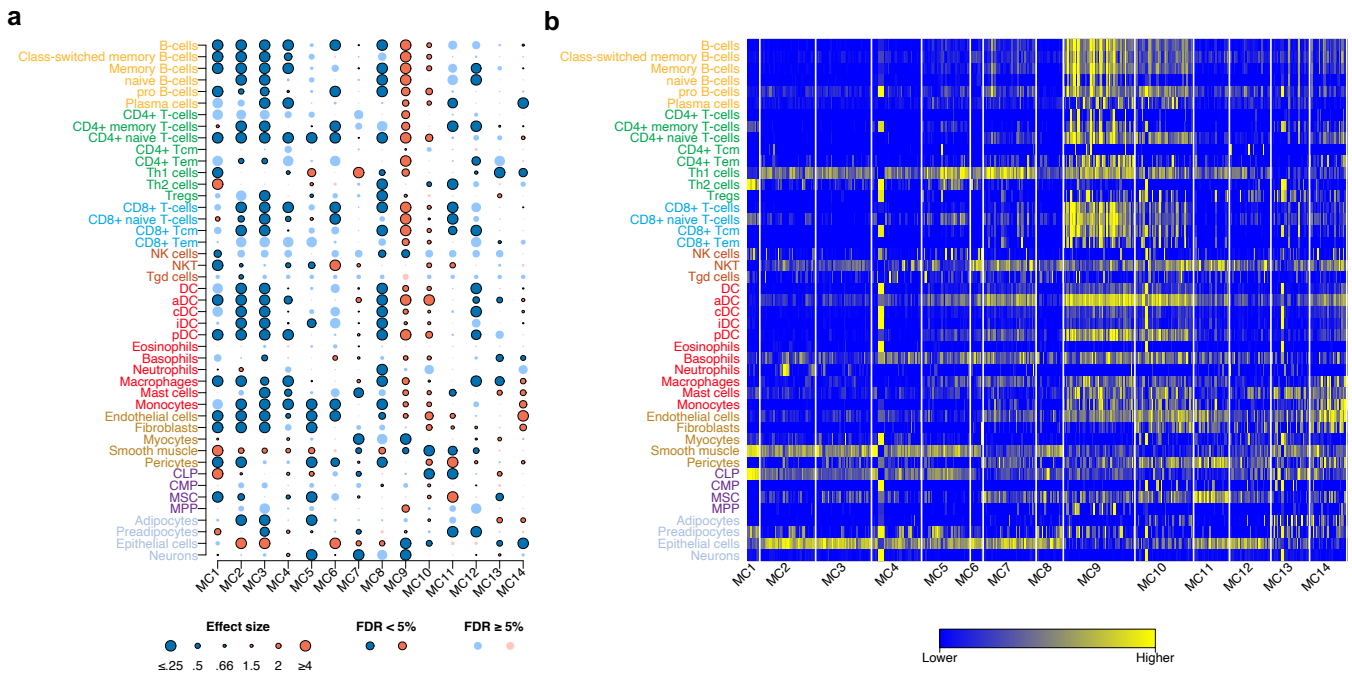

### Characterization of the fourteen megaclusters using cell type enrichment analysis in the ST TNBC cohort ( $N = 94$ ).

**a** Associations between cell type enrichment scores by xCell and each megacluster. Logistic regressions are used to evaluate associations between each cell type and each megacluster (one vs. rest). Two-sided P values were obtained from Wilcoxon rank sum tests and corrected for multi testing. Dots are bordered and dark-colored when FDRs  $< 0.05$ , compared to lighter-colored dots when FDRs  $\geq 0.05$ . Negative and positive associations are represented in blue and red, respectively.

**b** Heatmap showing cell type enrichment scores by individual samples across the 14 megaclusters. The cell types are selected and ordered as in the adjacent plot.

Source data are provided as a Source Data file.

aDC: activated dendritic cells; cDC: conventional dendritic cells; CLP: common lymphoid progenitor; CMP: common myeloid progenitor; DC: dendritic cells; GMP: granulocyte-macrophage progenitor; iDC: immature dendritic cells; MC: megacluster; MPP: multipotent progenitor; MSC: mesenchymal stem cell; NK: natural killer; pDC: plasmacytoid dendritic cells; Tcm: central memory T cells; Tem: effector memory T cells; Th1: type 1 helper; Th2: T helper 2; Tregs: regulatory T cells.

# Supplementary Figure 14

a

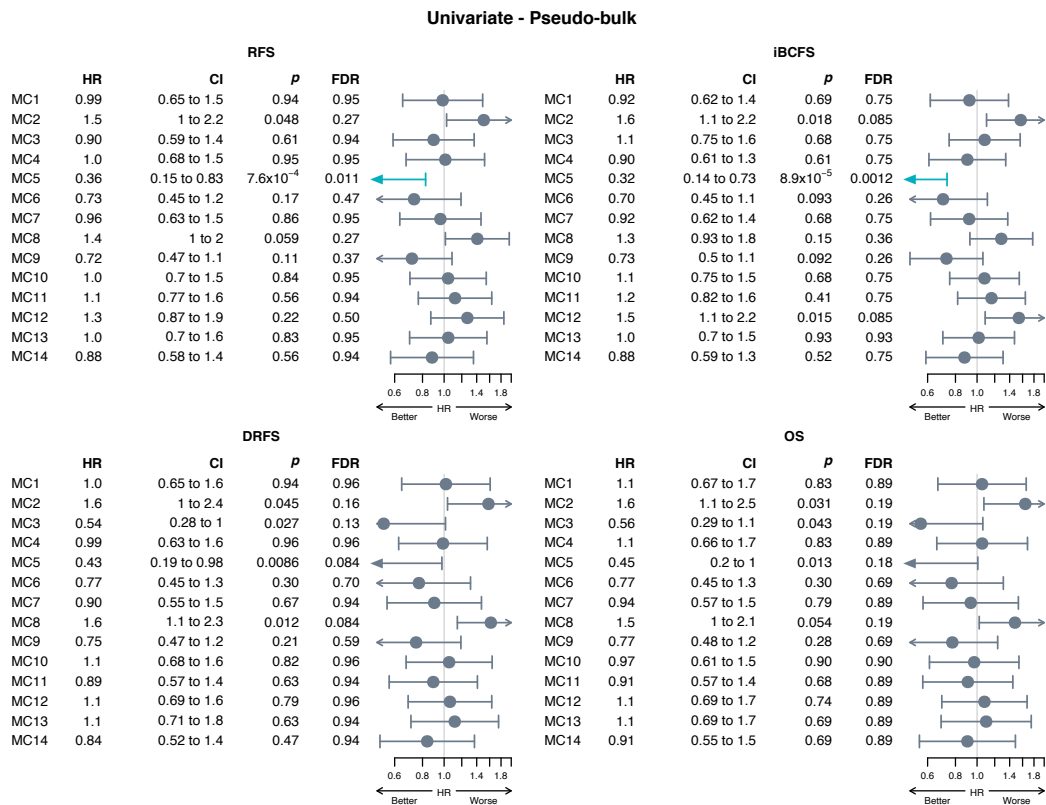

b

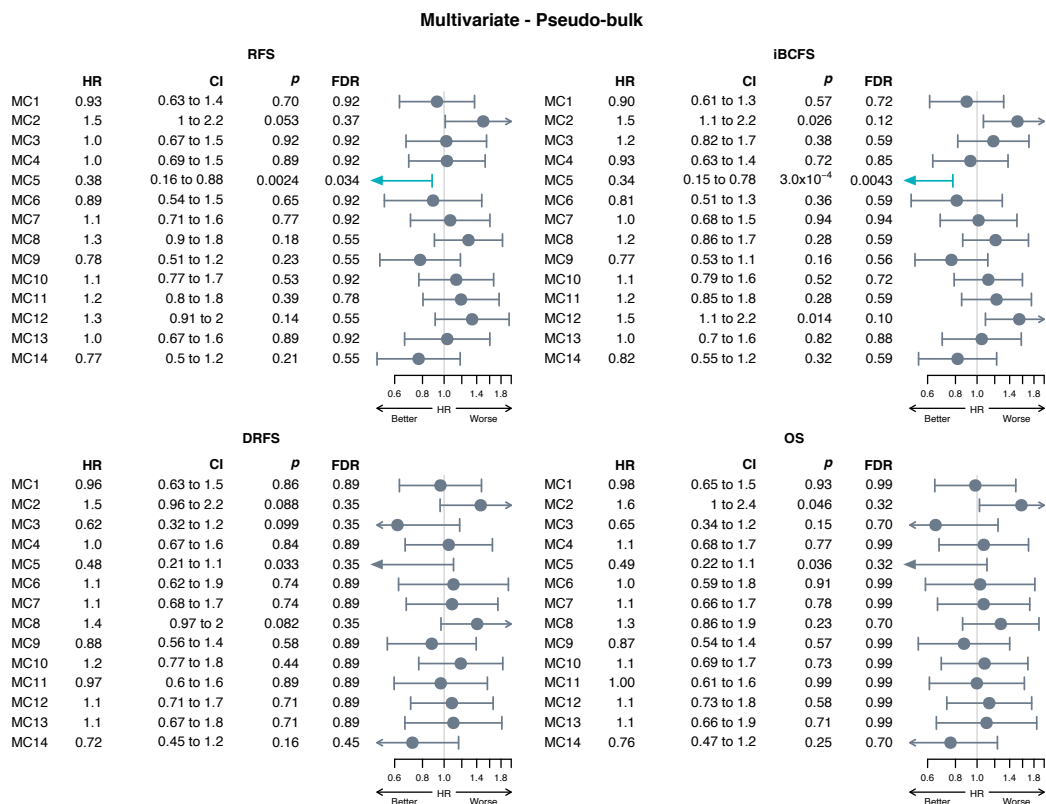

**Survival analysis of the fourteen megaclusters using the ST global pseudobulk in the ST TNBC cohort (N = 94).**

Association between survival outcomes and proportion of each megacluster within individual spots, estimated by the mean of the proportions in all ST spots, calculated by per-spot deconvolution. Proportions below 1% were put to 1%, then proportions were log transformed and scaled to a standard deviation of 1.

a Univariate analysis. P values were obtained using the likelihood ratio test.

**b** Multivariate analysis, correcting for clinic-pathological parameters (age, tumor size, nodal status). P values were obtained with a likelihood ratio test on nested Cox models. Significant FDRs are shown in blue (< 0.05). Circles indicate HR, and error bars the 95% confidence interval (95% CI). Source data are provided as a Source Data file.

CI: confidence interval; DRFS: distant relapse-free survival; FDR: false-discovery rate; HR: hazard ratio; iBCFS: invasive breast cancer-free survival; MC: megacluster; OS: overall survival; PB: pseudobulk; RFS: recurrence-free survival; ST: spatial transcriptomics; TNBC: triple negative breast cancer.

# Supplementary Figure 15

a

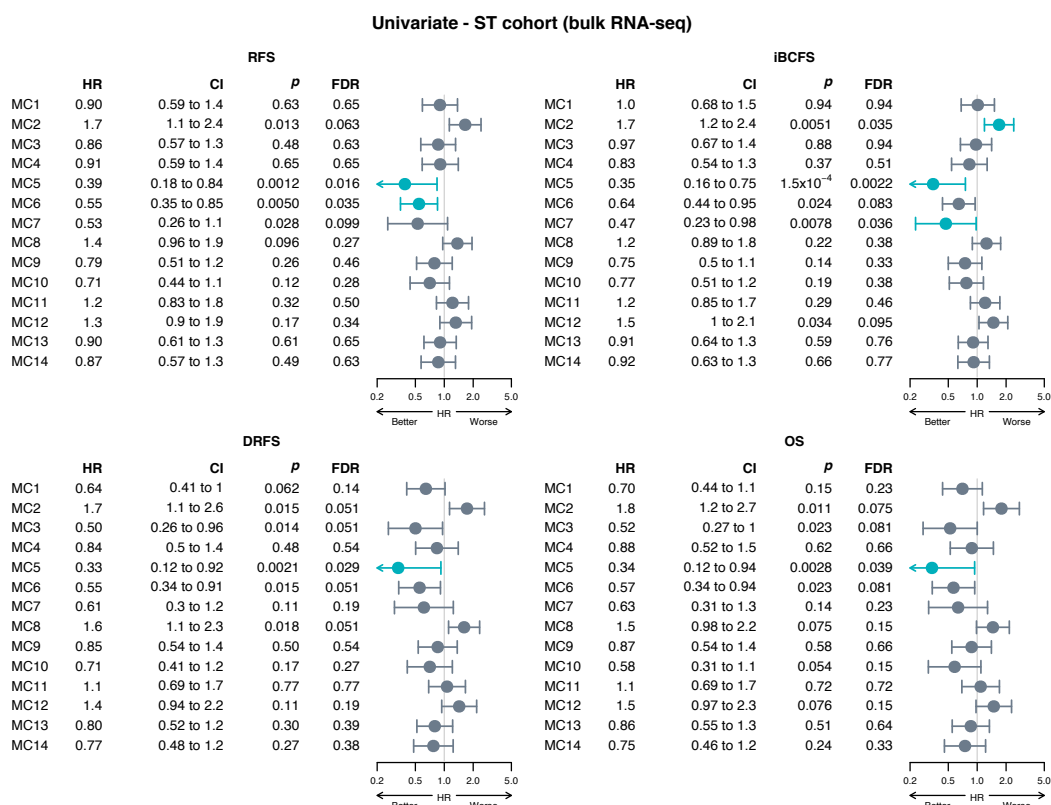

b

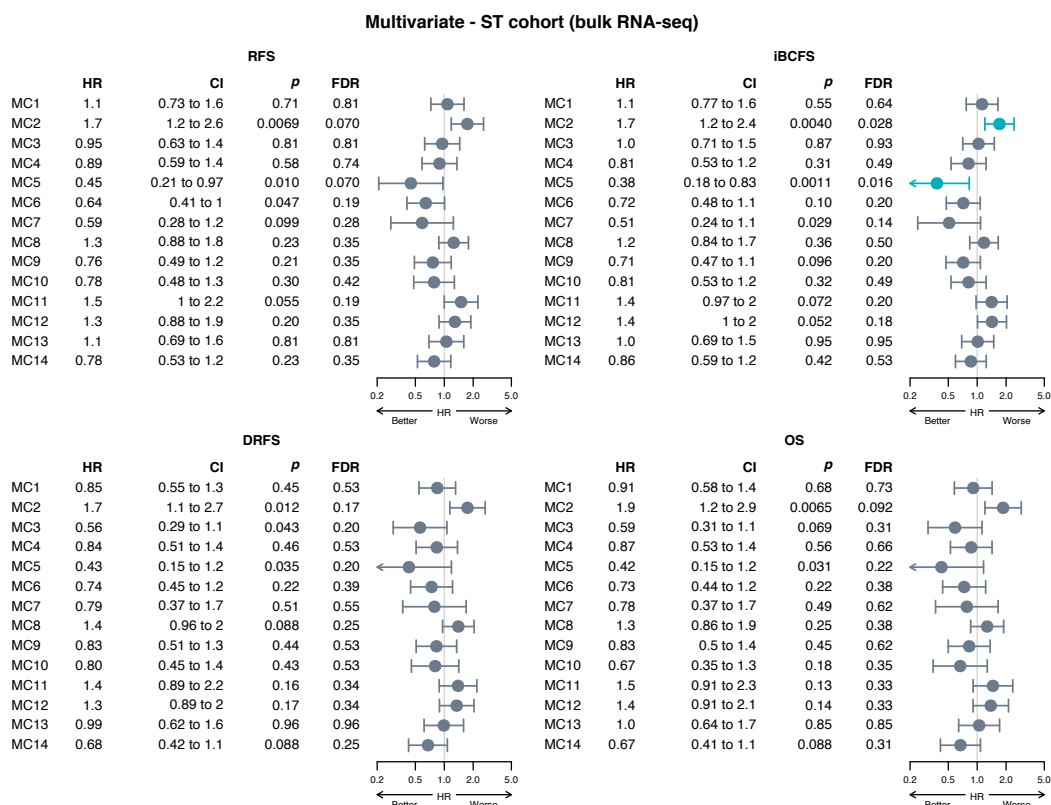

## Survival analysis of the fourteen megaclusters using the bulk RNA-seq data in the ST TNBC cohort (N = 94).

Association between survival outcomes and proportion of each megacluster, as estimated by deconvolution from the bulk expression data. Proportions below 1% were put to 1%, then proportions were log transformed and scaled to a standard deviation of 1.

a Univariate analysis. P values were obtained using the likelihood ratio test.

**b** Multivariate analysis, correcting for clinic-pathological parameters (age, tumor size, nodal status). P values were obtained with a likelihood ratio test on nested Cox models. Significant FDRs are shown in blue (< 0.05). Circles indicate HR, and error bars the 95% confidence interval (95% CI). Source data are provided as a Source Data file.

CI: confidence interval; DRFS: distant relapse-free survival; FDR: false-discovery rate; HR: hazard ratio; iBCFS: invasive breast cancer free survival; MC: megacluster; OS: overall survival; RFS: recurrence-free survival; ST: spatial transcriptomics; TNBC: triple negative breast cancer.



# Supplementary Figure 16

a

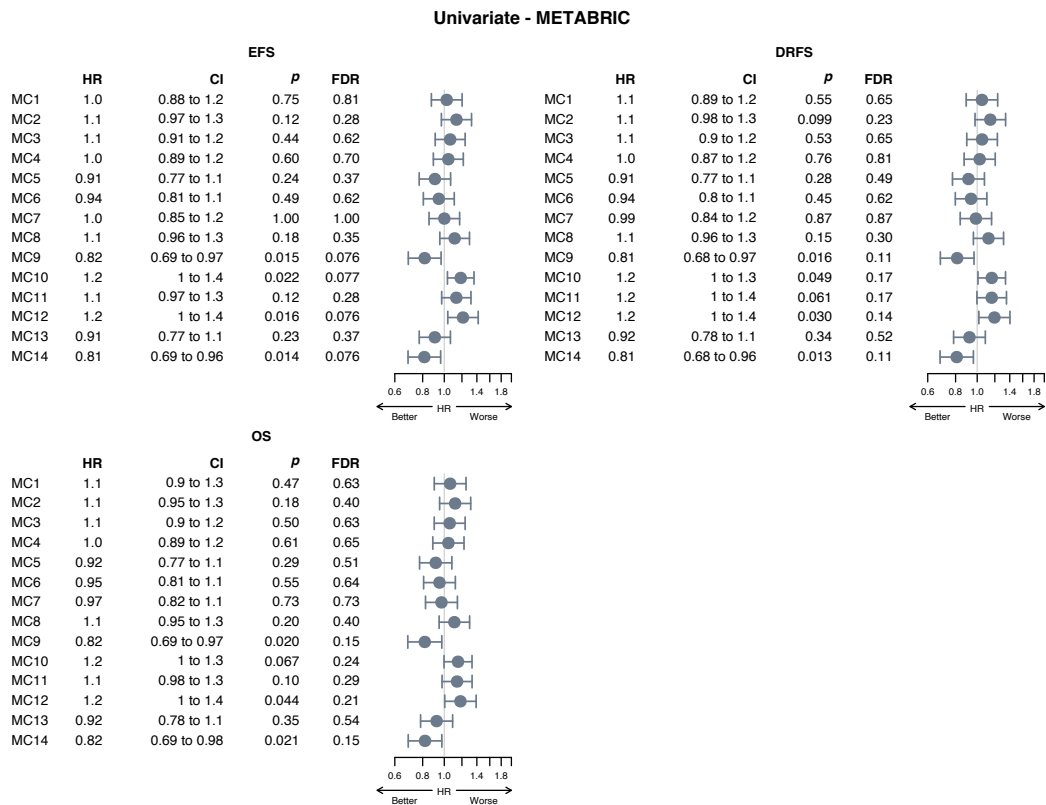

b

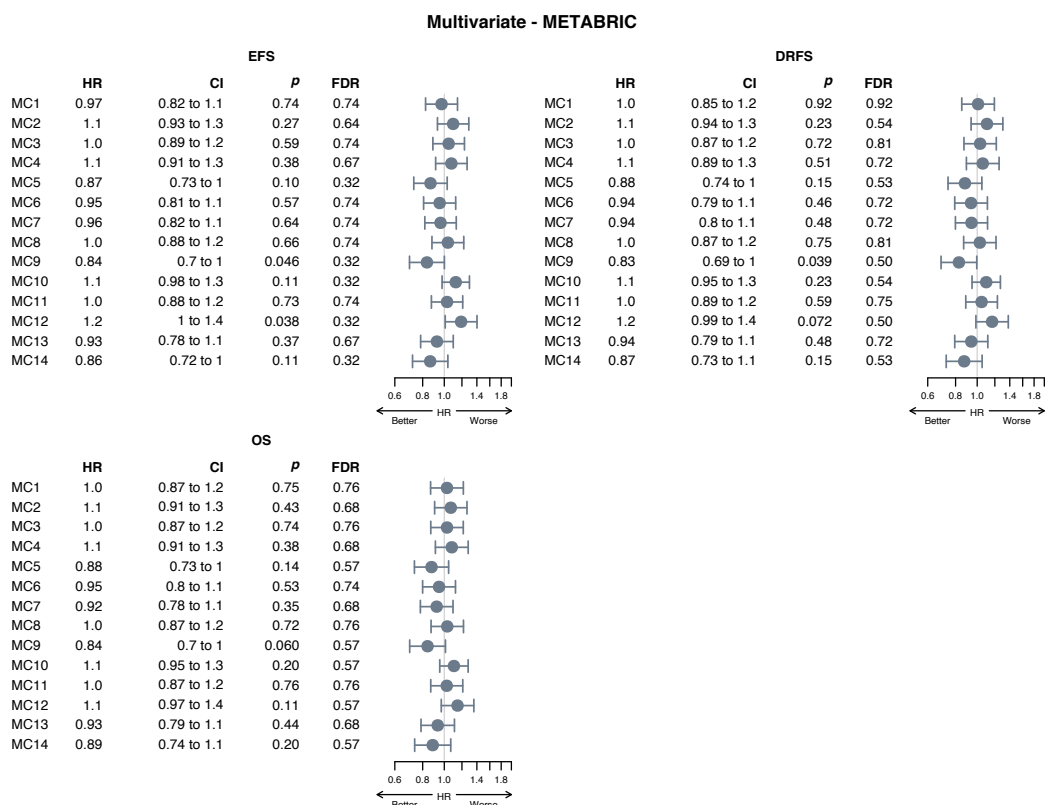

## Survival analysis of the fourteen megaclusters using the bulk RNA-seq data in the METABRIC TNBC cohort (N = 335).

Association between survival outcomes and proportion of each megacluster, as estimated by deconvolution from the bulk expression data. Proportions below 1% were put to 1%, then proportions were log transformed and scaled to a standard deviation of 1.

a Univariate analysis. P values were obtained using the likelihood ratio test.

**b** Multivariate analysis, correcting for clinic-pathological parameters (age, tumor size, nodal status). P values were obtained with a likelihood ratio test on nested Cox models. Significant FDRs are shown in blue (< 0.05). Circles indicate HR, and error bars the 95% confidence interval (95% CI). Source data are provided as a Source Data file.

CI: confidence interval; DRFS: distant relapse-free survival; EFS: event-free survival; FDR: false-discovery rate; HR: hazard ratio; MC: megacluster; OS: overall survival; ST: spatial transcriptomics.

# Supplementary Figure 17

a

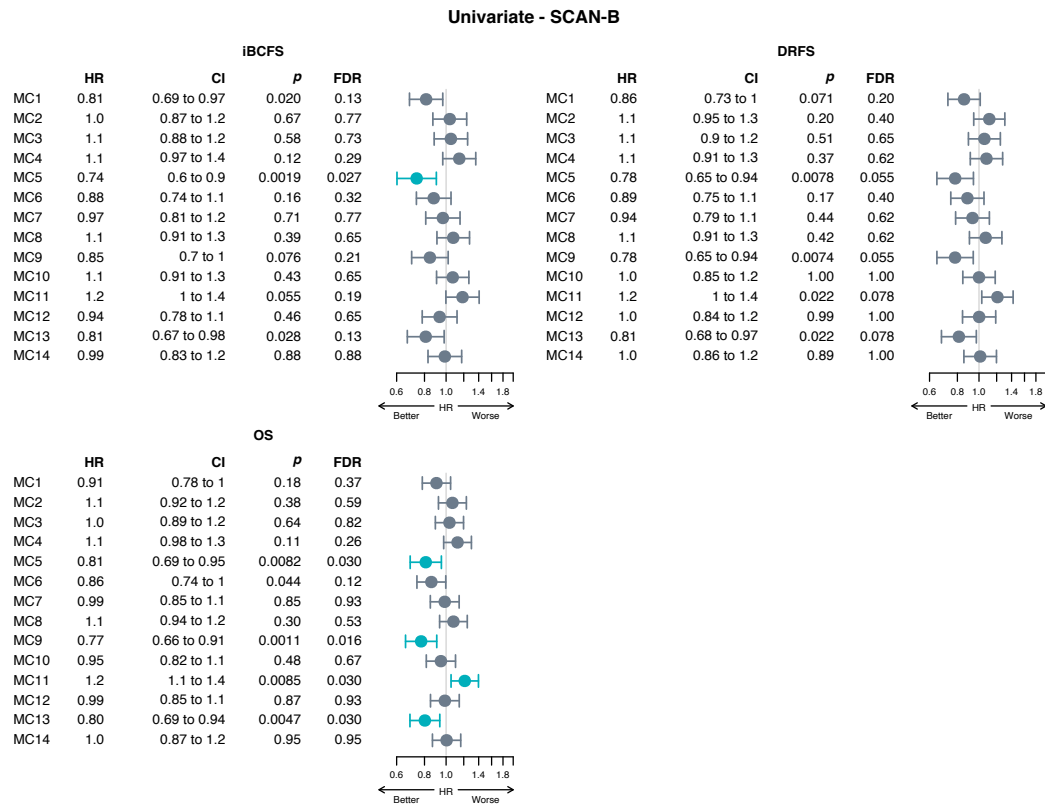

b

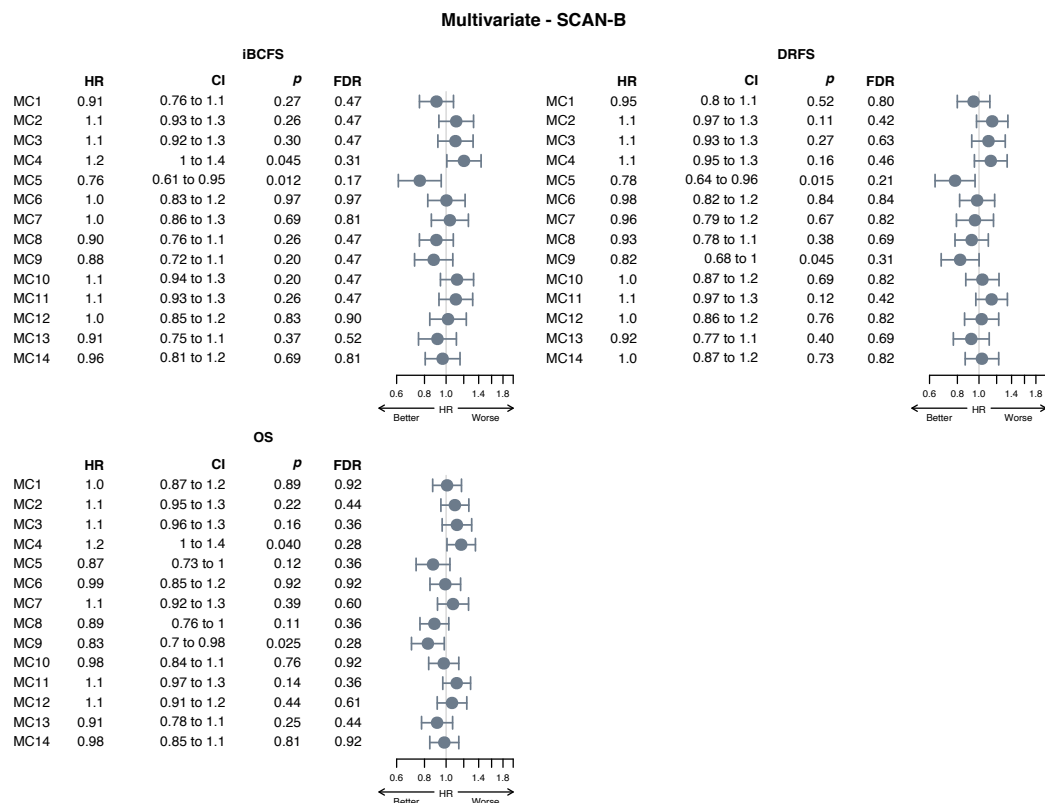

## Survival analysis of the fourteen megaclusters using the bulk RNA-seq data in the SCAN-B TNBC cohort (N = 672).

Association between survival outcomes and proportion of each megacluster, as estimated by deconvolution from the bulk expression data. Proportions below 1% were put to 1%, then proportions were log transformed and scaled to a standard deviation of 1.

a Univariate analysis. P values were obtained using the likelihood ratio test.

**b** Multivariate analysis, correcting for clinic-pathological parameters (age, tumor size, nodal status). P values were obtained with a likelihood ratio test on nested Cox models. Significant FDRs are shown in blue (< 0.05). Circles indicate HR, and error bars the 95% confidence interval (95% CI). Source data are provided as a Source Data file.

CI: confidence interval; DRFS: distant relapse-free survival; FDR: false-discovery rate; HR: hazard ratio; iBCFS: invasive breast cancer-free survival; MC: megacluster; OS: overall survival; ST: spatial transcriptomics.

# Supplementary Figure 18

a

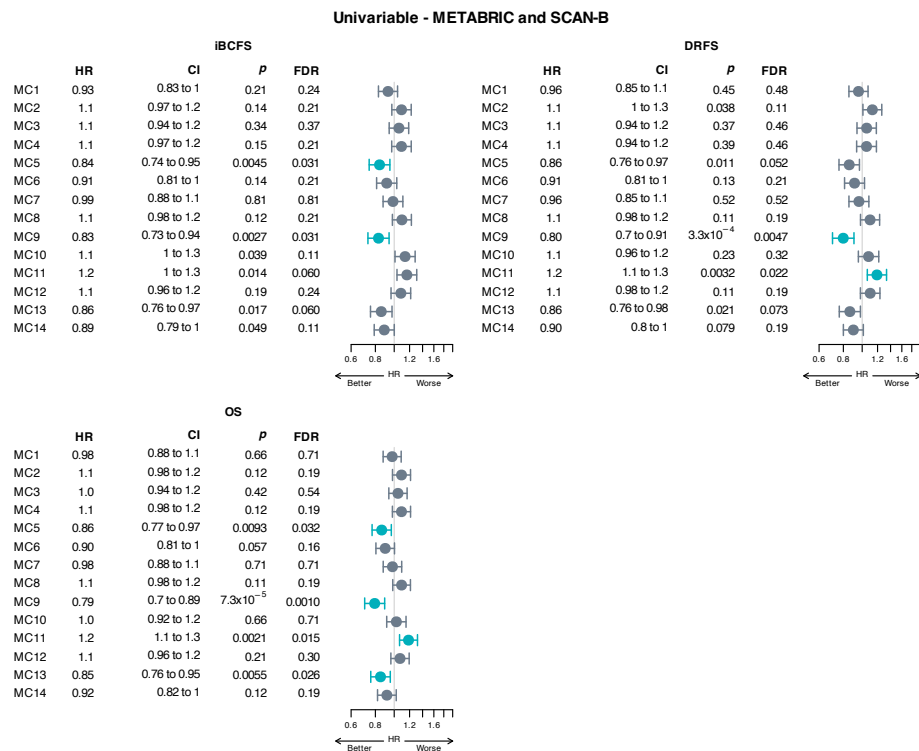

b

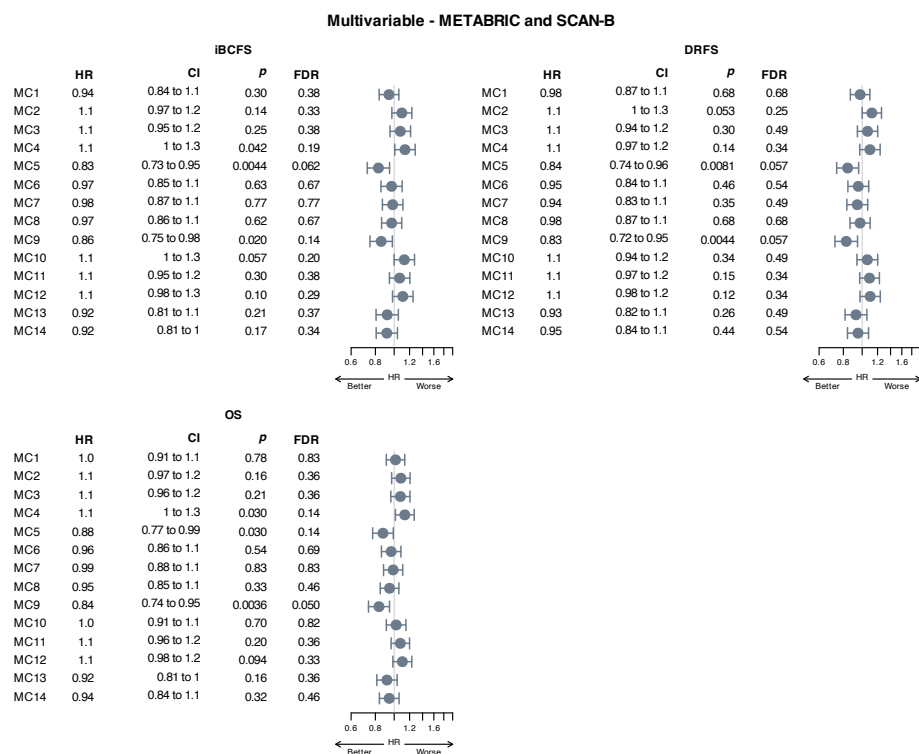

## Survival analysis of the fourteen megaclusters using the bulk RNA-seq data in the merged METABRIC and SCAN-B TNBC cohorts (N = 1007).

Association between survival outcomes and proportion of each megacluster, as estimated by deconvolution from the bulk expression data. Proportions below 1% were put to 1%, then proportions were log transformed and scaled to a standard deviation of 1. Survival analyses were stratified by study. The endpoint of iBCFS included also EFS from the METABRIC cohort.

a Univariate analysis. P values were obtained using the likelihood ratio test.

**b** Multivariate analysis, correcting for clinic-pathological parameters (age, tumor size, nodal status). P values were obtained with a likelihood ratio test on nested Cox models. Significant FDRs are shown in blue (< 0.05). Circles indicate HR, and error bars the 95% confidence interval (95% CI). Source data are provided as a Source Data file.

CI: confidence interval; DRFS: distant relapse-free survival; FDR: false-discovery rate; HR: hazard ratio; iBCFS: invasive breast cancer-free survival; MC: megacluster; OS: overall survival; ST: spatial transcriptomics.

## Supplementary Figure 19

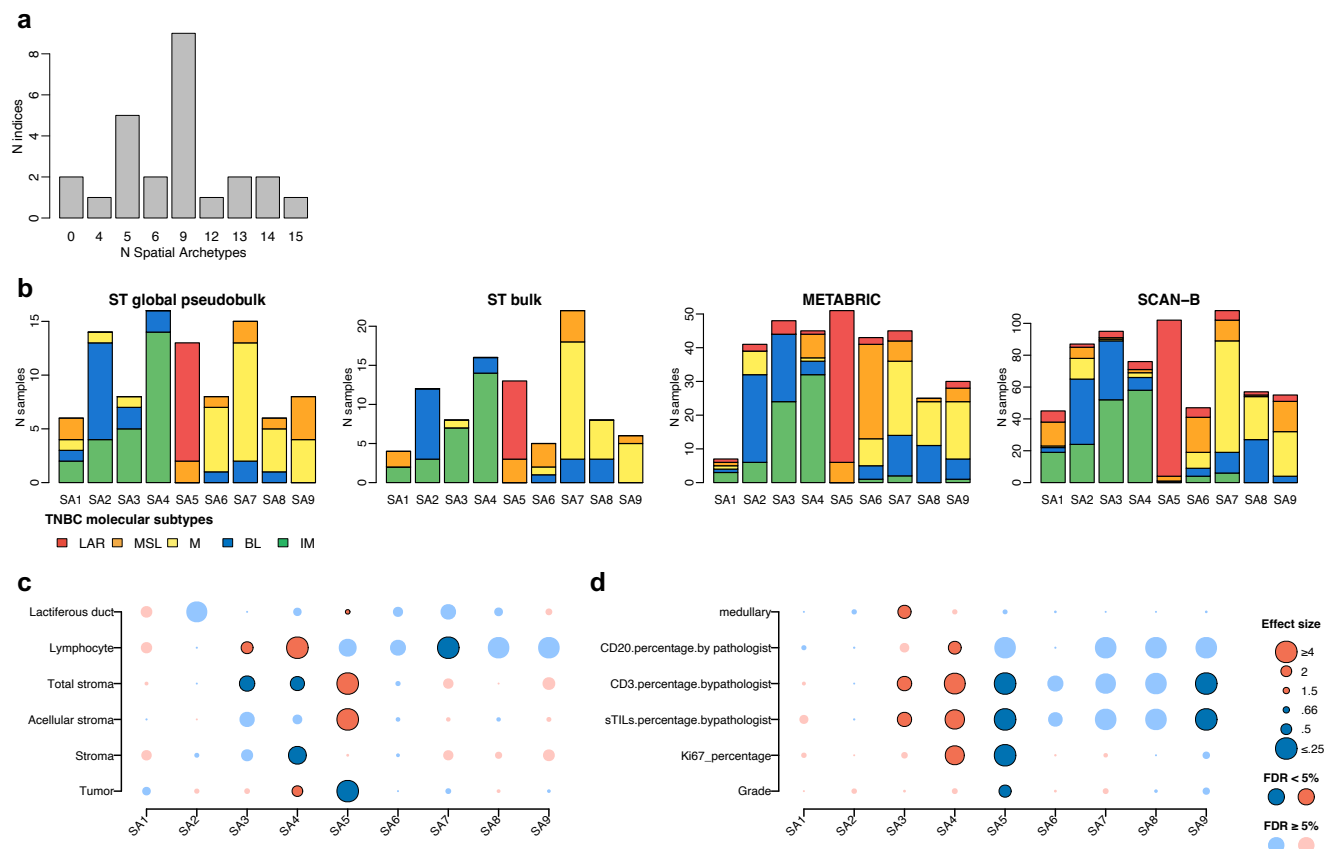

### Clinic-morphological and molecular characterization of the nine spatial archetypes.

**a** Optimal number of clusters (denoted as N spatial archetypes) determined using 23 different indices from hierarchical clustering of megacluster proportions with the ward.D2 method. The highest value (N Clusters) represents the optimal number of clusters to be considered.

**b** Distributions of the TNBC molecular subtypes within each of the 9 spatial archetypes in the different cohorts: ST TNBC global pseudobulk ( $N = 94$ ), ST TNBC bulk RNA-seq ( $N = 94$ ), METABRIC TNBC ( $N = 335$ ) and SCAN-B TNBC cohorts ( $N = 672$ ).

**c** Associations between contribution of morphological annotations and spatial archetypes in the ST TNBC cohort (global pseudobulk).

**d** Associations between clinic-pathological data and spatial archetypes in the ST TNBC cohort (global pseudobulk). A logistic regression was used to evaluate associations between each feature and spatial archetype. P values were obtained from Wilcoxon rank sum tests and corrected for multi testing. Dots are bordered and dark-colored when FDRs < 0.05, compared to lighter-colored dots when FDRs  $\geq$  0.05. Negative and positive associations are represented in blue and red, respectively. Source data are provided as a Source Data file.

BL: basal-like; IM: immunomodulatory; LAR: luminal androgen receptor; M: mesenchymal; MSC: mesenchymal stem cell; MSL: mesenchymal stem-like; SA: spatial archetype; ST: spatial transcriptomics; sTILs: stromal tumor infiltrating lymphocytes;

## Supplementary Figure 20

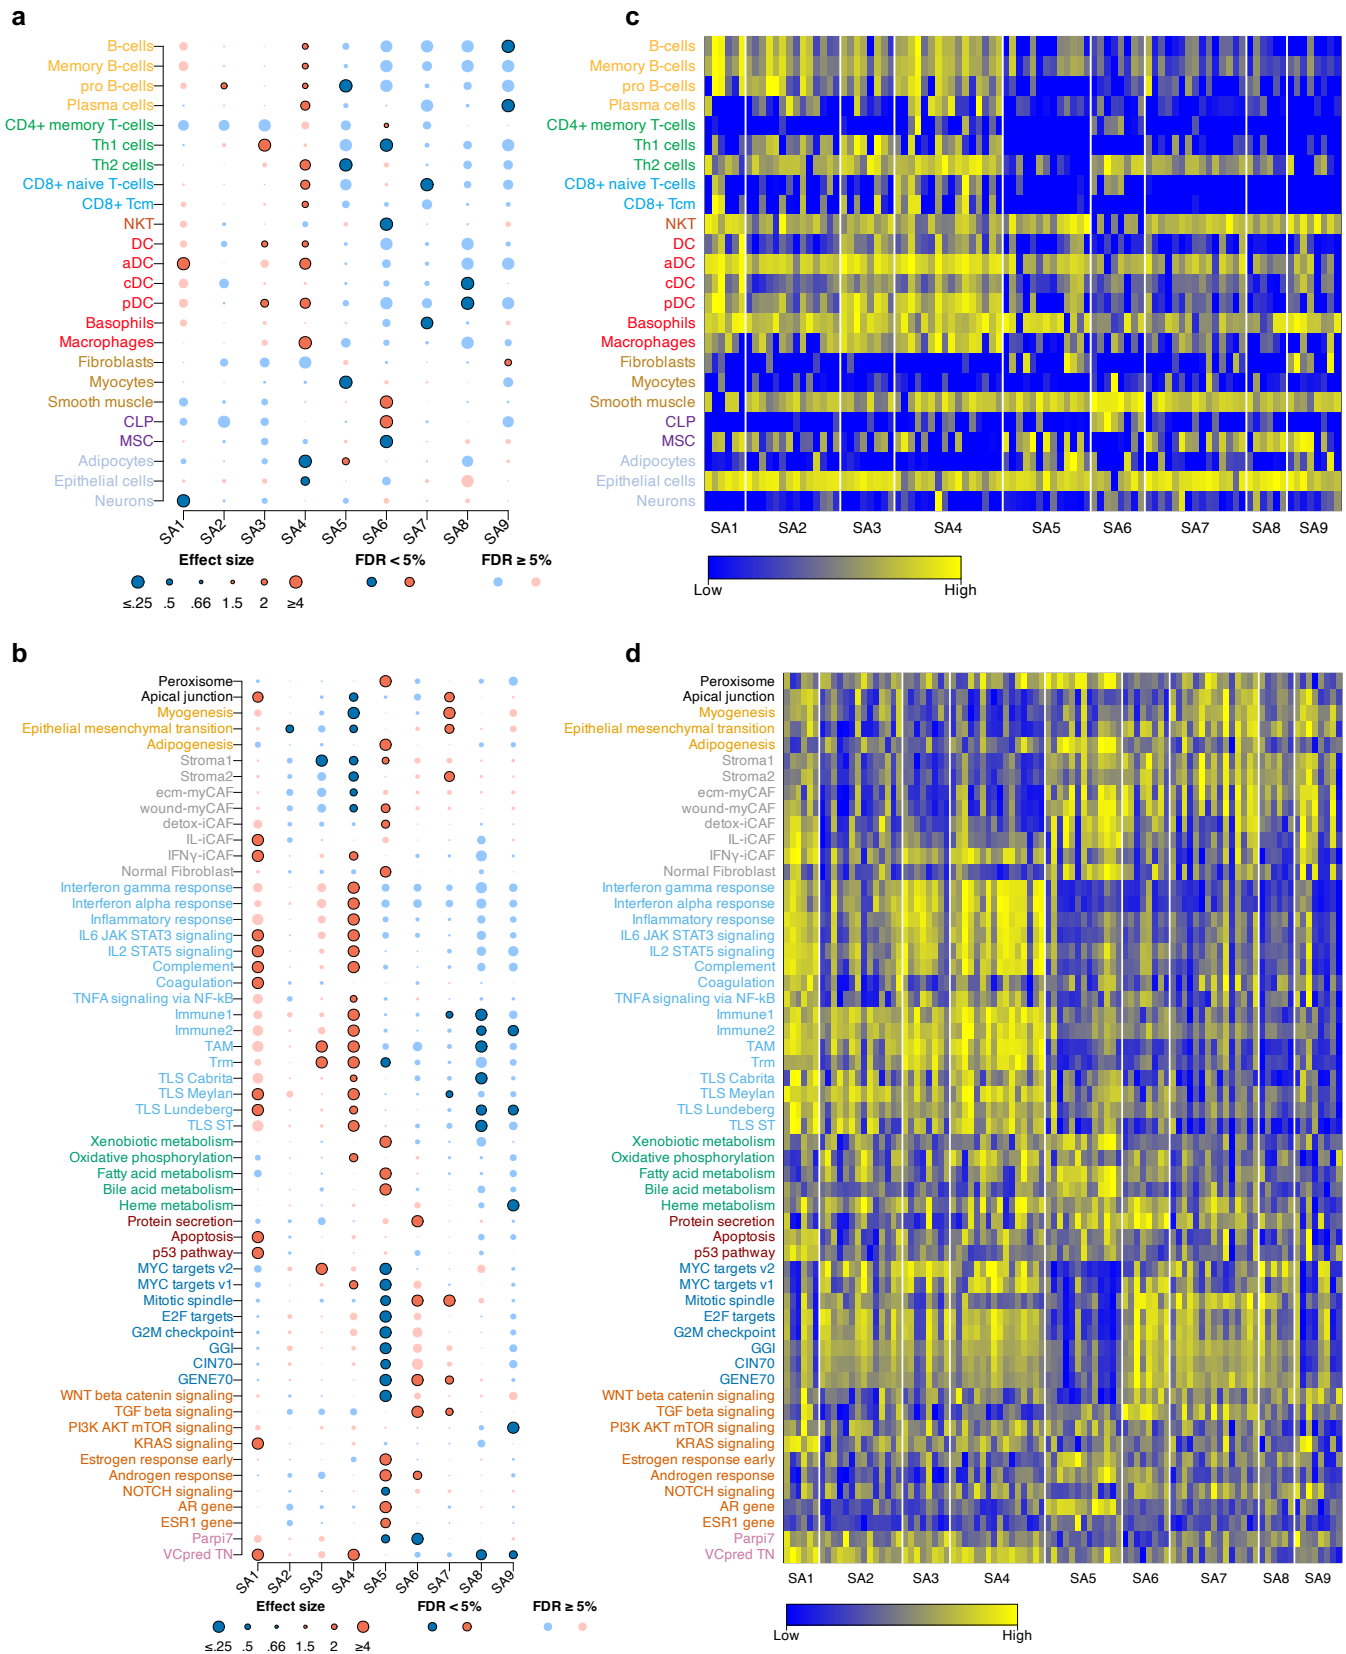

### Molecular characterization of the nine spatial archetypes in the ST TNBC cohort (N = 94).

**a,b** Associations between cell type enrichment scores by xCell (**a**) or gene signatures (**b**) and spatial archetypes in the ST TNBC cohort (global pseudobulk). A logistic regression was used to evaluate associations between each feature and spatial archetype. P values were obtained from Wilcoxon rank sum tests and corrected for multi testing. Dots are bordered and dark-colored when FDRs < 0.05, compared to lighter-colored dots when FDRs  $\geq$  0.05. Negative and positive associations are represented in blue and red, respectively.



**c,d** Heatmap showing cell type enrichment scores (**c**) or gene signatures (**d**) by individual samples across the 9 spatial archetypes. Cell types and gene signatures are selected and ordered as in the adjacent dot plot.

Source data are provided as a Source Data file.

aDC: activated dendritic cells; AR: androgen receptor; BL: basal-like; CAF: cancer associated fibroblast S1; cDC: conventional dendritic cells; CLP: common lymphoid progenitor; DC: dendritic cells; FDR: false-discovery rate; GGI: genomic grade index; IL2: interleukin 2; IL6: interleukin 6; IM: immunomodulatory; LAR: luminal androgen receptor; M: mesenchymal; MSC: mesenchymal stem cell; MSL: mesenchymal stem-like; NKT: natural killer T cells; Parpi7: parp inhibitor 7; pDC: plasmacytoid dendritic cells; SA: spatial archetype; ST: spatial transcriptomics; sTILs: stromal tumor infiltrating lymphocytes; Tcm: central memory T cells; Th1: T helper 1; Th2: T helper 2; TAM: tumor associated macrophages; TLS: tertiary lymphoid structure; TNF A: tumor necrosis factor alpha; Trm: tissue-resident memory T cell; VCpredTN: veliparib carboplatin prediction triple negative.

## Supplementary Figure 21

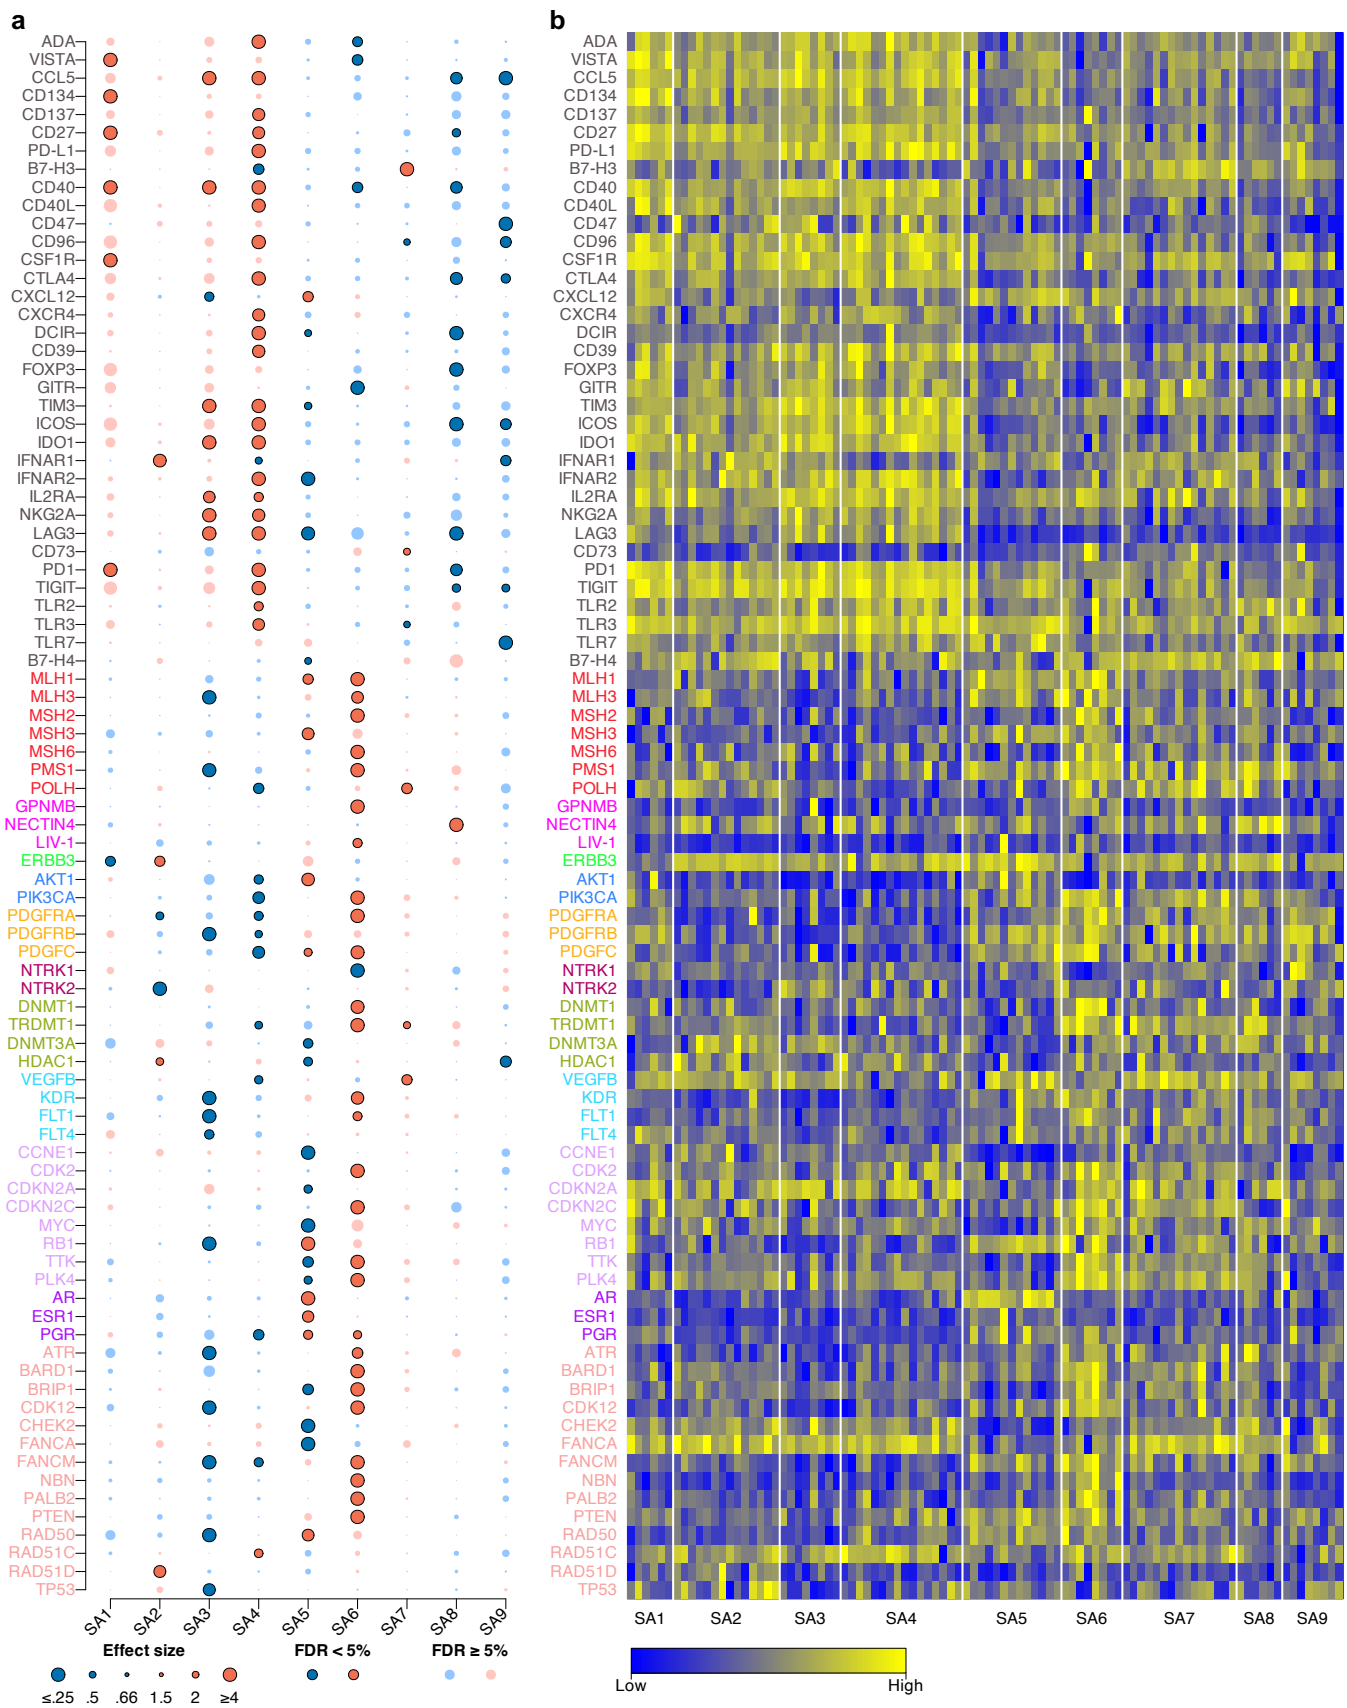

### Molecular characterization of the nine spatial archetypes by the expression of single genes of interest in the ST TNBC cohort ( $N = 94$ ).

**a** Associations between single genes of interest and spatial archetypes. A logistic regression model was used to evaluate associations between each single gene expression and spatial archetype. P values were obtained from Wilcoxon rank sum tests and corrected for multi testing. Dots are

bordered and dark-colored when FDRs  $< 0.05$ , compared to lighter-colored dots when FDRs  $\geq 0.05$ . Negative and positive associations are represented in blue and red, respectively.

**b** Heatmap showing single genes of interest by individual samples across the 9 spatial archetypes. The single genes are selected and ordered as in the adjacent plot.

Source data are provided as a Source Data file.

FDR: false-discovery rate; SA: spatial archetypes.

## Supplementary Figure 22

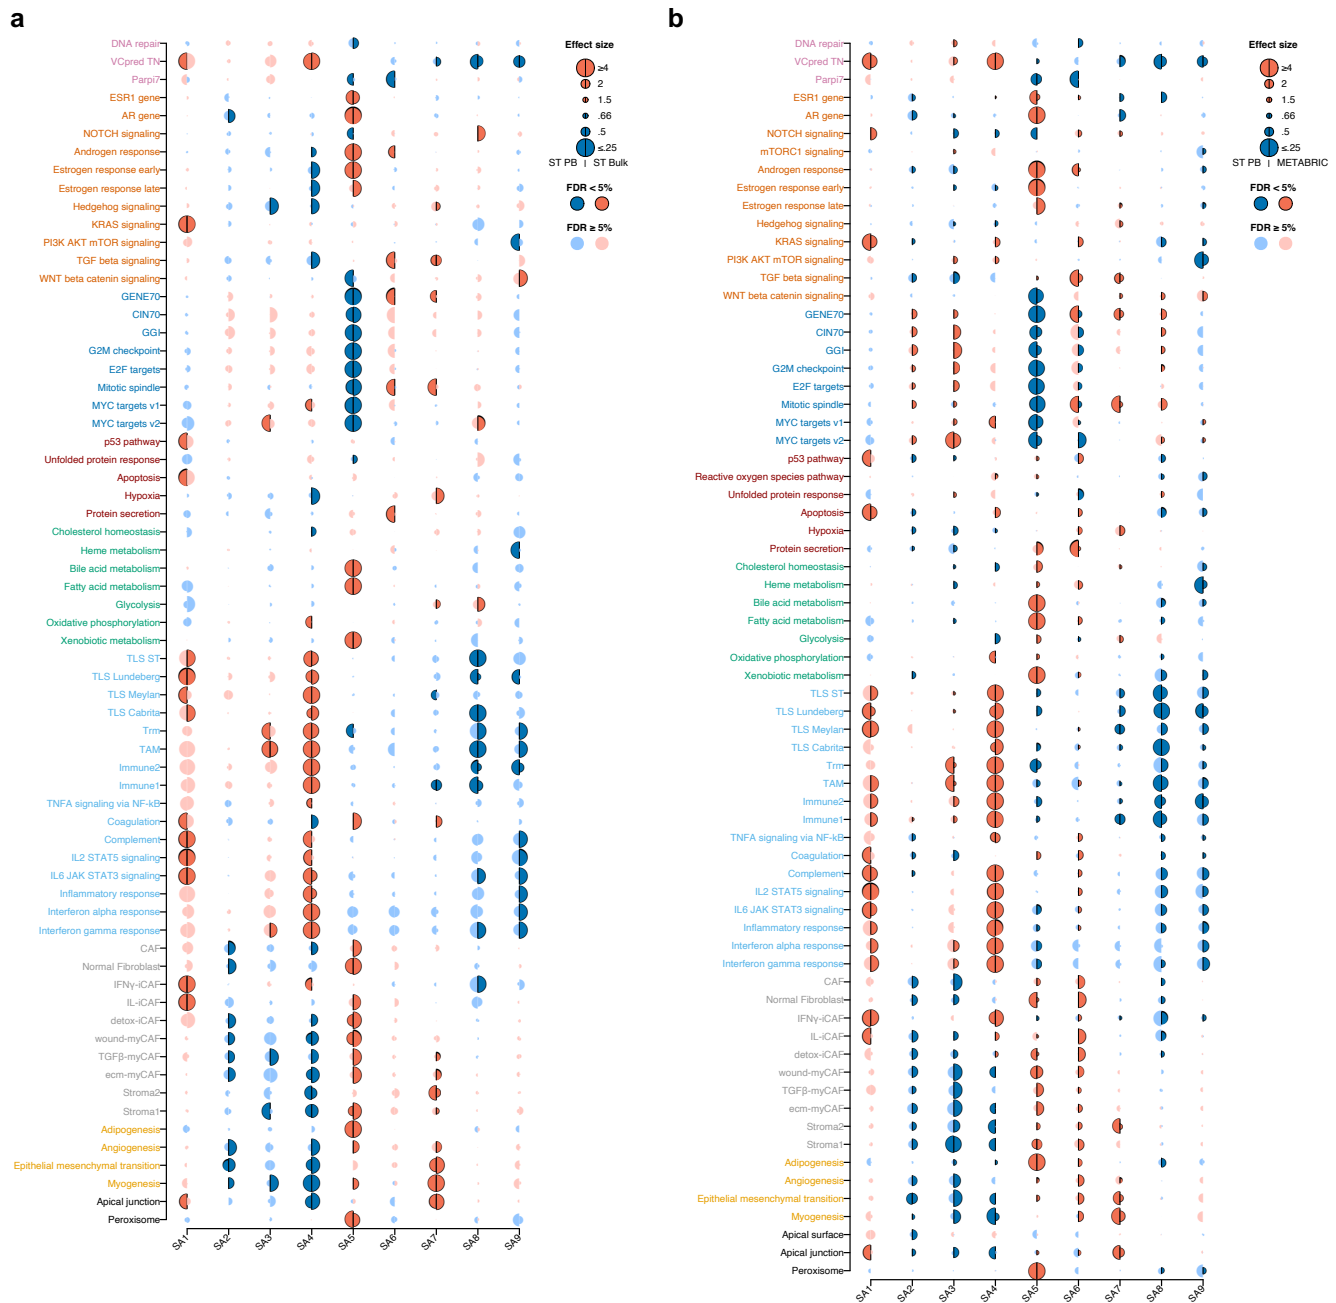

### Comparison of gene signatures across the nine spatial archetypes in the ST TNBC ( $N = 94$ ) and METABRIC TNBC cohorts ( $N = 335$ ).

**a,b** Associations between gene signatures and spatial archetypes in the ST TNBC and METABRIC cohorts. The left half-circle represents ST TNBC global pseudobulk and the right half-circle represents **(a)** ST TNBC bulk RNA-seq, **(b)** METABRIC TNBC cohorts.

A logistic regression model was used to evaluate associations between each specific gene signature and each spatial archetype. P values were obtained from Wilcoxon rank sum tests and corrected for multi testing. Dots are bordered and dark-colored when FDRs < 0.05, compared to lighter-colored dots when FDRs  $\geq$  0.05. Negative and positive associations are represented in blue and red, respectively.

Source data are provided as a Source Data file.

AR: androgen receptor; CAF: cancer associated fibroblast S1; GGI: genomic grade index; Parp17: parp inhibitor 7; PB: pseudobulk; SA: spatial archetype; ST: spatial transcriptomics; TAM: tumor associated macrophages; TLS: tertiary lymphoid structure; Trm: tissue-resident memory T cell; VCpredTN: veliparib carboplatin prediction triple negative

## Supplementary Figure 23

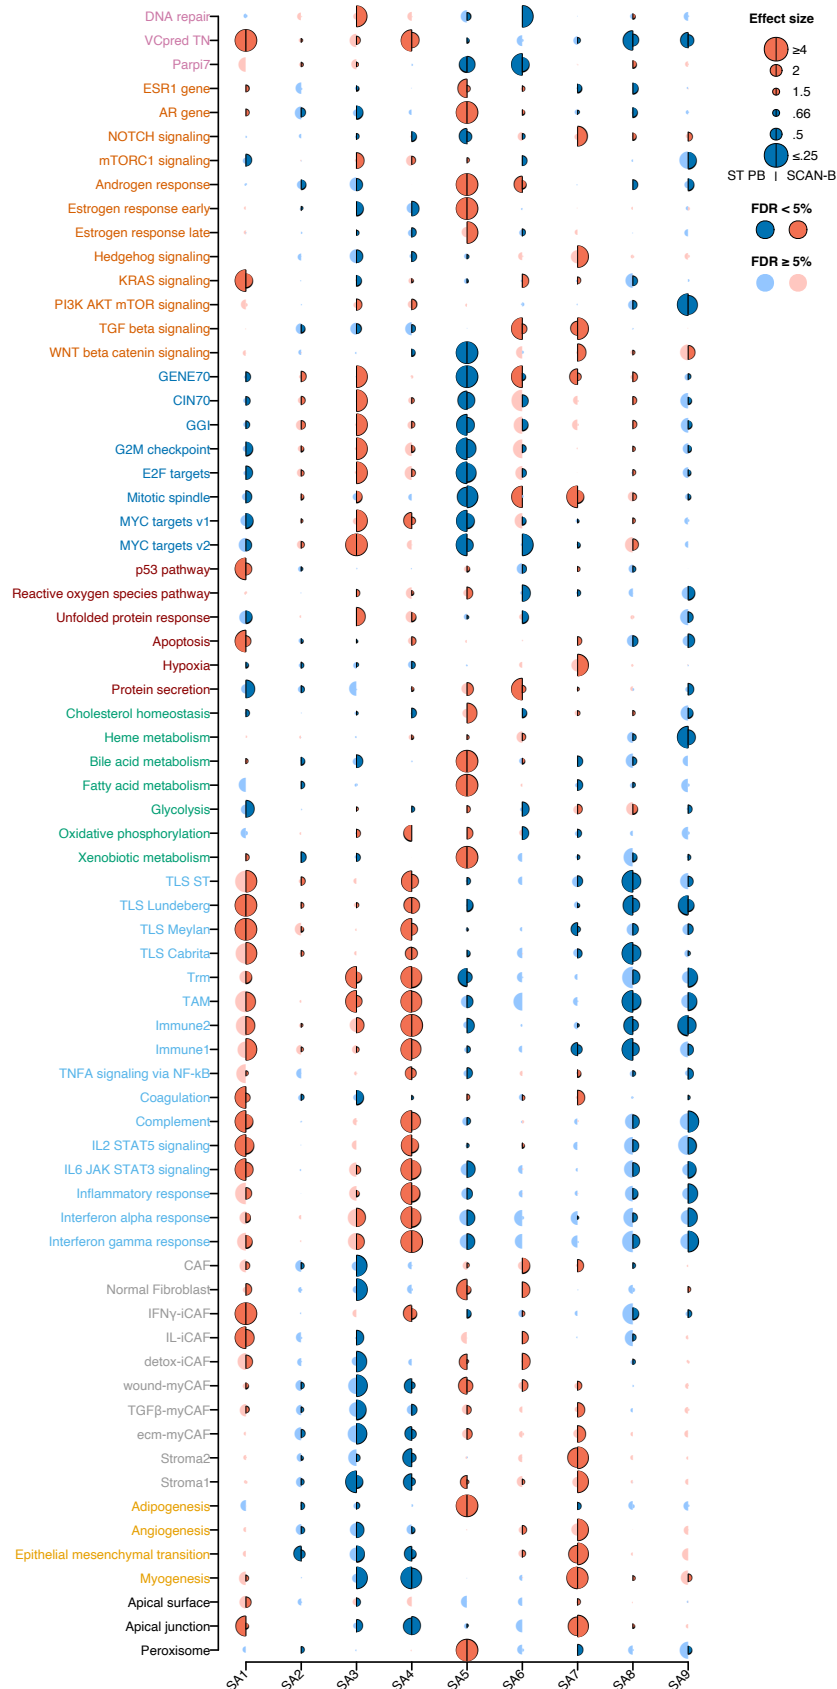

### Comparison of gene signatures across the nine spatial archetypes in the ST TNBC ( $N = 94$ ) and SCAN-B TNBC cohorts ( $N = 672$ ).

Associations between expression-based signatures and spatial archetypes in the ST TNBC and SCAN-B TNBC cohorts. The left and right half-circles represent ST TNBC global pseudobulk and SCAN-B TNBC cohorts respectively. A logistic regression model was used to evaluate associations between each specific gene signature and each spatial archetype. P values were obtained from

Wilcoxon rank sum tests and corrected for multi testing. Dots are bordered and dark-colored when FDRs < 0.05, compared to lighter-colored dots when FDRs  $\geq$  0.05. Negative and positive associations are represented in blue and red, respectively. Source data are provided as a Source Data file.

AR: androgen receptor; CAF: cancer associated fibroblast S1; GGI: genomic grade index; Parpi7: parp inhibitor 7; PB: pseudobulk; SA: spatial archetypes; ST: spatial transcriptomics; TAM: tumor associated macrophages; TLS: tertiary lymphoid structure; Trm: tissue-resident memory T cell; VCPredTN: veliparib carboplatin prediction triple negative.

## Supplementary Figure 24

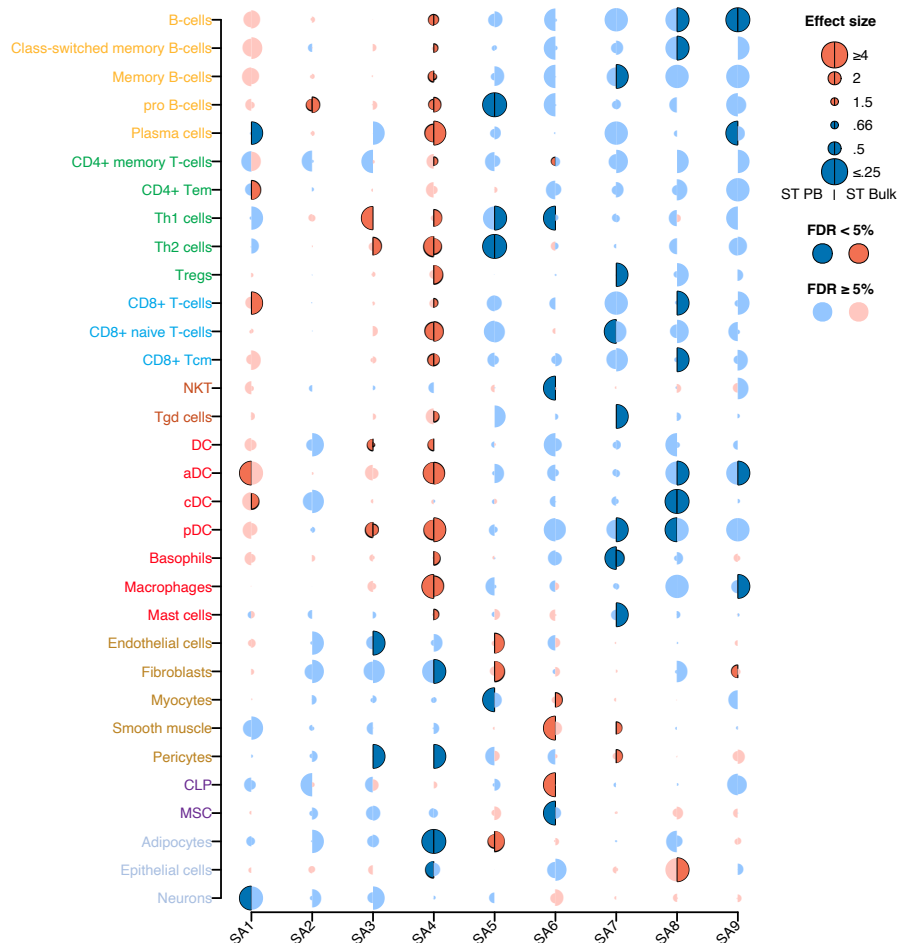

### Comparison of cell type enrichment analysis across the nine spatial archetypes in the ST TNBC cohort ( $N = 94$ ).

Associations between cell type enrichment scored by xCell and spatial archetypes. The left half-circle represents ST TNBC global pseudobulk and the right half-circle represents ST TNBC bulk RNA-seq.

A logistic regression model was used to evaluate associations between each cell type enrichment score and each spatial archetypes. P values were obtained from Wilcoxon rank sum tests and corrected for multi testing. Dots are bordered and dark-colored when FDRs < 0.05, compared to lighter-colored dots when FDRs  $\geq$  0.05. Negative and positive associations are represented in blue and red, respectively.

Source data are provided as a Source Data file.

aDC: activated dendritic cells; cDC: conventional dendritic cells; CLP: common lymphoid progenitor; CMP: common myeloid progenitor; DC: dendritic cells; GMP: granulocyte-macrophage progenitor; iDC: immature dendritic cells; MPP: multipotent progenitor; MSC: mesenchymal stem cell; NK: natural killer; PB: pseudobulk; pDC: plasmacytoid dendritic cells; SA: spatial archetype; ST: spatial transcriptomics; Tcm: central memory T cells; Tem: effector memory T cells; Th1: type 1 helper; Th2: T helper 2; Tregs: regulatory T cells.

## Supplementary Figure 25

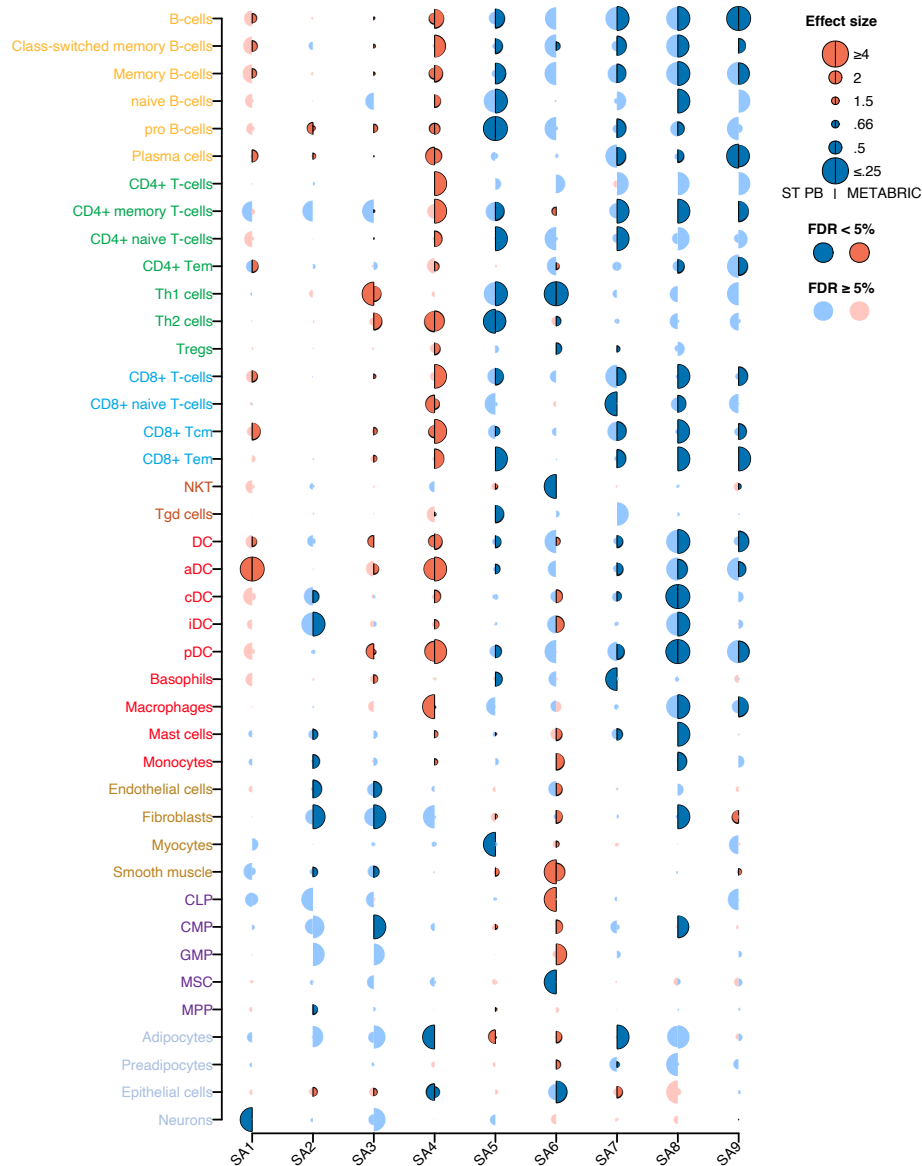

### Comparison of cell type enrichment analysis across the nine spatial archetypes in the ST TNBC ( $N = 94$ ) and METABRIC TNBC cohorts ( $N = 335$ ).

Associations between cell type enrichment scored by xCell and spatial archetypes. The left half-circle represents ST TNBC global pseudobulk and the right half-circle represents METABRIC TNBC cohort.

A logistic regression model was used to evaluate associations between each cell type enrichment score and each spatial archetype. P values were obtained from Wilcoxon rank sum tests and corrected for multi testing. Dots are bordered and dark-colored when FDRs < 0.05, compared to lighter-colored dots when FDRs  $\geq$  0.05. Negative and positive associations are represented in blue and red, respectively.

Source data are provided as a Source Data file.

aDC: activated dendritic cells; cDC: conventional dendritic cells; CLP: common lymphoid progenitor; CMP: common myeloid progenitor; DC: dendritic cells; GMP: granulocyte-macrophage progenitor; iDC: immature dendritic cells; MPP: multipotent progenitor; MSC: mesenchymal stem cell; NK: natural killer; PB: global pseudobulk; pDC: plasmacytoid dendritic cells; SA: spatial archetype; ST: spatial transcriptomics; Tcm: central memory T cells; Tem: effector memory T cells; Th1: type 1 helper; Th2: T helper 2; Tregs: regulatory T cells.



## Supplementary Figure 26

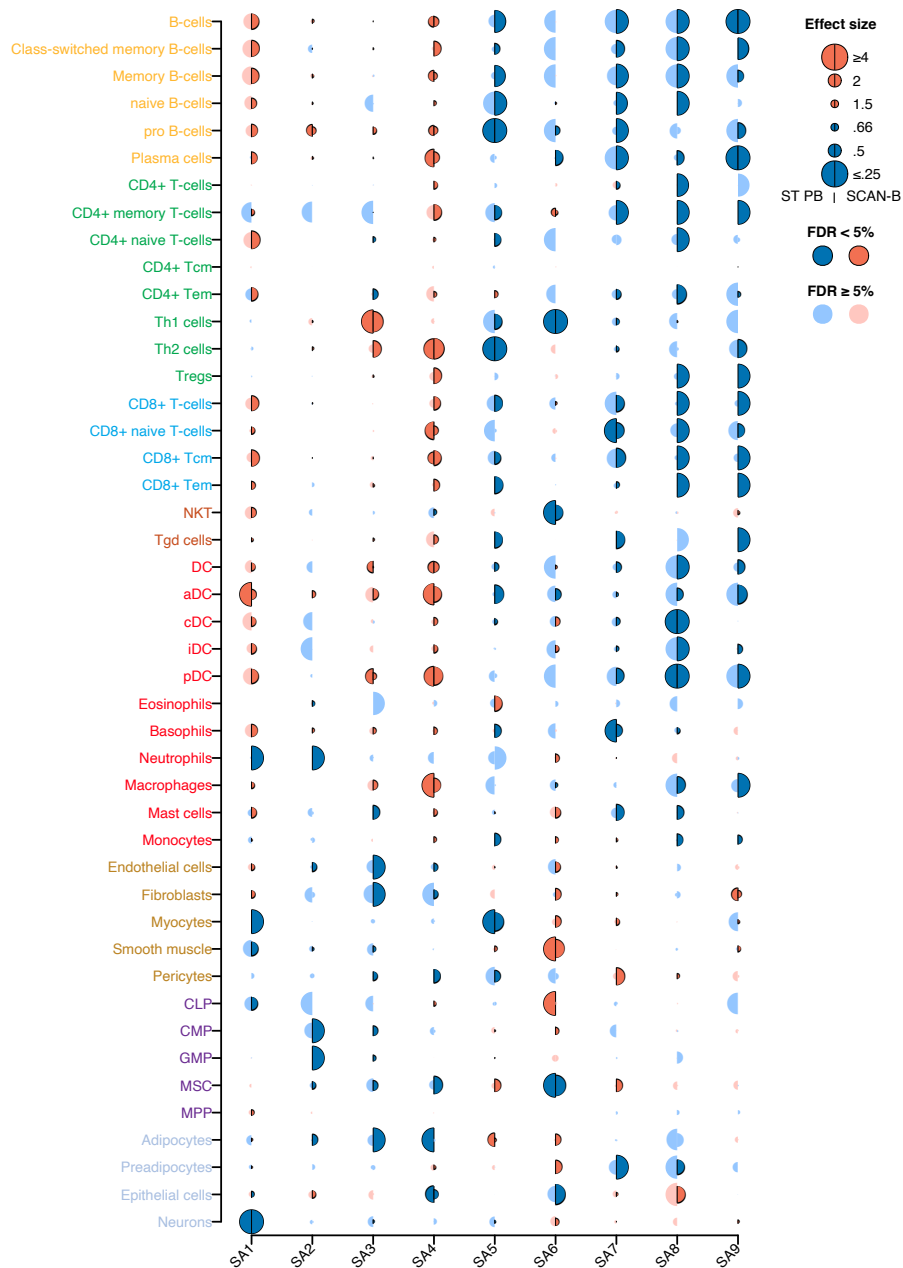

### Comparison of cell type enrichment analysis across the nine spatial archetypes in the ST TNBC ( $N = 94$ ) and SCAN-B TNBC cohorts ( $N = 672$ ).

Associations between cell type enrichment scored by xCell and spatial archetypes. The left half-circle represents ST TNBC global pseudobulk and the right half-circle represents SCAN-B TNBC cohort.

A logistic regression model was used to evaluate associations between each cell type enrichment score and each spatial archetype. P values were obtained from Wilcoxon rank sum tests and corrected for multi testing. Dots are bordered and dark-colored when FDRs < 0.05, compared to lighter-colored dots when FDRs ≥ 0.05. Negative and positive associations are represented in blue and red, respectively.

Source data are provided as a Source Data file.

aDC: activated dendritic cells; cDC: conventional dendritic cells; CLP: common lymphoid progenitor; CMP: common myeloid progenitor; DC: dendritic cells; GMP: granulocyte-macrophage progenitor; iDC: immature dendritic cells; MPP: multipotent progenitor; MSC: mesenchymal stem cell; NK:

natural killer; PB: global pseudobulk; pDC: plasmacytoid dendritic cells; SA: spatial archetype; ST: spatial transcriptomics; Tcm: central memory T cells; Tem: effector memory T cells; Th1: type 1 helper; Th2: T helper 2; Tregs: regulatory T cells.

# Supplementary Figure 27

**a**

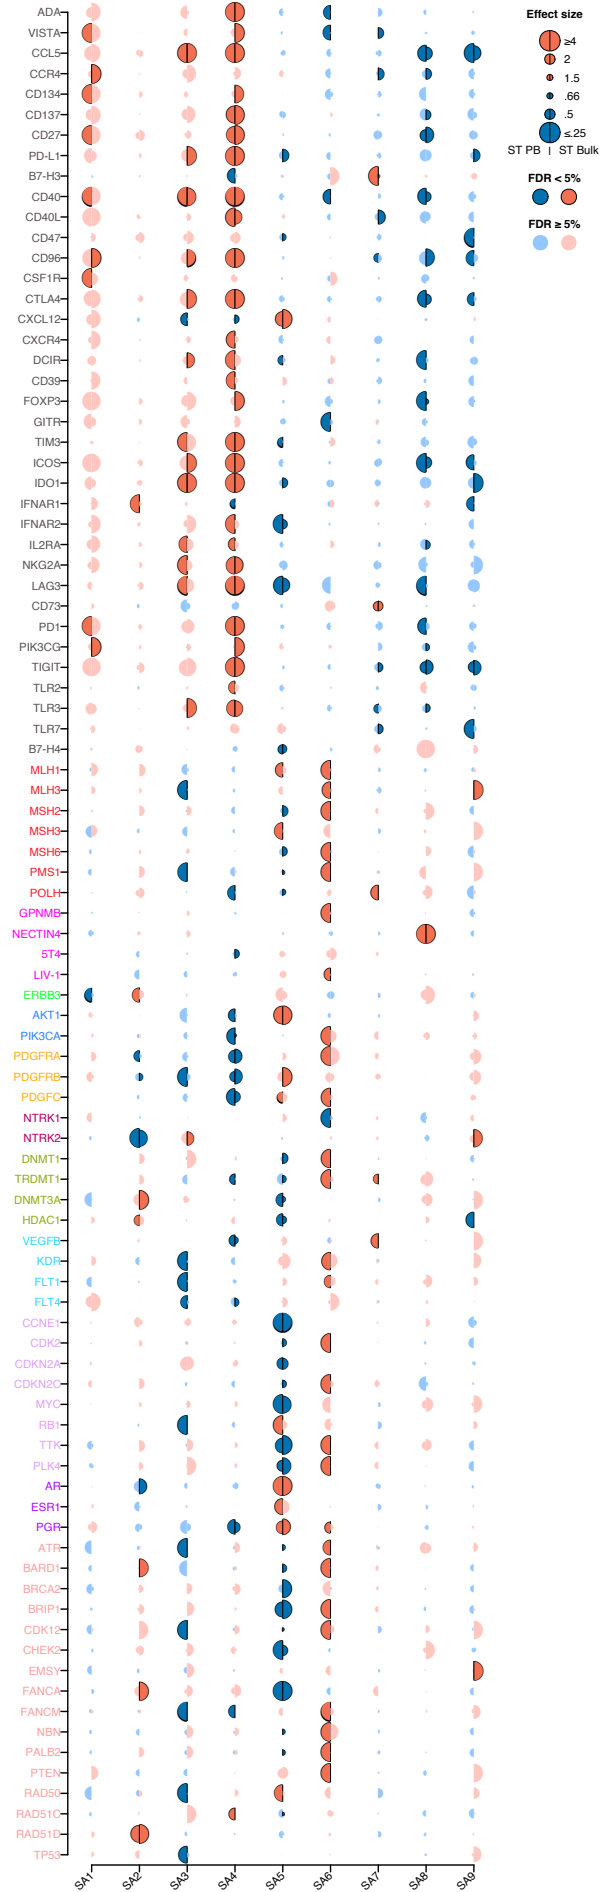

**b**

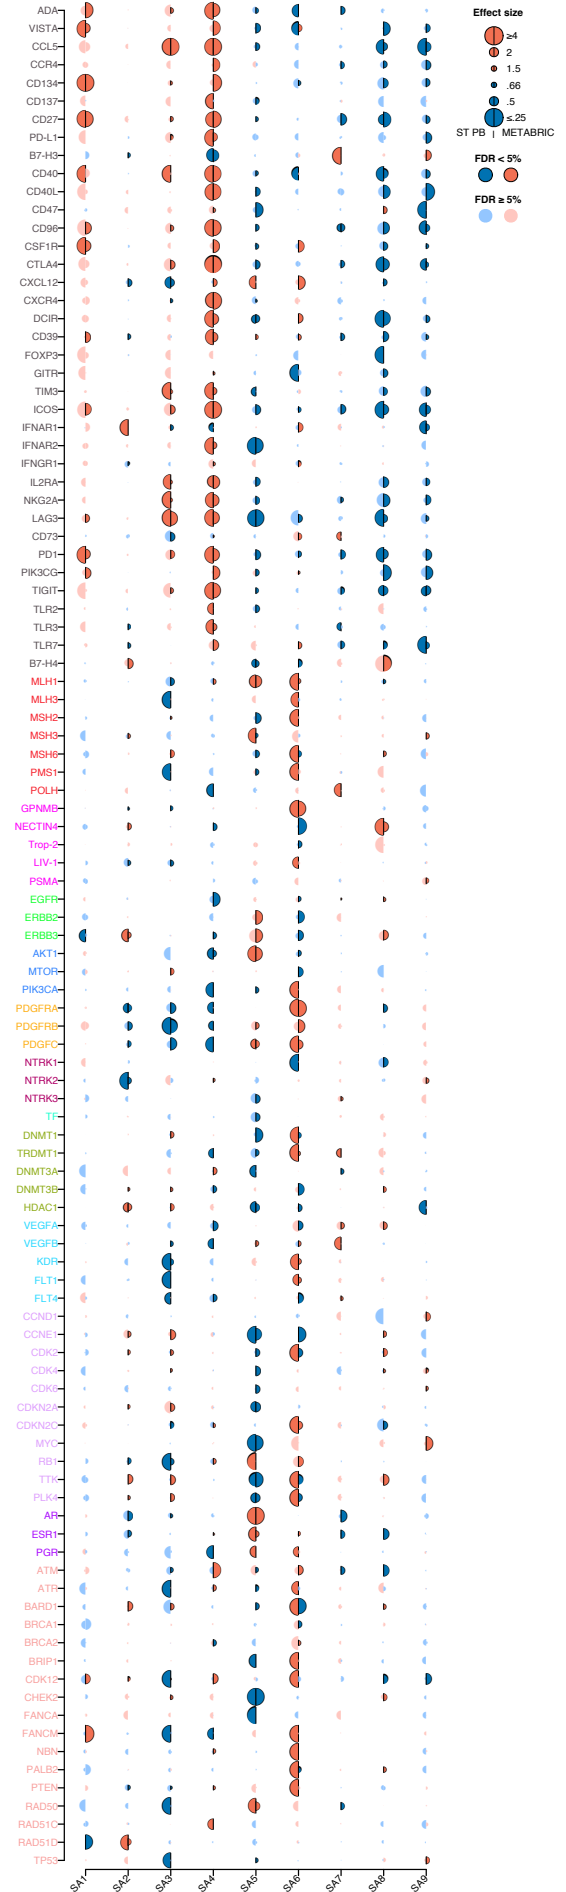

**Comparison of expression levels of single genes of interest across the nine spatial archetypes in the ST TNBC ( $N = 94$ ) and METABRIC TNBC cohorts ( $N = 335$ ).**

Association between the expression levels of genes of interest and spatial archetypes. The left half-circle represents ST TNBC global pseudobulk and the right half-circle represents **(a)** ST TNBC bulk RNA-seq, **(b)** METABRIC TNBC cohorts.

A logistic regression model was used to evaluate associations between each cell type enrichment score and each spatial archetype. P values were obtained from Wilcoxon rank sum tests and corrected for multi testing. Dots are bordered and dark-colored when FDRs  $< 0.05$ , compared to lighter-colored dots when FDRs  $\geq 0.05$ . Negative and positive associations are represented in blue and red, respectively.

Source data are provided as a Source Data file.

FDR: false-discovery rate; PB: global pseudobulk; SA: spatial archetype; ST: spatial transcriptomics.

## Supplementary Figure 28

### Comparison of expression levels of genes of interest across the nine spatial archetypes in the ST TNBC ( $N = 94$ ) and SCAN-B TNBC cohorts ( $N = 672$ ).

Association between the expression levels of single genes of interest and spatial archetypes in the ST TNBC and SCAN-B TNBC cohorts. The left half-circle and the right half-circle represent ST TNBC global pseudobulk and SCAN-B TNBC cohorts, respectively.

A logistic regression model was used to evaluate associations between each cell type enrichment score and each spatial archetype. P values were obtained from Wilcoxon rank sum tests and corrected for multi testing. Dots are bordered and dark-colored when FDRs  $< 0.05$ , compared to lighter-colored dots when FDRs  $\geq 0.05$ . Negative and positive associations are represented in blue and red, respectively.

Source data are provided as a Source Data file.

FDR: false-discovery rate; PB: global pseudobulk; SA: spatial archetype; ST: spatial transcriptomics.

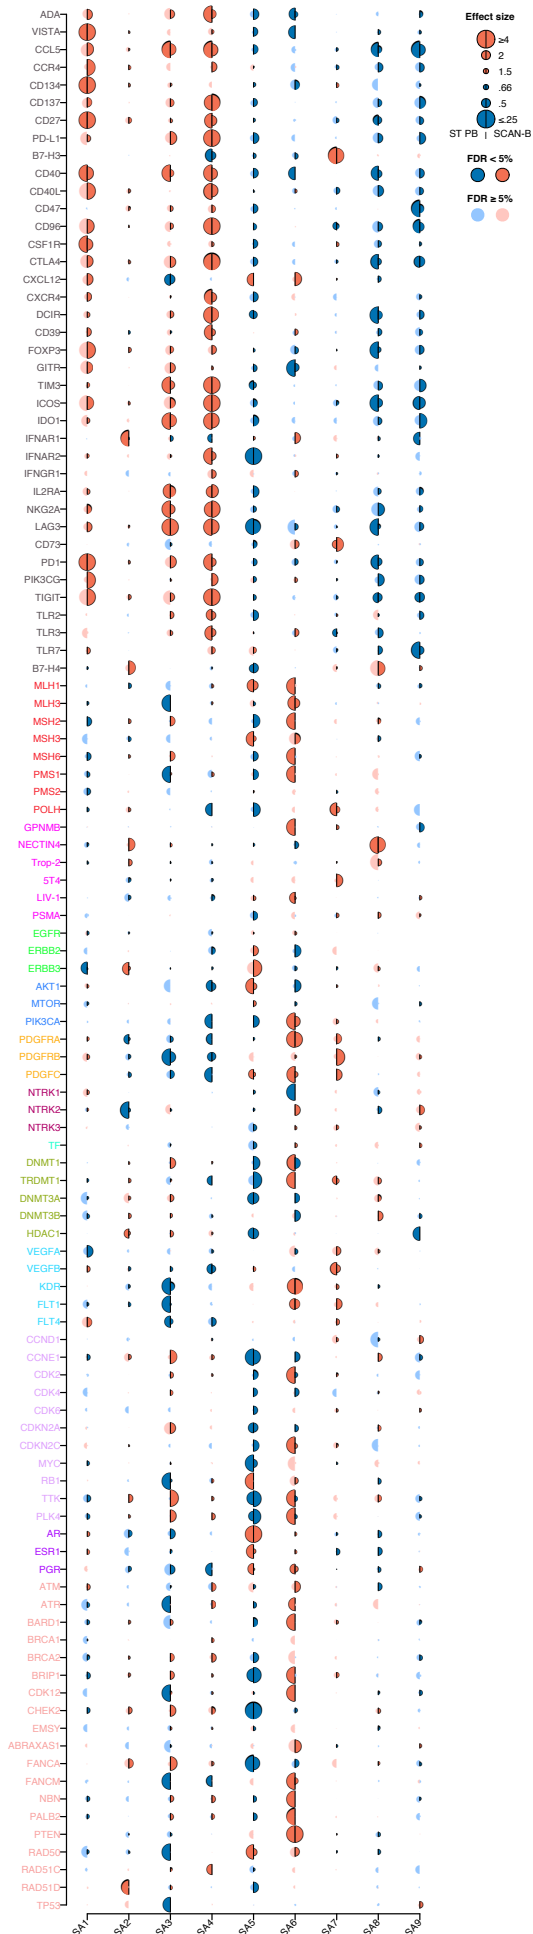

## Supplementary Figure 29

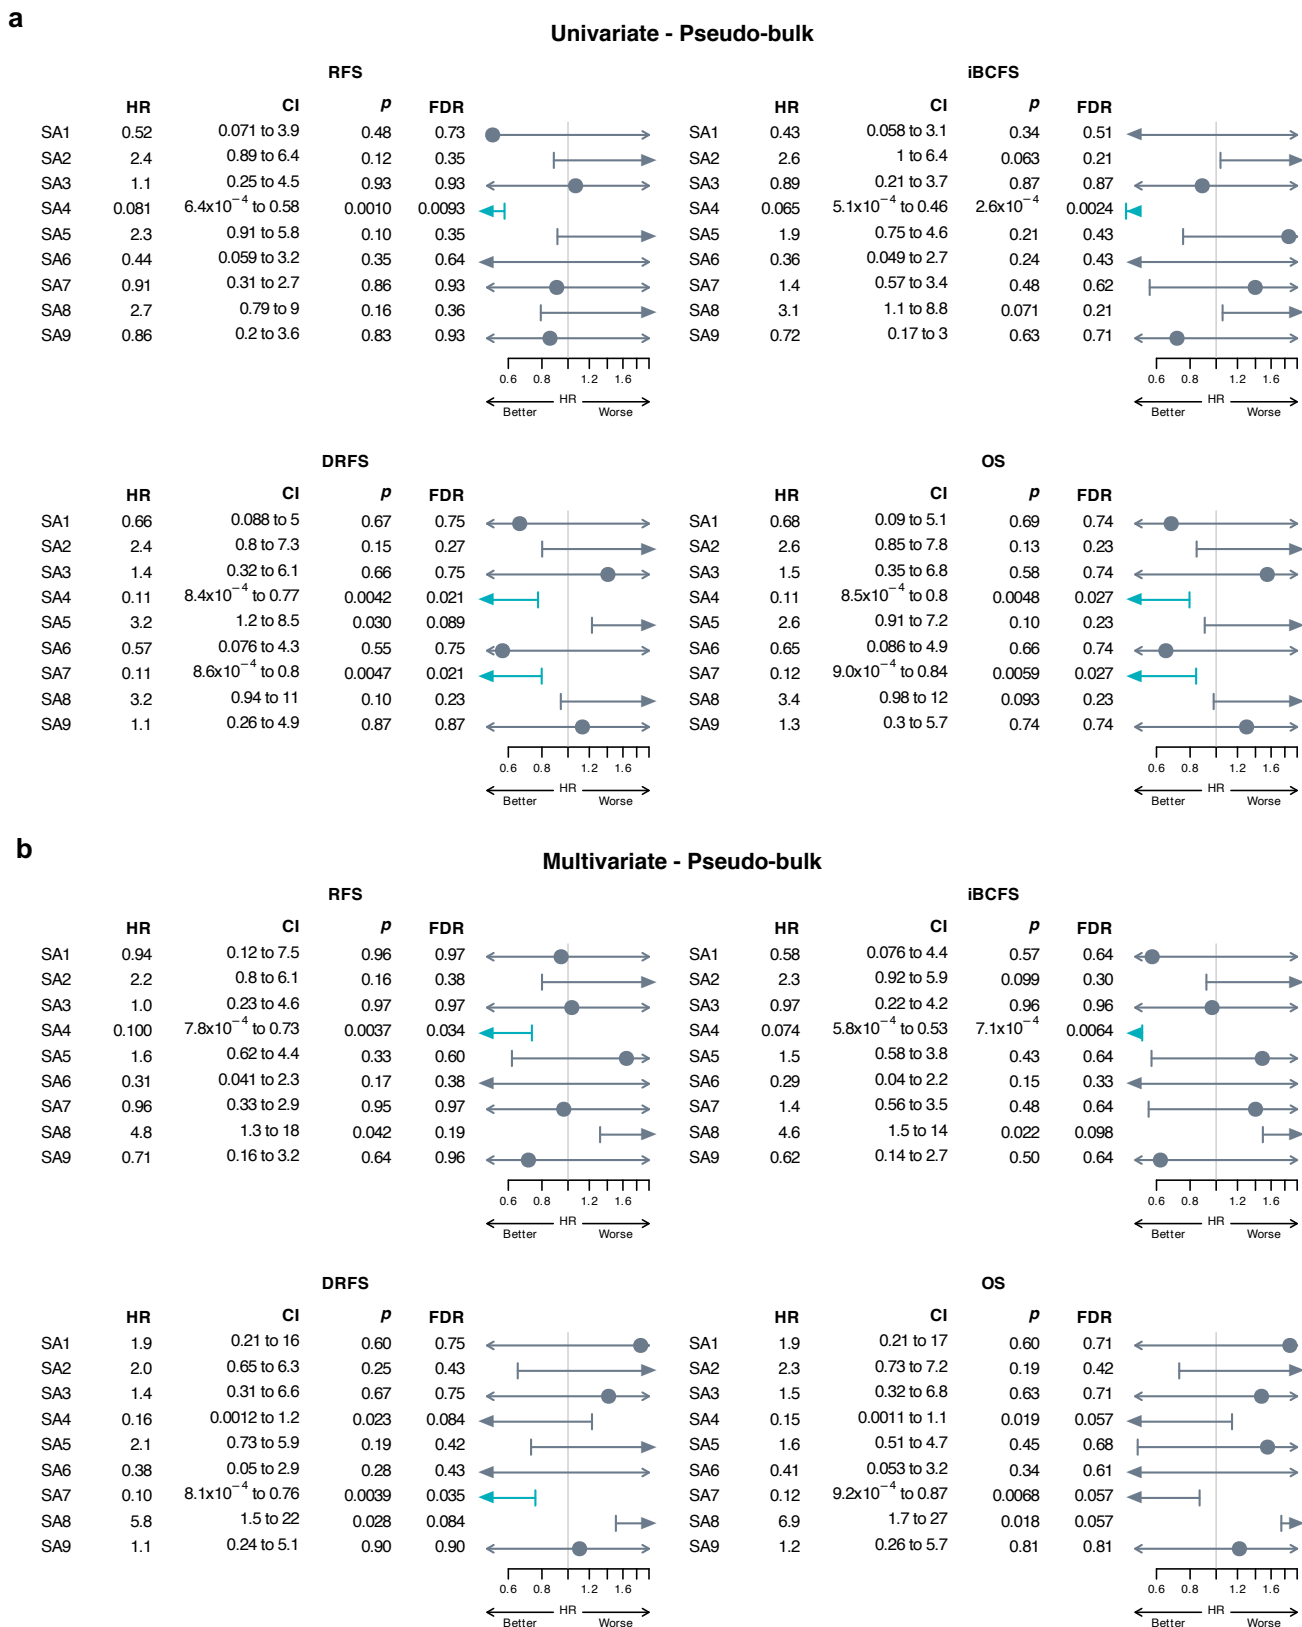

**Prognostic value of the nine spatial archetypes in the ST TNBC cohort (N = 94) using global ST pseudobulk data.**

**a** Forest plots of the 9 spatial archetypes for RFS, iBCFS, DRFS and OS, univariate analysis.

**b** Forest plots of the 9 spatial archetypes for RFS, iBCFS, DRFS and OS, multivariate analysis correcting for clinic-pathological parameters (age, tumor size, nodal status).

For univariate analysis, P values are from likelihood ratio test. When correcting for clinic-pathological characteristics, P values were obtained with a likelihood ratio test on nested Cox models. Significant

FDRs are shown in *blue* ( $< 0.05$ ). Circles indicate HR, and error bars the 95% confidence interval (95% CI).

Source data are provided as a Source Data file.

CI: confidence interval; DRFS: distant relapse-free survival; FDR: false-discovery rate; HR: hazard ratio; iBCFS: invasive breast cancer free survival; OS: overall survival; RFS; recurrence-free survival; SA: spatial archetype; ST: spatial transcriptomics; TNBC: triple negative breast cancer.

# Supplementary Figure 30

**a**

## Univariable - ST cohort (bulk RNA-seq)

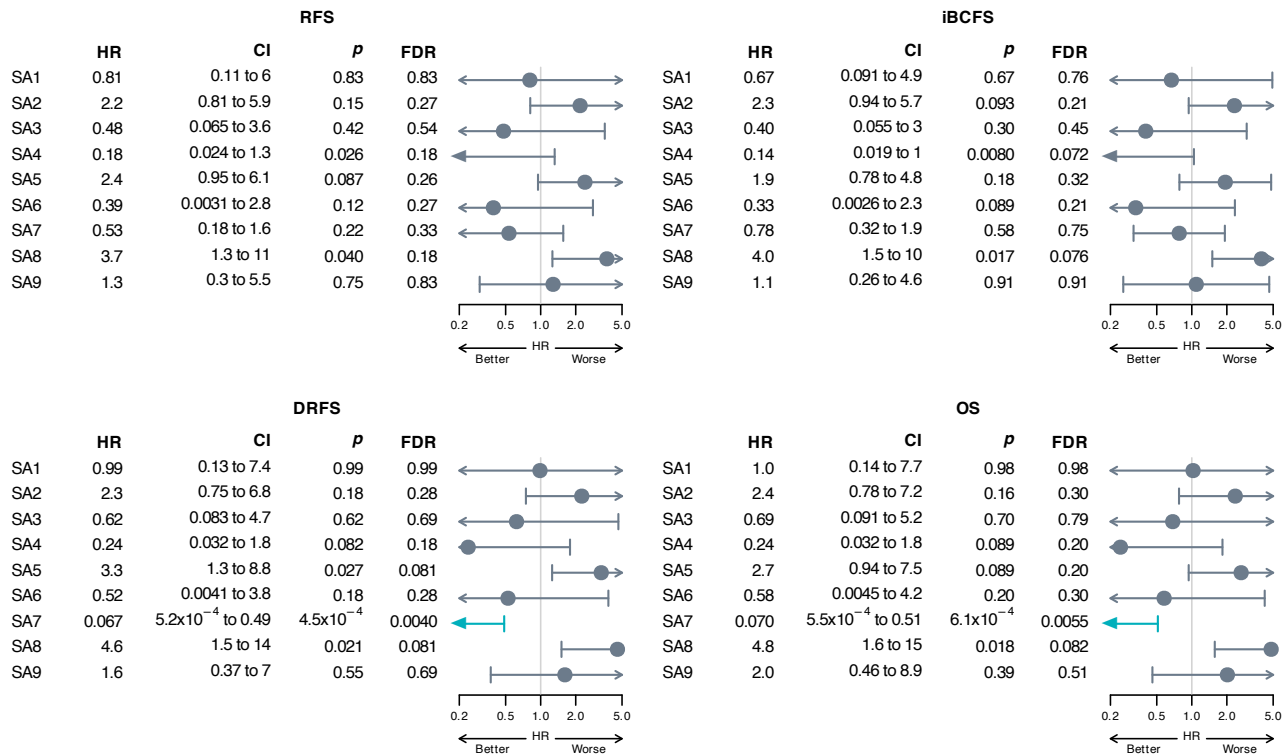

**b**

## Multivariable - ST cohort (bulk RNA-seq)

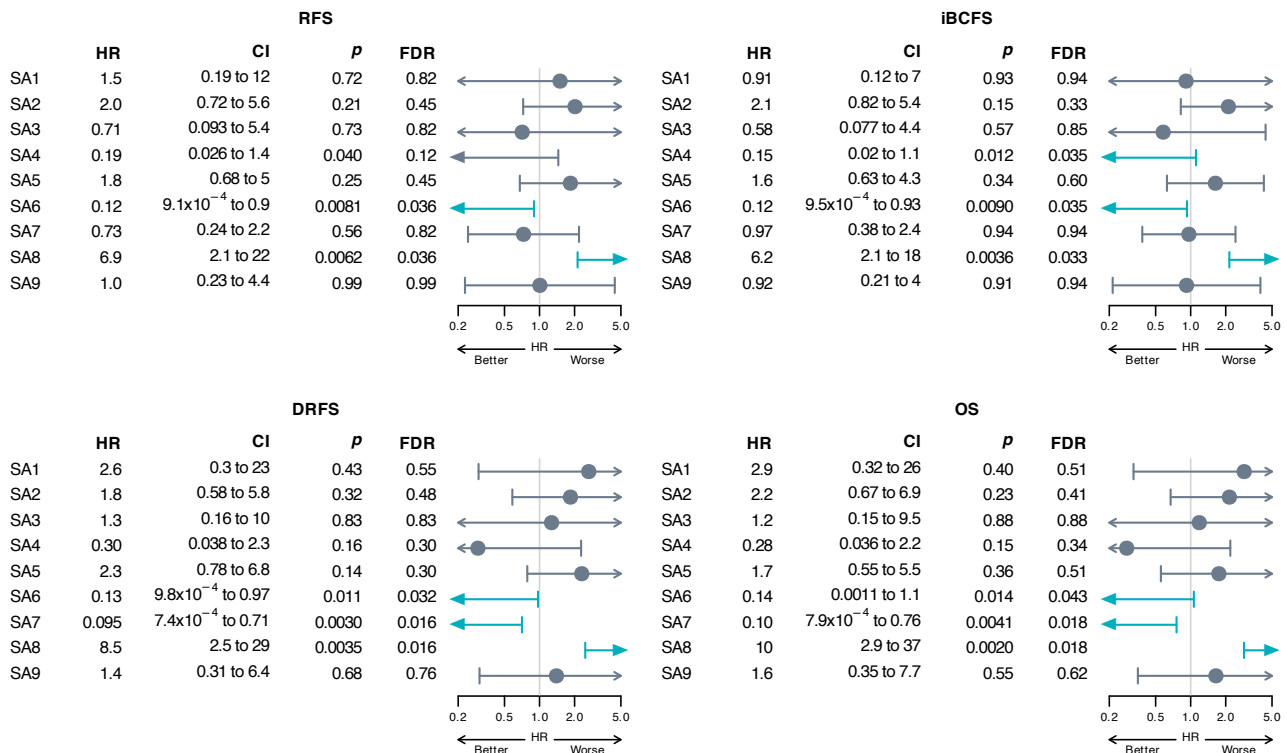

## Prognostic value of the nine spatial archetypes in the ST TNBC cohort (N = 94) using bulk RNA-seq data.

**a** Forest plots of the 9 spatial archetypes for RFS, iBCFS, DRFS and OS, univariate analysis.

**b** Forest plots of the 9 spatial archetypes for RFS, iBCFS, DRFS and OS, multivariate analysis correcting for clinic-pathological parameters (age, tumor size, nodal status).

For univariate analysis, P values are from likelihood ratio test. When correcting for clinic-pathological characteristics, P values were obtained with a likelihood ratio test on nested Cox models. Significant



FDRs are shown in blue ( $< 0.05$ ). Circles indicate HR, and error bars the 95% confidence interval (95% CI).

Source data are provided as a Source Data file.

CI: confidence interval; DRFS: distant relapse-free survival; FDR: false-discovery rate; HR: hazard ratio; iBCFS: invasive breast cancer free survival; OS: overall survival; RFS: recurrence-free survival; SA: spatial archetype; ST: spatial transcriptomics; TNBC: triple negative breast cancer.

# Supplementary Figure 31

**a**

## Univariable - METABRIC

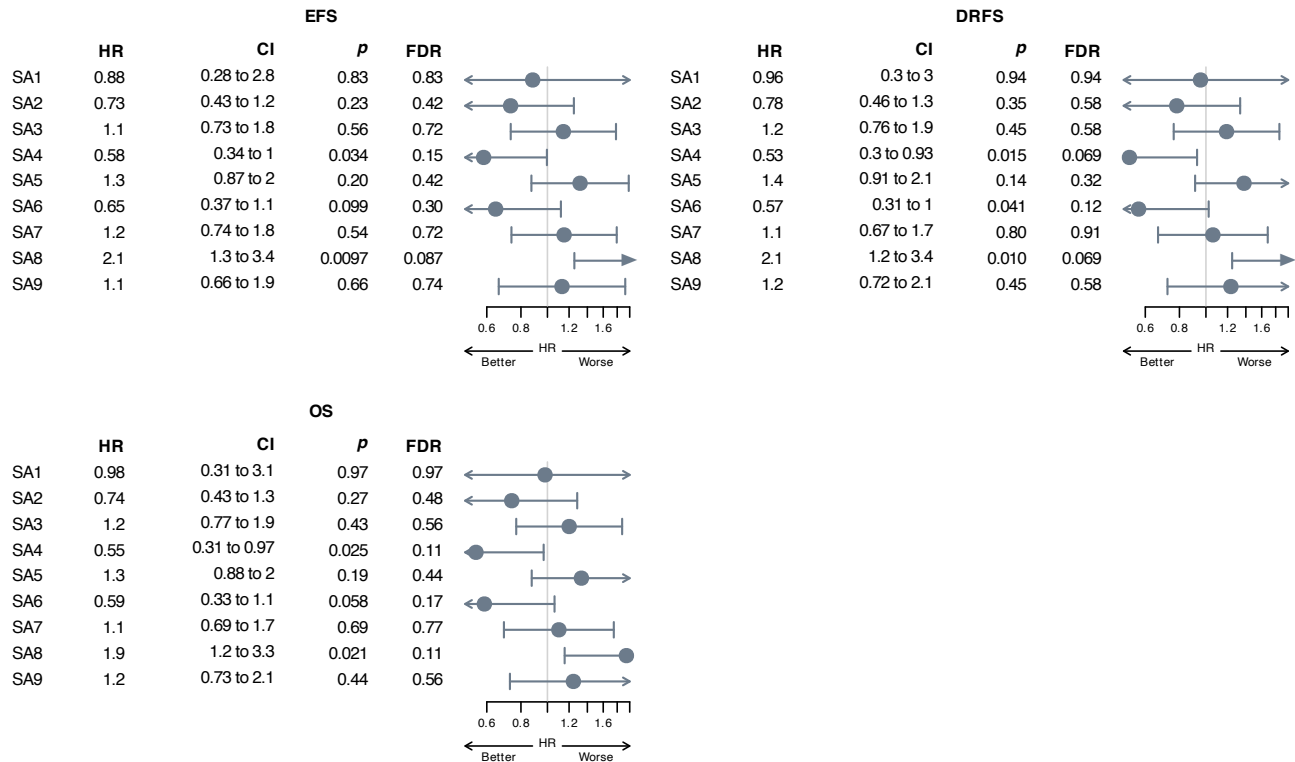

**b**

## Multivariable - METABRIC

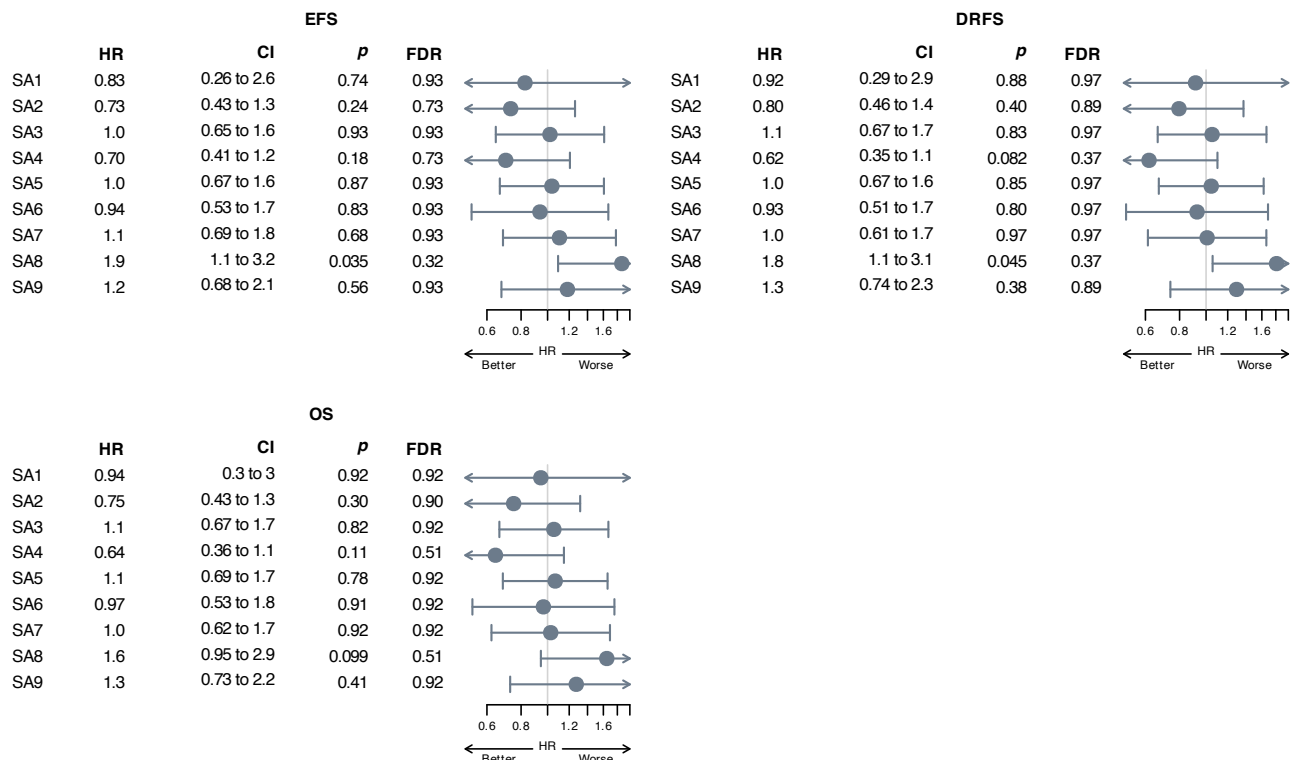

### Prognostic value of the nine spatial archetypes in the METABRIC TNBC cohort (N = 335) using bulk RNA-seq data.

**a** Forest plots of the 9 spatial archetypes for EFS, DRFS and OS, univariate analysis.

**b** Forest plots of the 9 spatial archetypes for EFS, DRFS and OS, multivariate analysis correcting for clinic-pathological parameters (age, tumor size, nodal status).

For univariate analysis, P values are from likelihood ratio test. When correcting for clinic-pathological characteristics, P values were obtained with a likelihood ratio test on nested Cox models. Significant

FDRs are shown in blue ( $< 0.05$ ). Circles indicate HR, and error bars the 95% confidence interval (95% CI).

Source data are provided as a Source Data file.

CI: confidence interval; DRFS: distant relapse-free survival; EFS: event-free survival; FDR: false-discovery rate; HR: hazard ratio; OS: overall survival; SA: spatial archetype.

# Supplementary Figure 32

**a**

## Univariable - SCAN-B

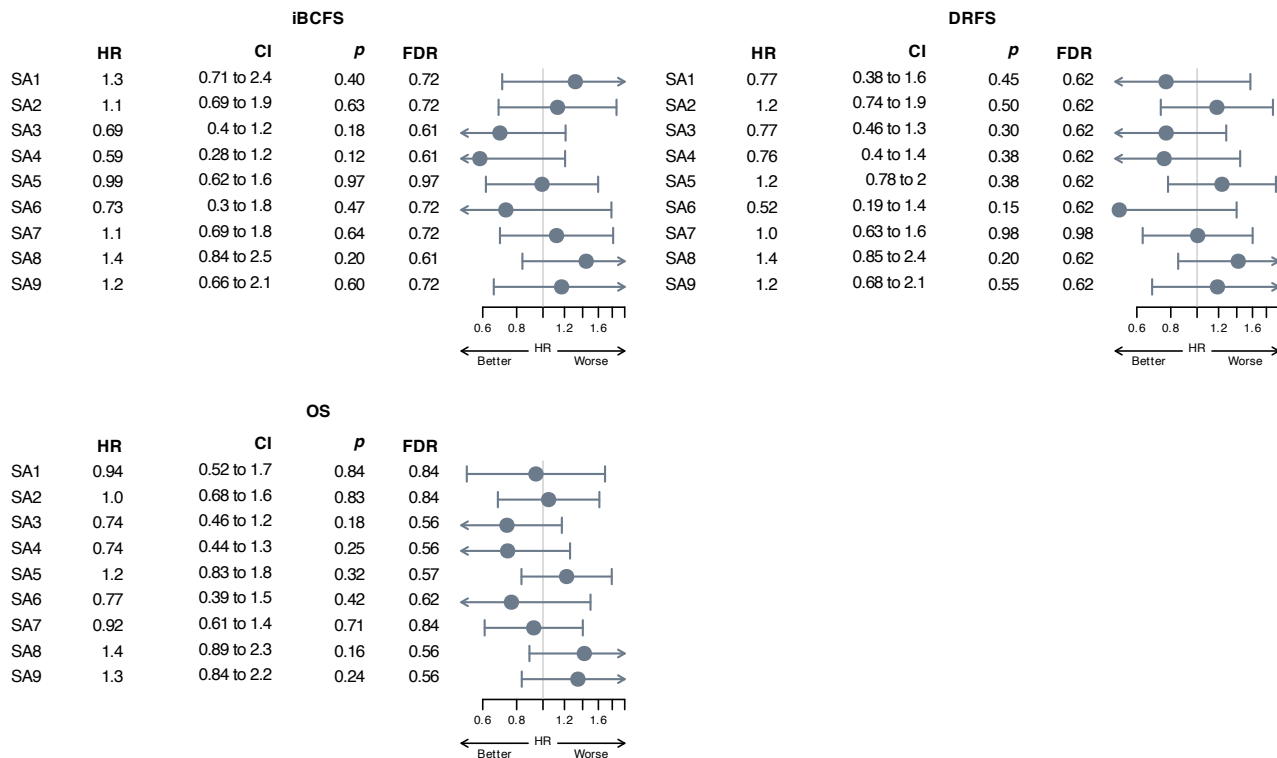

**b**

## Multivariable - SCAN-B

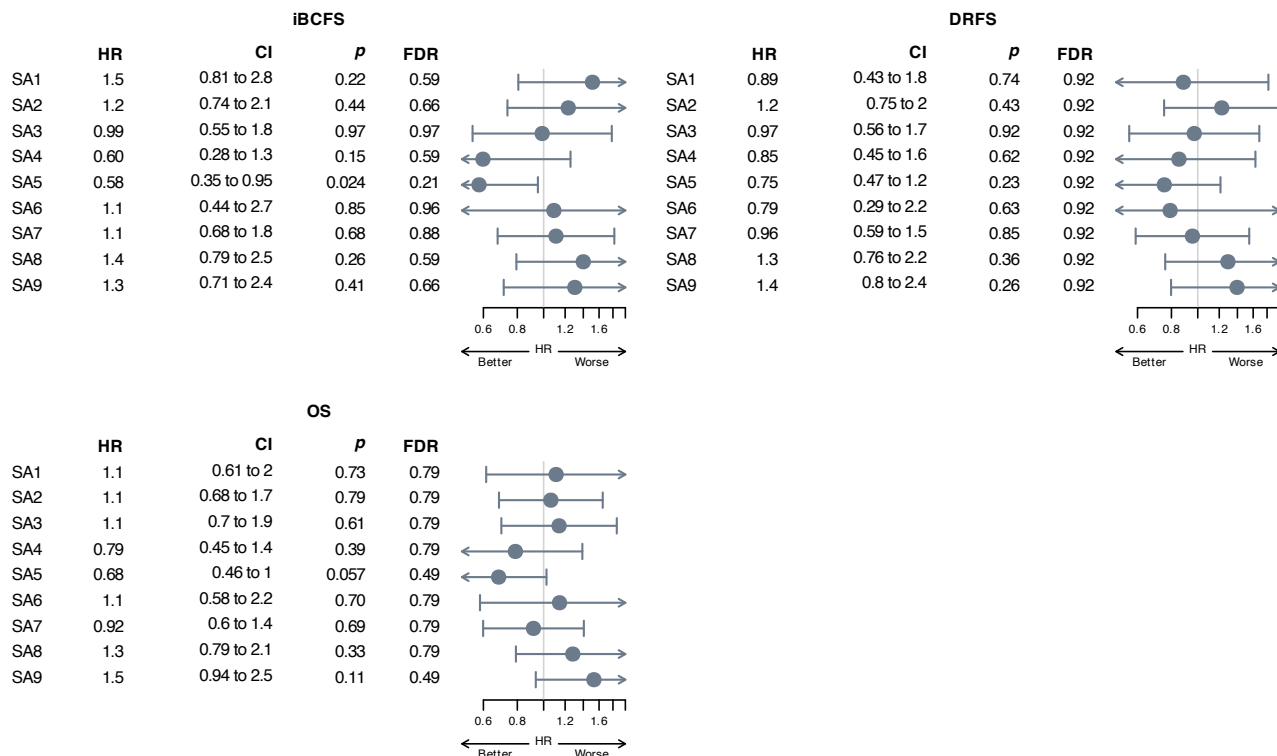

**Prognostic value of the nine spatial archetypes in the SCAN-B TNBC cohort (N = 672) using bulk RNA-seq data.**

**a** Forest plots of the 9 spatial archetypes for iBCFS, DRFS and OS, univariate analysis.

**b** Forest plots of the 9 spatial archetypes for iBCFS, DRFS and OS, multivariate analysis correcting for clinic-pathological parameters (age, tumor size, nodal status).

For univariate analysis, P values are from likelihood ratio test. When correcting for clinic-pathological characteristics, P values were obtained with a likelihood ratio test on nested Cox models. Significant FDRs are shown in *blue* (< 0.05). Circles indicate HR, and error bars the 95% confidence interval (95% CI).

Source data are provided as a Source Data file.

CI: confidence interval; DRFS: distant relapse-free survival; FDR: false-discovery rate; HR: hazard ratio; iBCFS: invasive breast cancer free survival; OS: overall survival; SA: spatial archetype.

# Supplementary Figure 33

a

## Univariable - All 3 studies

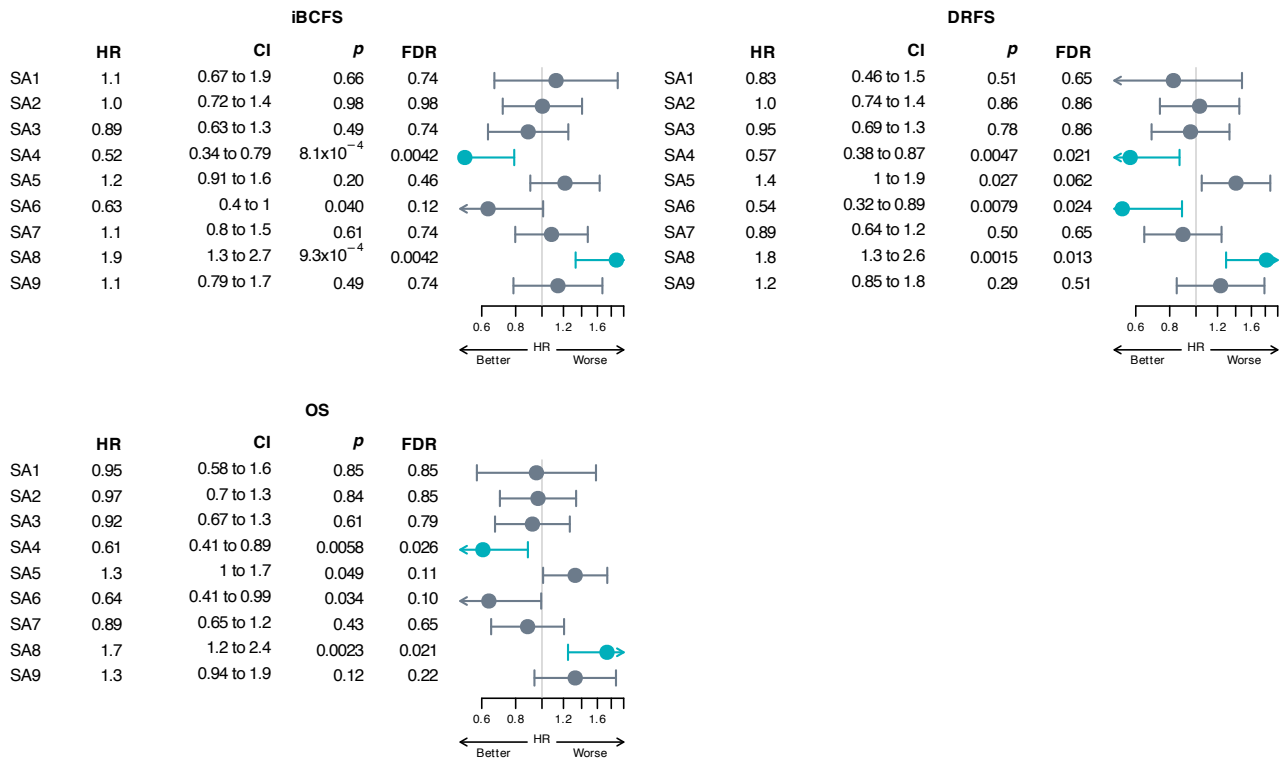

b

## Multivariable - All 3 studies

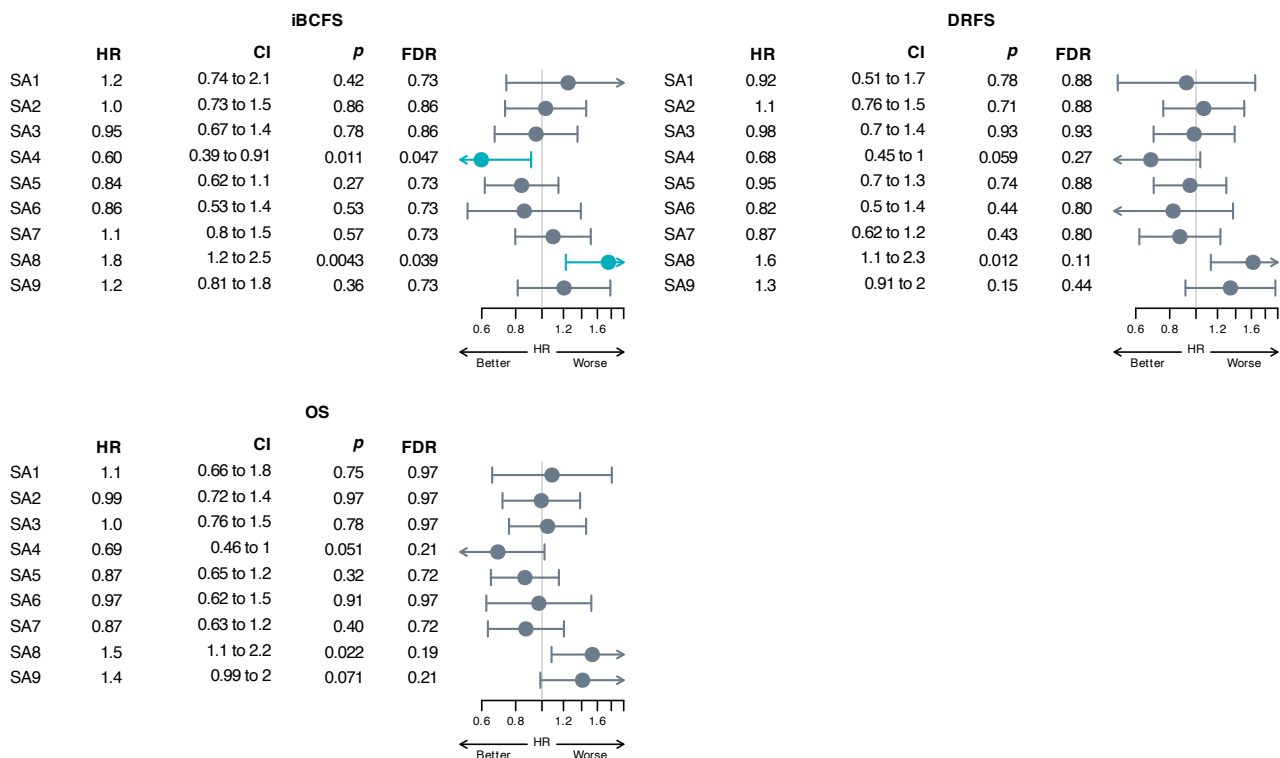

## Prognostic value of the nine spatial archetypes in the merged ST TNBC, METABRIC and SCAN-B TNBC cohorts (N = 1101) using bulk RNA-seq data.

a Forest plots of the 9 spatial archetypes for iBCFS, DRFS and OS, univariate analysis.

b Forest plots of the 9 spatial archetypes for iBCFS, DRFS and OS, multivariate analysis correcting for clinic-pathological parameters (age, tumor size, nodal status).

The endpoint of iBCFS defined on ST TNBC and SCAN-B cohorts included also EFS from the METABRIC cohort. For univariate analysis, P values are from likelihood ratio test. When correcting

for clinic-pathological characteristics, P values were obtained with a likelihood ratio test on nested Cox models. All analysis were stratified by study. Significant FDRs are shown in *blue* (< 0.05). Circles indicate HR, and error bars the 95% confidence interval (95% CI).

Source data are provided as a Source Data file.

CI: confidence interval; DRFS: distant relapse-free survival; FDR: false-discovery rate; HR: hazard ratio; iBCFS: invasive breast cancer free survival; OS: overall survival; SA: spatial archetype.

## SUPPLEMENTARY TABLES

**Supplementary Table 1: Patients' clinic-pathological characteristics of the global ST TNBC cohort and across each TNBC molecular subtype.**

|                            | Total (N = 92)    | BL<br>(N = 17)    | IM<br>(N = 25)    | LAR<br>(N = 11)   | M<br>(N = 27)     | MSL<br>(N = 12)   | P value                       |
|----------------------------|-------------------|-------------------|-------------------|-------------------|-------------------|-------------------|-------------------------------|
| <b>Age (years)</b>         |                   |                   |                   |                   |                   |                   |                               |
| <45                        | 24 (26.1%)        | 3 (17.6%)         | 7 (28.0%)         | 2 (18.2%)         | 10 (37.0%)        | 2 (16.7%)         | <b>0.596<sup>1</sup></b>      |
| ≥45                        | 68 (73.9%)        | 14 (82.4%)        | 18 (72.0%)        | 9 (81.8%)         | 17 (63.0%)        | 10 (83.3%)        |                               |
| <b>T size (cm)</b>         |                   |                   |                   |                   |                   |                   |                               |
| ≤2                         | 57 (62.0%)        | 8 (47.1%)         | 18 (72.0%)        | 6 (54.5%)         | 18 (66.7%)        | 7 (58.3%)         | <b>0.503<sup>1</sup></b>      |
| >2                         | 35 (38.0%)        | 9 (52.9%)         | 7 (28.0%)         | 5 (45.5%)         | 9 (33.3%)         | 5 (41.7%)         |                               |
| <b>Node status</b>         |                   |                   |                   |                   |                   |                   |                               |
| Negative                   | 72 (78.3%)        | 13 (76.5%)        | 21 (84.0%)        | 6 (54.5%)         | 21 (77.8%)        | 11 (91.7%)        | <b>0.293<sup>1</sup></b>      |
| Positive                   | 20 (21.7%)        | 4 (23.5%)         | 4 (16.0%)         | 5 (45.5%)         | 6 (22.2%)         | 1 (8.3%)          |                               |
| <b>HER2+ status (IHC)</b>  |                   |                   |                   |                   |                   |                   |                               |
| 0                          | 86 (93.5%)        | 14 (82.4%)        | 25 (100.0%)       | 10 (90.9%)        | 26 (96.3%)        | 11 (91.7%)        | <b>0.146<sup>1</sup></b>      |
| 1+                         | 6 (6.5%)          | 3 (17.6%)         | 0 (0.0%)          | 1 (9.1%)          | 1 (3.7%)          | 1 (8.3%)          |                               |
| <b>Grade</b>               |                   |                   |                   |                   |                   |                   |                               |
| I/II                       | 8 (8.9%)          | 1 (5.9%)          | 0 (0.0%)          | 4 (36.4%)         | 0 (0.0%)          | 3 (25.0%)         | <b>&lt; 0.001<sup>1</sup></b> |
| III                        | 82 (91.1%)        | 16 (94.1%)        | 24 (100.0%)       | 7 (63.6%)         | 26 (100.0%)       | 9 (75.0%)         |                               |
| Unknown                    | 2                 | 0                 | 1                 | 0                 | 1                 | 0                 |                               |
| <b>Ki67 (%)</b>            |                   |                   |                   |                   |                   |                   |                               |
| Median                     | 60.000            | 75.000            | 80.000            | 20.000            | 70.000            | 45.000            | <b>&lt; 0.001<sup>2</sup></b> |
| Q1, Q3                     | 40.000,<br>80.000 | 50.000,<br>90.000 | 60.000,<br>90.000 | 17.500,<br>30.000 | 40.000,<br>80.000 | 23.750,<br>62.500 |                               |
| <b>Histological type</b>   |                   |                   |                   |                   |                   |                   |                               |
| IDC                        | 76 (82.6%)        | 15 (88.2%)        | 17 (68.0%)        | 9 (81.8%)         | 24 (88.9%)        | 11 (91.7%)        | <b>0.013<sup>1</sup></b>      |
| ILC                        | 2 (2.2%)          | 0 (0.0%)          | 0 (0.0%)          | 1 (9.1%)          | 1 (3.7%)          | 0 (0.0%)          |                               |
| MED                        | 8 (8.7%)          | 1 (5.9%)          | 7 (28.0%)         | 0 (0.0%)          | 0 (0.0%)          | 0 (0.0%)          |                               |
| MET                        | 2 (2.2%)          | 1 (5.9%)          | 0 (0.0%)          | 0 (0.0%)          | 0 (0.0%)          | 1 (8.3%)          |                               |
| Other                      | 4 (4.3%)          | 0 (0.0%)          | 1 (4.0%)          | 1 (9.1%)          | 2 (7.4%)          | 0 (0.0%)          |                               |
| <b>sTILs (%)</b>           |                   |                   |                   |                   |                   |                   |                               |
| Median                     | 15.000            | 15.000            | 40.000            | 5.000             | 5.000             | 8.000             | <b>&lt; 0.001<sup>2</sup></b> |
| Q1, Q3                     | 5.000, 30.000     | 15.000,<br>20.000 | 30.000,<br>80.000 | 3.000, 10.000     | 0.000, 10.000     | 3.000, 20.000     |                               |
| <b>TIME by pathologist</b> |                   |                   |                   |                   |                   |                   |                               |
| FI                         | 17 (18.7%)        | 1 (5.9%)          | 15 (60.0%)        | 0 (0.0%)          | 0 (0.0%)          | 1 (9.1%)          | <b>&lt; 0.001<sup>1</sup></b> |
| ID                         | 23 (25.3%)        | 0 (0.0%)          | 0 (0.0%)          | 5 (45.5%)         | 13 (48.1%)        | 5 (45.5%)         |                               |
| MR                         | 18 (19.8%)        | 3 (17.6%)         | 2 (8.0%)          | 2 (18.2%)         | 8 (29.6%)         | 3 (27.3%)         |                               |



|                              |            |             |            |             |             |             |                          |
|------------------------------|------------|-------------|------------|-------------|-------------|-------------|--------------------------|
| SR                           | 33 (36.3%) | 13 (76.5%)  | 8 (32.0%)  | 4 (36.4%)   | 6 (22.2%)   | 2 (18.2%)   |                          |
| Unknown                      | 1          | 0           | 0          | 0           | 0           | 1           |                          |
| <b>Germline mutation</b>     |            |             |            |             |             |             |                          |
| No                           | 21 (58.3%) | 1 (33.3%)   | 10 (71.4%) | 3 (100.0%)  | 5 (41.7%)   | 2 (50.0%)   | <b>0.280<sup>1</sup></b> |
| <i>BRCA1</i>                 | 13 (36.1%) | 1 (33.3%)   | 4 (28.6%)  | 0 (0.0%)    | 6 (50.0%)   | 2 (50.0%)   |                          |
| <i>BRCA2</i>                 | 1 (2.8%)   | 1 (33.3%)   | 0 (0.0%)   | 0 (0.0%)    | 0 (0.0%)    | 0 (0.0%)    |                          |
| <i>CHEK2</i>                 | 1 (2.8%)   | 0 (0.0%)    | 0 (0.0%)   | 0 (0.0%)    | 1 (8.3%)    | 0 (0.0%)    |                          |
| Unknown                      | 56         | 14          | 11         | 8           | 15          | 8           |                          |
| <b>Adjuvant chemotherapy</b> |            |             |            |             |             |             |                          |
| No                           | 11 (12.1%) | 4 (23.5%)   | 2 (8.0%)   | 1 (10.0%)   | 3 (11.1%)   | 1 (8.3%)    | <b>0.666<sup>1</sup></b> |
| Yes                          | 80 (87.9%) | 13 (76.5%)  | 23 (92.0%) | 9 (90.0%)   | 24 (88.9%)  | 11 (91.7%)  |                          |
| Unknown                      | 1          | 0           | 0          | 1           | 0           | 0           |                          |
| <b>Adjuvant radiotherapy</b> |            |             |            |             |             |             |                          |
| No                           | 3 (3.3%)   | 0 (0.0%)    | 2 (8.0%)   | 1 (10.0%)   | 0 (0.0%)    | 0 (0.0%)    | <b>0.216<sup>1</sup></b> |
| Yes                          | 88 (96.7%) | 17 (100.0%) | 23 (92.0%) | 9 (90.0%)   | 27 (100.0%) | 12 (100.0%) |                          |
| Unknown                      | 1          | 0           | 0          | 1           | 0           | 0           |                          |
| <b>Logoregional relapse</b>  |            |             |            |             |             |             |                          |
| No                           | 81 (88.0%) | 16 (94.1%)  | 23 (92.0%) | 9 (81.8%)   | 23 (85.2%)  | 10 (83.3%)  | <b>0.747<sup>1</sup></b> |
| Yes                          | 11 (12.0%) | 1 (5.9%)    | 2 (8.0%)   | 2 (18.2%)   | 4 (14.8%)   | 2 (16.7%)   |                          |
| <b>Contralateral relapse</b> |            |             |            |             |             |             |                          |
| No                           | 85 (92.4%) | 15 (88.2%)  | 24 (96.0%) | 11 (100.0%) | 24 (88.9%)  | 11 (91.7%)  | <b>0.791<sup>1</sup></b> |
| Yes                          | 7 (7.6%)   | 2 (11.8%)   | 1 (4.0%)   | 0 (0.0%)    | 3 (11.1%)   | 1 (8.3%)    |                          |
| <b>Distant relapse</b>       |            |             |            |             |             |             |                          |
| No                           | 79 (85.9%) | 13 (76.5%)  | 24 (96.0%) | 6 (54.5%)   | 25 (92.6%)  | 11 (91.7%)  | <b>0.014<sup>1</sup></b> |
| Yes                          | 13 (14.1%) | 4 (23.5%)   | 1 (4.0%)   | 5 (45.5%)   | 2 (7.4%)    | 1 (8.3%)    |                          |
| <b>Death</b>                 |            |             |            |             |             |             |                          |
| No                           | 71 (77.2%) | 10 (58.8%)  | 23 (92.0%) | 6 (54.5%)   | 22 (81.5%)  | 10 (83.3%)  | <b>0.047<sup>1</sup></b> |
| Yes                          | 21 (22.8%) | 7 (41.2%)   | 2 (8.0%)   | 5 (45.5%)   | 5 (18.5%)   | 2 (16.7%)   |                          |

<sup>1</sup>Fisher's Exact Test for Count Data with simulated P value (based on 2000 replicates).

<sup>2</sup>Kruskal-Wallis rank sum test.

BL: basal-like; FI: full inflamed; ID: immune desert; IDC: invasive ductal carcinoma; ILC: invasive lobular carcinoma; IM: immunomodulatory; LAR: luminal androgen receptor; M: mesenchymal; MED: medullary carcinoma; MET: metaplastic carcinoma; MSL: mesenchymal stem-like; MR: margin restricted; SR: stroma restricted; TIME: Tumor Immune Micro-Environment; ST: spatial transcriptomics; sTILs: stromal tumor infiltrating lymphocytes; TNBC: triple negative breast cancer.

**Supplementary Table 2: Definition of the morphological annotations**  
(referred to **Figures 3a-c, Supplementary Figure 1**)

| <b>Fifteen Histomorphological Categories</b> | <b>Definition</b>                                                                                                                                                                                         | <b>Methods</b>                                                                                    | <b>Merged Histomorphological Categories</b>                        |
|----------------------------------------------|-----------------------------------------------------------------------------------------------------------------------------------------------------------------------------------------------------------|---------------------------------------------------------------------------------------------------|--------------------------------------------------------------------|
| Tumor cells (1)                              | Tumor cells                                                                                                                                                                                               | Machine learning based on training on different tumor cells across different areas of the section | Tumor = (1) + (2)                                                  |
| Stroma cells (3)                             | Main non-immune cellular component of the stroma = fibroblasts                                                                                                                                            | Machine learning based on training on different fibroblasts across different areas of the section | Stroma cells [A] = (3) + $\frac{1}{2}$ x (4) + $\frac{1}{2}$ x (5) |
| Lymphocytes (6)                              | Lymphocytes infiltrating the tumor (=TILs) but also lymphocyte distant from the tumor edge                                                                                                                | Machine learning based on training on different lymphocytes across different areas of the section | Lymphocytes = (6) + $\frac{1}{2}$ x (5)                            |
| Low TILs stroma (4)                          | Stroma including acellular stroma, stroma cells with estimated <30% lymphocytes on the area                                                                                                               | Manual delineation by the pathologist when application by machine learning tool is not feasible   | /                                                                  |
| High TILs stroma (5)                         | Stroma including acellular stroma, stroma cells with estimated $\geq$ 30% lymphocytes on the area                                                                                                         | Manual delineation by the pathologist when application by machine learning tool is not feasible   | /                                                                  |
| Acellular stroma(7)                          | Stroma without cells enriched by collagen fibers                                                                                                                                                          | Manual delineation                                                                                | Acellular stroma [B] = (7) + $\frac{1}{2}$ x (4)                   |
| Fat tissue (8)                               | Fat tissue                                                                                                                                                                                                | Manual delineation                                                                                | Stroma or Total stroma = [A] + [B]                                 |
| Necrosis (9)                                 | Necrosis which could be infiltrated by immune cells                                                                                                                                                       | Manual delineation                                                                                | Fat tissue = (8)                                                   |
| In situ (10)                                 | Carcinoma in situ                                                                                                                                                                                         | Manual delineation                                                                                | Necrosis = (9)                                                     |
| Tertiary lymphoid structures (11)            | Tertiary lymphoid structure including a dense cellular aggregate (GC) or lymphoid aggregates and lymphoid follicles without GC and consisted of CD20-positive B zones with CD3-positive T zone aggregates | Manual delineation                                                                                | In situ = (10)                                                     |
| Vessels (12)                                 | Vessel                                                                                                                                                                                                    | Manual delineation                                                                                | TLS = (11)                                                         |
| Lactiferous ducts (13)                       | Normal ductal glands including those with hyperplasia                                                                                                                                                     | Manual delineation                                                                                | Vessels = (12)                                                     |
| Nerves (14)                                  | Nerve                                                                                                                                                                                                     | Manual delineation                                                                                | Lactiferous ducts = (13)                                           |
| Heterologous element (15)                    | Ectopic structures as bone, teeth...                                                                                                                                                                      | Manual delineation                                                                                | Nerves = (14)                                                      |
| Tumor region (2)                             | Area with majority of tumor cells                                                                                                                                                                         | Manual delineation by the pathologist when application by machine learning tool is not feasible   | Heterologous element = (15)                                        |
| <b>2 Technical categories</b>                | <b>Definition</b>                                                                                                                                                                                         | <b>Methods</b>                                                                                    |                                                                    |
| Whitespace                                   | Whitespace without any histological structures or false intercellular spaces due to frozen artefact                                                                                                       | Manual delineation                                                                                | /                                                                  |
| Artefact                                     | Technical issues as tissue folds which should be excluded from the spot selection for the analysis                                                                                                        | Manual delineation                                                                                | /                                                                  |

**Supplementary Table 3: Definition of the nine grouped histomorphological categories for the regression**  
 (referred to **Supplementary Figure 2a**)

| 9 grouped categories         | Definition                                                                                                                                                                                                |
|------------------------------|-----------------------------------------------------------------------------------------------------------------------------------------------------------------------------------------------------------|
| Tumor                        | Sum of Tumor cells and Tumor region annotations                                                                                                                                                           |
| Stroma                       | Total stroma = sum of Stroma cell, Low TIL stroma, acellular stroma and half of High TIL stroma                                                                                                           |
| Necrosis                     |                                                                                                                                                                                                           |
| Fat tissue                   | Fat tissue                                                                                                                                                                                                |
| Vessels                      | Vessels                                                                                                                                                                                                   |
| In situ                      | Carcinoma in situ                                                                                                                                                                                         |
| Tertiary lymphoid structures | Tertiary lymphoid structure including a dense cellular aggregate (GC) or lymphoid aggregates and lymphoid follicles without GC and consisted of CD20-positive B zones with CD3-positive T zone aggregates |
| Lymphocytes                  | Sum of Lymphocytes and half of High TIL stroma annotations                                                                                                                                                |
| Lactiferous ducts            | Normal ductal glands including those with hyperplasia                                                                                                                                                     |

**Supplementary Table 4: List of the expressed-based signatures**

| Class              | Signature                                               | Abbreviation                                                              | Source                |
|--------------------|---------------------------------------------------------|---------------------------------------------------------------------------|-----------------------|
| Cellular component | Peroxisome                                              | /                                                                         | MSigDB Hallmarks v7.0 |
|                    | Apical junction                                         | /                                                                         | MSigDB Hallmarks v7.0 |
|                    | Apical surface                                          | /                                                                         | MSigDB Hallmarks v7.0 |
| Development        | Myogenesis                                              | /                                                                         | MSigDB Hallmarks v7.0 |
|                    | Epithelial mesenchymal transition                       | /                                                                         | MSigDB Hallmarks v7.0 |
|                    | Angiogenesis                                            | /                                                                         | MSigDB Hallmarks v7.0 |
|                    | Adipogenesis                                            | /                                                                         | MSigDB Hallmarks v7.0 |
| Stroma             | Stroma1                                                 | /                                                                         | PMID_19122658         |
|                    | Stroma2                                                 | /                                                                         | PMID_18698033         |
|                    | ecm-myCAF                                               | Extracellular matrix myofibroblastic cancer associated fibroblast S1      | PMID_32434947         |
|                    | TGFbeta-myCAF                                           | TGFbeta signaling pathway myofibroblastic cancer associated fibroblast S1 | PMID_32434947         |
|                    | wound-myCAF                                             | Wound healing myofibroblastic cancer associated fibroblast S1             | PMID_32434947         |
|                    | detox-iCAF                                              | Detoxification pathway inflammatory cancer associated fibroblast S1       | PMID_32434947         |
|                    | IL-iCAF                                                 | IL pathway inflammatory cancer associated fibroblast S1                   | PMID_32434947         |
|                    | IFNgamma-iCAF                                           | Interferon gamma signaling pathway cancer associated fibroblast S1        | PMID_32434947         |
|                    | Normal fibroblast                                       | Normal fibroblast                                                         | PMID_32434947         |
| CAF                | Cancer associated fibroblast S1                         | PMID_29455927                                                             |                       |
| Immune             | Interferon gamma response                               | /                                                                         | MSigDB Hallmarks v7.0 |
|                    | Interferon alpha response                               | /                                                                         | MSigDB Hallmarks v7.0 |
|                    | Inflammatory response                                   | /                                                                         | MSigDB Hallmarks v7.0 |
|                    | IL6 JAK STAT3 signaling                                 | /                                                                         | MSigDB Hallmarks v7.0 |
|                    | IL2 STAT5 signaling                                     | /                                                                         | MSigDB Hallmarks v7.0 |
|                    | Complement                                              | /                                                                         | MSigDB Hallmarks v7.0 |
|                    | Coagulation                                             | /                                                                         | MSigDB Hallmarks v7.0 |
|                    | TNFA signaling via NF-kB                                | /                                                                         | MSigDB Hallmarks v7.0 |
|                    | Immune1                                                 | /                                                                         | PMID_17683518         |
|                    | Immune2                                                 | /                                                                         | PMID_18698033         |
|                    | TAM                                                     | Tumor associated macrophage                                               | PMID_30930117         |
|                    | Trm                                                     | Tissue-resident memory CD8 T cells                                        | PMID_36026440         |
|                    | TLS Cabrita                                             | Tertiary lymphoid structures by Cabrita et al                             | PMID_31942071         |
|                    | TLS Meylan                                              | Tertiary lymphoid structures by Meylan et al                              | PMID_35231421         |
|                    | TLS Lundeberg                                           | Tertiary lymphoid structures by Lundeberg et al                           | PMID_34650042         |
| TLS ST             | Tertiary lymphoid structures by spatial transcriptomics | In-house developed 30-gene TLS ST signature                               |                       |
| Metabolic          | Xenobiotic metabolism                                   | /                                                                         | MSigDB Hallmarks v7.0 |
|                    | Oxidative phosphorylation                               | /                                                                         | MSigDB Hallmarks v7.0 |

|               |                                 |                                                  |                       |
|---------------|---------------------------------|--------------------------------------------------|-----------------------|
|               | Glycolysis                      | /                                                | MSigDB Hallmarks v7.0 |
|               | Fatty acid metabolism           | /                                                | MSigDB Hallmarks v7.0 |
|               | Bile acid metabolism            | /                                                | MSigDB Hallmarks v7.0 |
|               | Heme metabolism                 | /                                                | MSigDB Hallmarks v7.0 |
|               | Cholesterol homeostasis         | /                                                | MSigDB Hallmarks v7.0 |
| Pathway       | Protein secretion               | /                                                | MSigDB Hallmarks v7.0 |
|               | Hypoxia                         | /                                                | MSigDB Hallmarks v7.0 |
|               | Apoptosis                       | /                                                | MSigDB Hallmarks v7.0 |
|               | Unfolded protein response       | /                                                | MSigDB Hallmarks v7.0 |
|               | Reactive oxygen species pathway | /                                                | MSigDB Hallmarks v7.0 |
|               | p53 pathway                     | /                                                | MSigDB Hallmarks v7.0 |
| Proliferation | MYC targets v2                  | /                                                | MSigDB Hallmarks v7.0 |
|               | MYC targets v1                  | /                                                | MSigDB Hallmarks v7.0 |
|               | Mitotic spindle                 | /                                                | MSigDB Hallmarks v7.0 |
|               | E2F targets                     | /                                                | MSigDB Hallmarks v7.0 |
|               | G2M checkpoint                  | /                                                | MSigDB Hallmarks v7.0 |
|               | GGI                             | Genomic grade index                              | PMID_16478745         |
|               | CIN70                           | /                                                | PMID_16921376         |
| GENE70        | /                               | PMID_11823860                                    |                       |
| Signaling     | WNT beta catenin signaling      | /                                                | MSigDB Hallmarks v7.0 |
|               | TGF beta signaling              | /                                                | MSigDB Hallmarks v7.0 |
|               | PI3K AKT mTOR signaling         | /                                                | MSigDB Hallmarks v7.0 |
|               | KRAS signaling                  | /                                                | MSigDB Hallmarks v7.0 |
|               | Hedgehog signaling              | /                                                | MSigDB Hallmarks v7.0 |
|               | Estrogen response late          | /                                                | MSigDB Hallmarks v7.0 |
|               | Estrogen response early         | /                                                | MSigDB Hallmarks v7.0 |
|               | Androgen response               | /                                                | MSigDB Hallmarks v7.0 |
|               | mTORC1 signaling                | /                                                | MSigDB Hallmarks v7.0 |
|               | NOTCH signaling                 | /                                                | MSigDB Hallmarks v7.0 |
|               | AR gene                         | /                                                | single gene           |
| ESR1 gene     | /                               | single gene                                      |                       |
| DNA damage    | Parpi7                          | Parp inhibitor 7                                 | PMID_35623341         |
|               | VCpred_TN                       | Veliparib carboplatin prediction triple negative | PMID_35623341         |
|               | DNA repair                      | /                                                | MSigDB Hallmarks v7.0 |

**Supplementary Table 5: List of the single genes of interest**

| Class       | Gene names                  | Full Name                                                 | Role                                               | Function in immune response                                    |
|-------------|-----------------------------|-----------------------------------------------------------|----------------------------------------------------|----------------------------------------------------------------|
| Immune      | <i>ADA</i>                  | Adenosine deaminase                                       | Catalyzation of hydrolysis of adenosine to inosine | positive immune regulation - adenosine pathway                 |
|             | <i>ADORA2A</i>              | Adenosine A2A receptor                                    | adenosine receptor                                 | immunosuppression - adenosine pathway                          |
|             | <i>VISTA</i>                | V-domain containing Ig Suppressor of T cell activation    | Immunomodulatory ligand                            | T cell co-signaling pathway -negative immune regulation        |
|             | <i>CCL5</i>                 | CC-chemokine ligand 5                                     | chemokine-ligand                                   | mixed leukocyte recruitment                                    |
|             | <i>CCR4</i>                 | CC-chemokine receptor 4                                   | chemokine-receptor                                 | NK cell, T cell recruitment                                    |
|             | <i>CCR8</i>                 | CC-chemokine receptor 8                                   | chemokine-receptor                                 | lymphocyte and DC homing                                       |
|             | <i>CD134</i>                | TNF-receptor superfamily member 4                         | immune checkpoint stimulatory receptor             | positive immune regulation                                     |
|             | <i>CD137</i>                | Cluster of differentiation 137                            | immune checkpoint stimulatory receptor             | positive immune regulation                                     |
|             | <i>CD27</i>                 | TNF-receptor superfamily member 7                         | immune checkpoint stimulatory receptor             | positive immune regulation                                     |
|             | <i>PD-L1</i>                | Programmed Death-1 ligand                                 | Immunomodulatory ligand                            | T cell co-signaling pathway -negative immune regulation        |
|             | <i>B7-H3</i>                | B7 superfamily molecule                                   | Immunomodulatory ligand                            | T cell co-signaling pathway -negative immune regulation        |
|             | <i>CD40</i>                 | TNF-receptor superfamily member 5                         | immune checkpoint stimulatory receptor             | positive immune regulation                                     |
|             | <i>CD40L</i>                | Cluster of differentiation 40-ligand                      | Immunomodulatory ligand                            | T and B cell co-signaling pathway - positive immune regulation |
|             | <i>CD47</i>                 | integrin-associated protein                               | Immunomodulatory ligand                            | negative immune regulation of myeloid cells                    |
|             | <i>CD96</i>                 | tactile                                                   | immune checkpoint inhibitory receptor              | negative immune regulation of NK cells and T cells             |
|             | <i>CSF1R</i>                | Colony stimulating factor 1 receptor                      | cytokine receptor                                  | production, differentiation and function of macrophages        |
|             | <i>CTLA4</i>                | Cytotoxic T-lymphocyte-associated molecule 4              | immune checkpoint inhibitory receptor              | T cell co-signaling pathway -negative immune regulation        |
|             | <i>CXCL12</i>               | C-X-C chemokine ligand-12 (stromal cell-derived factor 1) | chemokine-ligand                                   | mixed leukocyte recruitment                                    |
|             | <i>CXCR4</i>                | C-X-C chemokine receptor type 4                           | chemokine-receptor                                 | mixed leukocyte recruitment                                    |
|             | <i>DCIR</i>                 | Dendritic Cell Immuno Receptor                            | immune checkpoint inhibitory receptor              | innate immune system - negative regulation                     |
|             | <i>CD39</i>                 | Cluster of differentiation 39                             | ectoenzyme generating AMP                          | immunosuppression - adenosine pathway                          |
|             | <i>FOXP3</i>                | Forkhead box P3                                           | Transcription factor                               | Treg marker                                                    |
|             | <i>GITR</i>                 | Glucocorticoid-Induced TNF Receptor                       | TNF receptor superfamily                           | Negative immune regulation of Treg                             |
|             | <i>TIM3</i>                 | T-cell Ig and Mucin-domain-Molecule 3                     | immune checkpoint inhibitory receptor              | T cell co-signaling pathway -negative immune regulation        |
|             | <i>B7-H7</i>                | B7 superfamily molecule                                   | Immunomodulatory ligand                            | T cell co-signaling pathway -negative immune regulation        |
|             | <i>ICOS</i>                 | Inducible T-cell Co-stimulator                            | Immunomodulatory ligand                            | T cell co-signaling pathway - positive immune regulation       |
| <i>IDO1</i> | Indoleamine 2,3-dioxygenase | enzyme degrading tryptophan                               | inflammation and immunosuppression                 |                                                                |

|                     |                |                                              |                                                                                 |                                                         |
|---------------------|----------------|----------------------------------------------|---------------------------------------------------------------------------------|---------------------------------------------------------|
|                     | <i>IFNAR1</i>  | Interferon alpha and beta receptor 1         | cytokine receptor                                                               | inflammation and immunosuppression                      |
|                     | <i>IFNAR2</i>  | Interferon alpha and beta receptor 2         | cytokine receptor                                                               | inflammation and immunosuppression                      |
|                     | <i>IFNGR1</i>  | Interferon gamma receptor 1                  | cytokine receptor                                                               | inflammation and immunosuppression                      |
|                     | <i>IL2RA</i>   | Interleukin-2 receptor                       | cytokine receptor                                                               | positive immune regulation                              |
|                     | <i>NKG2A</i>   | Natural killer G2 A receptor                 | NK cell inhibitory receptor                                                     | innate immune system - negative regulation of NK cells  |
|                     | <i>NKG2D</i>   | Natural killer G2 D receptor                 | NK cell activating receptor                                                     | innate immune system - positive regulation of NK cells  |
|                     | <i>LAG3</i>    | Lymphocyte activating gene 3                 | immune checkpoint inhibitory receptor                                           | negative immune regulation                              |
|                     | <i>CD73</i>    | Cluster of differentiation 73                | ectoenzyme generating adenosine                                                 | immunosuppression - adenosine pathway                   |
|                     | <i>PD1</i>     | Programmed Death-1                           | immune checkpoint inhibitory receptor                                           | T cell co-signaling pathway -negative immune regulation |
|                     | <i>PIK3CG</i>  | Phosphoinositide 3-kinase -gamma             | enzyme involved in cellular function                                            | macrophages differentiation                             |
|                     | <i>TIGIT</i>   | T cell Immunoglobulin and ITIM domain        | immune checkpoint inhibitory receptor                                           | T cell co-signaling pathway -negative immune regulation |
|                     | <i>TLR2</i>    | Toll-Like Receptor 2                         | Toll-like receptor                                                              | Toll-like receptor signaling pathway                    |
|                     | <i>TLR3</i>    | Toll-Like Receptor 3                         | Toll-like receptor                                                              | Toll-like receptor signaling pathway                    |
|                     | <i>TLR7</i>    | Toll-Like Receptor 7                         | Toll-like receptor                                                              | Toll-like receptor signaling pathway                    |
|                     | <i>TLR9</i>    | Toll-Like Receptor 9                         | Toll-like receptor                                                              | Toll-like receptor signaling Pathway                    |
|                     | <i>B7-H4</i>   | B7 superfamily molecule                      | Immunomodulatory ligand                                                         | T cell co-signaling pathway -negative immune regulation |
|                     | <i>KIR3DL1</i> | Killer Immunoglobulin-like receptor          | NK cell inhibitory receptor                                                     | innate immune system- negative regulation of Nk cells   |
|                     | <i>GARP</i>    | Glycoprotein A repetitions predominant       | transmembrane protein                                                           | Treg marker                                             |
| DNA mismatch repair | <i>MLH1</i>    | MutL Homolog 1                               | DNA mismatch repair                                                             |                                                         |
|                     | <i>MLH3</i>    | MutL Homolog 3                               | DNA mismatch repair                                                             |                                                         |
|                     | <i>MSH2</i>    | MutS Homolog 2                               | DNA mismatch repair                                                             |                                                         |
|                     | <i>MSH3</i>    | MutS Homolog 3                               | DNA mismatch repair                                                             |                                                         |
|                     | <i>MSH6</i>    | MutS Homolog 6                               | DNA mismatch repair                                                             |                                                         |
|                     | <i>PMS1</i>    | PMS1 Homolog 1                               | DNA mismatch repair                                                             |                                                         |
|                     | <i>PMS2</i>    | PMS1 Homolog 2                               | DNA mismatch repair                                                             |                                                         |
|                     | <i>POLH</i>    | DNA Polymerase Eta                           | DNA polymerase specifically involved in the DNA repair by translesion synthesis |                                                         |
| Targetable antigens | <i>GPVMB</i>   | Transmembrane glycoprotein NMB               | promotion of cell migration, invasion, and metastasis                           |                                                         |
|                     | <i>NECTIN4</i> | Nectin Cell Adhesion Molecule 4              | Cell adhesion                                                                   |                                                         |
|                     | <i>Trop-2</i>  | Tumor-associated calcium signal transducer 2 | Cell surface receptor that transduces calcium signals                           |                                                         |
|                     | <i>5T4</i>     | Trophoblast Glycoprotein                     | Cell adhesion and antagonist of Wnt/ $\beta$ -catenin signalling pathway        |                                                         |

|                                 |               |                                                                        |                                                                                                                                    |  |
|---------------------------------|---------------|------------------------------------------------------------------------|------------------------------------------------------------------------------------------------------------------------------------|--|
|                                 | <i>LIV-1</i>  | Solute Carrier Family 39 Member 6                                      | Control of gene transcription, growth, development, and differentiation                                                            |  |
|                                 | <i>PSMA</i>   | Zinc metalloenzyme                                                     |                                                                                                                                    |  |
| Signaling pathway - EGF         | <i>EGFR</i>   | Epidermal Growth Factor Receptor                                       | Epidermal growth factor signalling pathway including cellular growth                                                               |  |
|                                 | <i>ERBB2</i>  | Erb-B2 Receptor Tyrosine Kinase 2                                      | Epidermal growth factor signalling pathway including cellular growth                                                               |  |
|                                 | <i>ERBB3</i>  | Erb-B2 Receptor Tyrosine Kinase 3                                      | Epidermal growth factor signalling pathway including cellular growth                                                               |  |
| Signaling pathway - AKT/PI3K    | <i>AKT1</i>   | AKT Serine/Threonine Kinase 1                                          | AKT/PI3K related signalling pathways: cell proliferation, survival, metabolism, and angiogenesis                                   |  |
|                                 | <i>mTOR</i>   | Mechanistic Target Of Rapamycin Kinase                                 | AKT/PI3K pathway: cellular responses to stresses (DNA damage) and promotion of cell survival and cell cycle progression            |  |
|                                 | <i>PIK3CA</i> | Phosphatidylinositol-4,5-Bisphosphate 3-Kinase Catalytic Subunit Alpha | AKT/PI3K related signalling pathways: cell proliferation, survival, metabolism, and angiogenesis                                   |  |
| Signaling pathway - PDGF/VEGF   | <i>PDGFRA</i> | Platelet derived growth factor receptor alpha                          | PDGF/VEGF signaling pathways including cellular growth and differentiation                                                         |  |
|                                 | <i>PDGFRB</i> | Platelet derived growth factor receptor beta                           | PDGF/VEGF signaling pathways including cellular growth and differentiation                                                         |  |
|                                 | <i>PDGFC</i>  | Platelet-derived growth factor C                                       | PDGF/VEGF signaling pathways including cellular growth and differentiation                                                         |  |
| Signaling pathway - MAPK        | <i>NTRK1</i>  | Neurotrophic Receptor Tyrosine Kinase 1                                | MAPK pathway including cell differentiation                                                                                        |  |
|                                 | <i>NTRK2</i>  | Neurotrophic Receptor Tyrosine Kinase 2                                | MAPK pathway including cell differentiation                                                                                        |  |
|                                 | <i>NTRK3</i>  | Neurotrophic Receptor Tyrosine Kinase 3                                | MAPK pathway including cell differentiation                                                                                        |  |
| Signaling pathway - Coagulation | <i>TF</i>     | Coagulation Factor III (Tissue factor)                                 | Coagulation pathway: normal hemostasis by initiating the cell-surface assembly and propagation of the coagulation protease cascade |  |
| Methylation                     | <i>DNMT1</i>  | DNA methyltransferase 1                                                | DNA methylation                                                                                                                    |  |
|                                 | <i>TRDMT1</i> | TRNA Aspartic Acid Methyltransferase 1                                 | DNA (cytosine-5-)-methyltransferase activity                                                                                       |  |
|                                 | <i>DNMT3A</i> | DNA Methyltransferase 3 Alpha                                          | DNA de novo methylation                                                                                                            |  |
|                                 | <i>DNMT3B</i> | DNA Methyltransferase 3 Beta                                           | DNA de novo methylation                                                                                                            |  |
|                                 | <i>HDAC1</i>  | Histone Deacetylase 1                                                  | Catalyzation of acetyl group removal from lysine residues in histones and non-histone proteins, causing transcriptional repression |  |



|              |               |                                                 |                                                                                                                      |  |
|--------------|---------------|-------------------------------------------------|----------------------------------------------------------------------------------------------------------------------|--|
| Angiogenesis | <i>VEGFA</i>  | Vascular endothelial growth factor A            | PDGF/VEGF signaling pathways including angiogenesis                                                                  |  |
|              | <i>VEGFB</i>  | Vascular Endothelial Growth Factor B            | PDGF/VEGF signaling pathways including angiogenesis                                                                  |  |
|              | <i>KDR</i>    | Kinase Insert Domain Receptor (VEGFR2)          | VEGF family receptor for angiogenesis                                                                                |  |
|              | <i>FLT1</i>   | Fms Related Receptor Tyrosine Kinase 1 (VEGFR1) | VEGF family receptor for angiogenesis                                                                                |  |
|              | <i>FLT4</i>   | Fms Related Receptor Tyrosine Kinase 4 (VEGFR3) | VEGF family receptor for angiogenesis                                                                                |  |
| Cycling      | <i>CCND1</i>  | Cyclin D1                                       | Cell cycle progression by forming a complex with CDK4 or CDK6 (G1/S transition)                                      |  |
|              | <i>CCNE1</i>  | Cyclin E1                                       | Cell cycle progression by forming a complex with CDK2 (G1/S transition)                                              |  |
|              | <i>CDK2</i>   | Cyclin Dependent Kinase 2                       | Cell cycle progression by forming a complex with cyclin A or E, CDK inhibitor p21Cip1 (CDKN1A), and p27Kip1 (CDKN1B) |  |
|              | <i>CDK4</i>   | Cyclin Dependent Kinase 4                       | Cell cycle progression (G1 phase) and phosphorylation of retinoblastoma gene product (Rb)                            |  |
|              | <i>CDK6</i>   | Cyclin Dependent Kinase 6                       | Cell cycle progression (G1 phase) and phosphorylation of retinoblastoma gene product (Rb)                            |  |
|              | <i>CDKN2A</i> | Cyclin Dependent Kinase Inhibitor 2A            | Cell cycle inhibition as inhibitors of CDK4 kinase and degradation of p53                                            |  |
|              | <i>CDKN2C</i> | Cyclin Dependent Kinase Inhibitor 2C            | Cell cycle inhibition as inhibitors of CDK4 and CDK6 kinases                                                         |  |
|              | <i>MYC</i>    | MYC Proto-Oncogene                              | Cell cycle progression by acting as transcription factor and angiogenesis                                            |  |
|              | <i>RB1</i>    | RB Transcriptional Corepressor 1                | Cell cycle inhibition by binding to E2F (inactive)                                                                   |  |
|              | <i>TTK</i>    | Dual Specificity Protein Kinase TTK             | Cell cycle progression as mitotic checkpoint protein for accurate segregation of chromosomes during mitosis          |  |
|              | <i>PLK4</i>   | Polo Like Kinase 4                              | Cell cycle progression by regulating centriole duplication                                                           |  |
| Hormonal     | <i>AR</i>     | Androgen Receptor                               | Androgen-induced cell proliferation                                                                                  |  |
|              | <i>ESR1</i>   | Estrogen Receptor 1                             | Estrogen-induced cell proliferation                                                                                  |  |
|              | <i>PGR</i>    | Progesterone Receptor                           | Progesterone-induced cell proliferation                                                                              |  |
| HRD          | <i>ATM</i>    | Ataxia Telangiectasia Mutated                   | Activation of checkpoint signaling upon double strand breaks                                                         |  |
|              | <i>ATR</i>    | Ataxia Telangiectasia And Rad3 Related          | Activation of checkpoint signaling upon double strand breaks                                                         |  |

|                 |                                          |                                                                                                                         |  |
|-----------------|------------------------------------------|-------------------------------------------------------------------------------------------------------------------------|--|
| <i>BARD1</i>    | BRCA1 Associated RING Domain 1           | Interaction with the N-terminal region of BRCA1                                                                         |  |
| <i>BRCA1</i>    | BRCA1 DNA Repair Associated              | Homologous recombination pathway for double-strand DNA repair                                                           |  |
| <i>BRCA2</i>    | BRCA2 DNA Repair Associated              | Homologous recombination pathway for double-strand DNA repair                                                           |  |
| <i>BRIP1</i>    | BRCA1 Interacting Helicase 1             | Interaction with the BRCT repeats of BRCA1                                                                              |  |
| <i>CDK12</i>    | Cyclin Dependent Kinase 12               | Regulator of transcription elongation by phosphorylating RNA polymerase II and genes involving in DNA repair            |  |
| <i>CHEK2</i>    | Checkpoint Kinase 2                      | Stabilization of p53 leading to cell cycle arrest in G1 and interaction with BRCA1 to restore survival after DNA damage |  |
| <i>EMSY</i>     | EMSY Transcriptional Repressor           | Interaction with BRCA2                                                                                                  |  |
| <i>ABRAXAS1</i> | Abraxas 1                                | Interaction with C-terminal repeats of BRCA1                                                                            |  |
| <i>FANCA</i>    | FA Complementation Group A               | DNA postreplication repair, cell cycle checkpoint function                                                              |  |
| <i>FANCM</i>    | FA Complementation Group M               | Fanconi anemia complementation group                                                                                    |  |
| <i>NBN</i>      | Nibrin                                   | Member of the MRE11/RAD50 double-strand break repair complex                                                            |  |
| <i>PALB2</i>    | Partner And Localizer Of BRCA2           | Interaction with BRCA2                                                                                                  |  |
| <i>PTEN</i>     | Phosphatase And Tensin Homolog           | Tumor suppression by negatively regulating AKT/PKB signaling pathway                                                    |  |
| <i>RAD50</i>    | RAD50 Double Strand Break Repair Protein | Component of the MRN complex for double-strand break (DSB) repair, DNA recombination, maintenance of telomere           |  |
| <i>RAD51C</i>   | RAD51 Paralog C                          | Member of the RAD51 family involved in Holliday junction resolution                                                     |  |
| <i>RAD51D</i>   | RAD51 Paralog D                          | Member of the RAD51 family                                                                                              |  |
| <i>TP53</i>     | Tumor Protein P53                        | Cell cycle inhibition, apoptosis, senescence, DNA repair, or changes in metabolism                                      |  |

**Supplementary Table 6: List of cell types scored by xCell deconvolution tool**

| Class              | Cell types                    | Full name                         |
|--------------------|-------------------------------|-----------------------------------|
| Lymphocytes B      | B-cells                       | /                                 |
|                    | Class-switched memory B-cells | /                                 |
|                    | Memory B-cells                | /                                 |
|                    | naive B-cells                 | /                                 |
|                    | pro B-cells                   | /                                 |
|                    | Plasma cells                  | /                                 |
| Lymphocytes T CD4+ | CD4+ T-cells                  | /                                 |
|                    | CD4+ memory T-cells           | /                                 |
|                    | CD4+ naive T-cells            | /                                 |
|                    | CD4+ Tcm                      | CD4+ central memory T cells       |
|                    | CD4+ Tem                      | CD4+ effector memory T cells      |
|                    | Th1 cells                     | Lymphocytes T helper 1            |
|                    | Th2 cells                     | Lymphocytes T helper 2            |
|                    | Tregs                         | Regulatory T cells                |
| Lymphocytes T CD8+ | CD8+ T-cells                  | /                                 |
|                    | CD8+ naive T-cells            | /                                 |
|                    | CD8+ Tcm                      | CD8+ central memory T cells       |
|                    | CD8+ Tem                      | CD8+ effector memory T cells      |
| Other lymphocytes  | NK cells                      | Natural killer cells              |
|                    | NKT                           | Natural killer T cells            |
|                    | Tgd cells                     | Lymphocytes T gamma delta         |
| Myeloid cells      | DC                            | Dendritic cells                   |
|                    | aDC                           | Activated dendritic cells         |
|                    | cDC                           | Conventional dendritic cells      |
|                    | iDC                           | Immature dendritic cells          |
|                    | pDC                           | Plasmacytoid dendritic cells      |
|                    | Eosinophils                   | /                                 |
|                    | Basophils                     | /                                 |
|                    | Neutrophils                   | /                                 |
|                    | Macrophages                   | /                                 |
|                    | Mast cells                    | /                                 |
|                    | Monocytes                     | /                                 |
|                    | Stromal cells                 | Endothelial cells                 |
| Fibroblasts        |                               | /                                 |
| Myocytes           |                               | /                                 |
| Smooth muscle      |                               | /                                 |
| Pericytes          |                               | /                                 |
| Stem cells         | CLP                           | Common Lymphoid Progenitor        |
|                    | CMP                           | Common Myeloid Progenitor         |
|                    | GMP                           | Granulocyte-macrophage progenitor |
|                    | MSC                           | Mesenchymal stem cell             |
|                    | MPP                           | Multipotent progenitor            |
| Other cells        | Adipocytes                    | /                                 |
|                    | Preadipocytes                 | /                                 |
|                    | Epithelial cells              | /                                 |
|                    | Neurons                       | /                                 |

**Supplementary Table 7: Selection of different molecular features based on the stroma (S) and tumor (T) compartments specificity**  
(referred to **Figure 4c, Supplementary Figures 3a and 3b**)

| Signatures                |                                   |                             | Cell type enrichment scores by xCell |                               |                             | Single genes of interest |                |                             |   |
|---------------------------|-----------------------------------|-----------------------------|--------------------------------------|-------------------------------|-----------------------------|--------------------------|----------------|-----------------------------|---|
| Class                     | Signatures                        | Compartment specificity [1] | Class                                | Cell types                    | Compartment specificity [1] | Class                    | Genes          | Compartment specificity [1] |   |
| <b>Cellular component</b> | Peroxisome                        | T                           | <b>Lympho B</b>                      | B-cells                       | S                           | <b>Immune</b>            | <i>ADA</i>     | S                           |   |
|                           | Apical junction                   | S                           |                                      | Class-switched memory B-cells | S                           |                          | <i>ADORA2A</i> | S                           |   |
|                           | Apical surface                    | S                           |                                      | Memory B-cells                | S                           |                          | <i>VISTA</i>   | S                           |   |
| <b>Development</b>        | Myogenesis                        | S                           |                                      | naive B-cells                 | S                           |                          | <i>CCL5</i>    | S                           |   |
|                           | Epithelial mesenchymal transition | T                           |                                      | pro B-cells                   | S                           |                          | <i>CCR4</i>    | S                           |   |
|                           | Angiogenesis                      | S                           |                                      | Plasma cells                  | S                           |                          | <i>CCR8</i>    | S                           |   |
|                           | Adipogenesis                      | S                           |                                      | CD4+ T-cells                  | S                           |                          | <i>CD134</i>   | S                           |   |
| <b>Stroma</b>             | Stroma1                           | S                           |                                      | <b>Lympho T CD4+</b>          | CD4+ memory T-cells         |                          | S              | <i>CD137</i>                | S |
|                           | Stroma2                           | S                           |                                      |                               | CD4+ naive T-cells          |                          | S              | <i>CD27</i>                 | S |
|                           | ecm-myCAF                         | S                           |                                      |                               | CD4+ Tcm                    |                          | S              | <i>PD-L1</i>                | S |
|                           | TGFbeta-myCAF                     | S                           | CD4+ Tem                             |                               | S                           | <i>B7-H3</i>             | S              |                             |   |
|                           | wound-myCAF                       | S                           | Th1 cells                            |                               | S                           | <i>CD40</i>              | S              |                             |   |
|                           | detox-iCAF                        | S                           | Th2 cells                            | S                             | <i>CD40L</i>                | S                        |                |                             |   |
|                           | IL-iCAF                           | S                           | Tregs                                | S                             | <i>CD47</i>                 | S                        |                |                             |   |
|                           | IFNgamma-iCAF                     | S                           | <b>Lympho T CD8+</b>                 | CD8+ T-cells                  | S                           | <i>CD96</i>              | S              |                             |   |
|                           | Normal fibroblast                 | S                           |                                      | CD8+ naive T-cells            | S                           | <i>CSF1R</i>             | S              |                             |   |
|                           | CAF                               | S                           |                                      | CD8+ Tcm                      | S                           | <i>CTLA4</i>             | S              |                             |   |
| <b>Immune</b>             | Interferon gamma response         | S                           |                                      | <b>Other lympho</b>           | CD8+ Tem                    | S                        | <i>CXCL12</i>  | S                           |   |
|                           | Interferon alpha response         | S                           |                                      |                               | NK cells                    | S                        | <i>CXCR4</i>   | S                           |   |
|                           | Inflammatory response             | S                           | NKT                                  |                               | S                           | <i>DCIR</i>              | S              |                             |   |
|                           | IL6 JAK STAT3 signaling           | S                           | <b>Myeloid cells</b>                 | Tgd cells                     | S                           | <i>CD39</i>              | S              |                             |   |
|                           | IL2 STAT5 signaling               | S                           |                                      | DC                            | S                           | <i>FOXP3</i>             | S              |                             |   |
|                           | Complement                        | S                           |                                      | aDC                           | S                           | <i>GITR</i>              | S              |                             |   |
|                           | Coagulation                       | S                           |                                      | cDC                           | S                           | <i>TIM3</i>              | S              |                             |   |
|                           | TNFA signaling via NF-kB          | S                           |                                      | iDC                           | S                           | <i>B7-H7</i>             | S              |                             |   |
|                           | Immune1                           | S                           |                                      | pDC                           | S                           | <i>ICOS</i>              | S              |                             |   |
|                           | Immune2                           | S                           |                                      | Eosinophils                   | S                           | <i>IDO1</i>              | S              |                             |   |
|                           | TAM                               | S                           |                                      | Basophils                     | S                           | <i>IFNAR1</i>            | S              |                             |   |
|                           | Trm                               | S                           |                                      | Neutrophils                   | S                           | <i>IFNAR2</i>            | S              |                             |   |
|                           | TLS Cabrita                       | S                           |                                      | Macrophages                   | S                           | <i>IFNGR1</i>            | S              |                             |   |
|                           | TLS Meylan                        | S                           |                                      | Mast cells                    | S                           | <i>IL2RA</i>             | S              |                             |   |
|                           | TLS Lundeberg                     | S                           |                                      | Monocytes                     | S                           | <i>NKG2A</i>             | S              |                             |   |

|                      |                                 |               |                                        |                   |   |                                     |                |         |
|----------------------|---------------------------------|---------------|----------------------------------------|-------------------|---|-------------------------------------|----------------|---------|
|                      | TLS ST                          | S             |                                        | Endothelial cells | S |                                     | <i>NKG2D</i>   | S       |
| <b>Metabolic</b>     | Xenobiotic metabolism           | T             | <b>Stromal cells</b>                   | Fibroblasts       | S |                                     | <i>LAG3</i>    | S       |
|                      | Oxidative phosphorylation       | T             |                                        | Myocytes          | S |                                     | <i>CD73</i>    | S       |
|                      | Glycolysis                      | T             |                                        | Smooth muscle     | S |                                     | <i>PD1</i>     | S       |
|                      | Fatty acid metabolism           | T             |                                        | Pericytes         | S |                                     | <i>PIK3CG</i>  | S       |
|                      | Bile acid metabolism            | T             |                                        |                   |   | S                                   | <i>TIGIT</i>   | S       |
|                      | Heme metabolism                 | T             | <b>Stem cells</b>                      | CLP               | S |                                     | <i>TLR2</i>    | S       |
|                      | Cholesterol homeostasis         | T             |                                        | CMP               | S |                                     | <i>TLR3</i>    | S       |
|                      |                                 |               |                                        | GMP               | S |                                     | <i>TLR7</i>    | S       |
| <b>Pathway</b>       | Protein secretion               | T             |                                        | MSC               | S |                                     | <i>TLR9</i>    | S       |
|                      | Hypoxia                         | S             |                                        | MPP               | S |                                     | <i>B7-H4</i>   | S       |
|                      | Apoptosis                       | S             | <b>Other cells</b>                     | Adipocytes        | S |                                     | <i>KIR3DL1</i> | S       |
|                      | Unfolded protein response       | T             |                                        | Preadipocytes     | S |                                     | <i>GARP</i>    | S       |
|                      | Reactive oxygen species pathway | T             |                                        | Epithelial cells  | T |                                     | <i>MLH1</i>    | T       |
|                      | p53 pathway                     | T             |                                        | Neurons           | S |                                     | <i>MLH3</i>    | T       |
| <b>Proliferation</b> | MYC targets v2                  | T             |                                        |                   |   | <b>DNA mismatch repair</b>          | <i>MSH2</i>    | T       |
|                      | MYC targets v1                  | T             |                                        |                   |   |                                     | <i>MSH3</i>    | T       |
|                      | Mitotic spindle                 | T             |                                        |                   |   |                                     | <i>MSH6</i>    | T       |
|                      | E2F targets                     | T             |                                        |                   |   |                                     | <i>PMS1</i>    | T       |
|                      | G2M checkpoint                  | T             |                                        |                   |   |                                     | <i>PMS2</i>    | T       |
|                      | GGI                             | T             |                                        |                   |   |                                     | <i>POLH</i>    | T       |
|                      | CIN70                           | T             |                                        |                   |   |                                     | <i>GPNUMB</i>  | T       |
|                      | GENE70                          | T             |                                        |                   |   |                                     | <i>NECTIN4</i> | T       |
| <b>Signaling</b>     | WNT beta catenin signaling      | T and S       |                                        |                   |   | <b>Targetable antigens</b>          | <i>Trop-2</i>  | T       |
|                      | TGF beta signaling              | T and S       |                                        |                   |   |                                     | <i>5T4</i>     | T       |
|                      | PI3K AKT mTOR signaling         | T             |                                        |                   |   |                                     | <i>LIV-1</i>   | T       |
|                      | KRAS signaling                  | T             |                                        |                   |   |                                     | <i>PSMA</i>    | T       |
|                      | Hedgehog signaling              | T and S       |                                        |                   |   |                                     |                |         |
|                      | Estrogen response late          | T             |                                        |                   |   | <b>Signaling pathway - EGF</b>      | <i>EGFR</i>    | T       |
|                      | Estrogen response early         | T             |                                        |                   |   |                                     | <i>ERBB2</i>   | T       |
|                      | Androgen response               | T             |                                        |                   |   |                                     | <i>ERBB3</i>   | T       |
|                      | mTORC1 signaling                | T             |                                        |                   |   | <b>Signaling pathway - AKT/PI3K</b> | <i>AKT1</i>    | T       |
|                      | NOTCH signaling                 | T and S       |                                        |                   |   |                                     | <i>mTOR</i>    | T       |
| AR gene              | T                               | <i>PIK3CA</i> | T                                      |                   |   |                                     |                |         |
| <b>DNA damage</b>    | ESR1 gene                       | T             |                                        |                   |   | <b>Signaling pathway - PDGF</b>     | <i>PDGFR A</i> | T and S |
|                      | Parp17                          | T             |                                        |                   |   |                                     | <i>PDGFR B</i> | T and S |
|                      | VCpred_TN                       | T             |                                        |                   |   | <i>PDGFC</i>                        | T and S        |         |
|                      | DNA repair                      | T             |                                        |                   |   | <i>NTRK1</i>                        | T              |         |
|                      |                                 |               |                                        |                   |   | <i>NTRK2</i>                        | T              |         |
|                      |                                 | <i>NTRK3</i>  | T                                      |                   |   |                                     |                |         |
|                      |                                 |               | <b>Signaling pathway - Coagulation</b> |                   |   | <i>TF</i>                           | T              |         |

|                     |                 |   |
|---------------------|-----------------|---|
| <b>Methylation</b>  | <i>DNMT1</i>    | T |
|                     | <i>TRDMT1</i>   | T |
|                     | <i>DNMT3A</i>   | T |
|                     | <i>DNMT3B</i>   | T |
|                     | <i>HDAC1</i>    | T |
| <b>Angiogenesis</b> | <i>VEGFA</i>    | S |
|                     | <i>VEGFB</i>    | S |
|                     | <i>KDR</i>      | S |
|                     | <i>FLT1</i>     | S |
|                     | <i>FLT4</i>     | S |
| <b>Cycling</b>      | <i>CCND1</i>    | T |
|                     | <i>CCNE1</i>    | T |
|                     | <i>CDK2</i>     | T |
|                     | <i>CDK4</i>     | T |
|                     | <i>CDK6</i>     | T |
|                     | <i>CDKN2A</i>   | T |
|                     | <i>CDKN2C</i>   | T |
|                     | <i>MYC</i>      | T |
|                     | <i>RB1</i>      | T |
|                     | <i>TTK</i>      | T |
|                     | <i>PLK4</i>     | T |
| <b>Hormonal</b>     | <i>AR</i>       | T |
|                     | <i>ESR1</i>     | T |
|                     | <i>PGR</i>      | T |
| <b>HRD</b>          | <i>ATM</i>      | T |
|                     | <i>ATR</i>      | T |
|                     | <i>BARD1</i>    | T |
|                     | <i>BRCA1</i>    | T |
|                     | <i>BRCA2</i>    | T |
|                     | <i>BRIP1</i>    | T |
|                     | <i>CDK12</i>    | T |
|                     | <i>CHEK2</i>    | T |
|                     | <i>EMSY</i>     | T |
|                     | <i>ABRAXAS1</i> | T |
|                     | <i>FANCA</i>    | T |
|                     | <i>FANCM</i>    | T |
|                     | <i>NBN</i>      | T |
|                     | <i>PALB2</i>    | T |
|                     | <i>PTEN</i>     | T |
|                     | <i>RAD50</i>    | T |
|                     | <i>RAD51C</i>   | T |
| <i>RAD51D</i>       | T               |   |
| <i>TP53</i>         | T               |   |

[1] T = tumor compartment; S = stroma compartment as defined by the regressor (see METHODS: Stroma compartment was defined as the sum of all categories, except tumor, in situ and necrosis categories).

**Supplementary Table 8: Morphological and molecular characterizations of different molecular subtypes defined on the tumor compartment (or tumor pseudobulk, PB)**  
 (Referred to **Figure 4c**, tumor compartment; **Supplementary Figure 3a**)

| Tumor compartment/<br>pseudobulk | Annotations [1] [2]                                       |                                | Signature [1]                                                                                                                                                                                                                                                                                                        |                                                                                                                                                                                                       | Single genes [1]                                                                         |                                                                                                                          | Summary                             |
|----------------------------------|-----------------------------------------------------------|--------------------------------|----------------------------------------------------------------------------------------------------------------------------------------------------------------------------------------------------------------------------------------------------------------------------------------------------------------------|-------------------------------------------------------------------------------------------------------------------------------------------------------------------------------------------------------|------------------------------------------------------------------------------------------|--------------------------------------------------------------------------------------------------------------------------|-------------------------------------|
|                                  | ↑                                                         | ↓                              | ↑                                                                                                                                                                                                                                                                                                                    | ↓                                                                                                                                                                                                     | ↑                                                                                        | ↓                                                                                                                        |                                     |
| <b>LAR</b>                       | Lactiferous duct, in situ, Total stroma, acellular stroma | Tumor                          | mTORC1 sig, AR gene, androgen response, estrogen response early/late, PI3K/AKT/mTOR signaling, protein secretion, unfolded protein response, reactive oxygen species path, p53 pathway, Heme/Bile acid/fatty acid/xenobiotic metabolisms, oxydative phosphorylation, cholesterol homeostasis, glycolysis, peroxisome | MYC targets v2, mitotic spindle, E2F target, GENE70, GGI, CIN70, G2M checkpoint, hedgehog signaling, Parp17                                                                                           | AR, AKT1                                                                                 | POLH, PSMA, PIK3CA, NTRK2/3, TF, HDAC1, DNMT3A, TRDMT1, DNMT1, CCNE1, CDKN2A/C, MYC, PLK4, BRCA2, CHEK2, FANCA, RAD51D/C | Metabolism<br>PI3K/AKT/<br>mTOR sig |
| <b>M</b>                         | /                                                         | Lymphocytes                    | EMT, WNT beta catenin signaling, Parp17                                                                                                                                                                                                                                                                              | PI3K/AKT/mTOR sig, mTORC1 sig, DNA repair, ESR1/AR gene<br>MYC targets v2, unfolded protein response, reactive oxygen species path, fatty acid/heme metabolism, oxydative phosphorylation, peroxisome | PDGFRA, NTRK2                                                                            | ERBB3, AR, ESR1, RAD50                                                                                                   | EMT<br><i>PDGFRA</i> gene           |
| <b>BL</b>                        | Tumor, lymphocytes                                        | Acellular stroma, total stroma | G2M, CIN70, GGI, E2F, Mitotic spindle, MYC targets v1/2, DNA repair                                                                                                                                                                                                                                                  | EMT, TGF beta signaling, estrogen response late, ESR1 gene                                                                                                                                            | DNMT1, HDAC1, CCNE1, CDKN2A, MYC, TTK, PLK4, BARD1, BRCA1/2, CHEK2, FANCA, PALB2, RAD51D | ERBB2, ESR1                                                                                                              | Proliferation<br>DNA repair         |

[1] Only significant clinical and molecular features with FDRs <0.05 were reported

[2] Annotations -> morphological annotations represented the annotations for the whole section including stroma and tumor compartments

**Supplementary Table 9: List of selected molecular features relevant to characterize TNBC molecular subtypes in the tumor compartment (referred to Figure 4c – tumor compartment)**

| Main function   | Type of molecular feature | List of selected molecular features                                                                                                                           |
|-----------------|---------------------------|---------------------------------------------------------------------------------------------------------------------------------------------------------------|
| Pathway         | Signatures                | Epithelial mesenchymal transition<br>PI3K AKT mTOR signaling<br>WNT beta catenin signaling<br>Estrogen response late<br>Androgen response<br>mTORC1 signaling |
|                 | Single genes              | <i>ESR1</i><br><i>AR</i><br><i>NTRK2</i><br><i>PDGFRA</i><br><i>AKT1</i><br><i>DNMT1</i>                                                                      |
| Metabolism      | Signatures                | Glycolysis<br>Fatty acid metabolism<br>Oxidative phosphorylation                                                                                              |
| Proliferation   | Signatures                | MYC targets v2<br>GGI<br>G2M checkpoint<br>Mitotic spindle                                                                                                    |
|                 | Single genes              | <i>MYC</i><br><i>CCNE1</i><br><i>CDKN2A</i><br><i>PLK4</i>                                                                                                    |
| Stress response | Signatures                | DNA repair                                                                                                                                                    |
|                 | Single genes              | <i>BRCA1</i><br><i>BRCA2</i><br><i>CHEK2</i><br><i>PALB2</i>                                                                                                  |



**Supplementary Table 10: Morphological and molecular characterizations of different molecular subtypes defined on the stroma compartment (or stroma pseudobulk, PB)**  
(Referred to **Figure 4c**, stroma compartment; **Supplementary Figure 3b**)

| Stroma compartment/<br>pseudo-bulk | Annotations [1] [2]                                         |                                                                                      | Signature [1]                                                                                                                                                                                                       |                                                                                                                                                                                                   | Cell type enrichment scores [1]                                                                          |                                                                                                                 | Single genes [1]                                                                                                                                                                         |                                                                                                                                                           | Summary                          |
|------------------------------------|-------------------------------------------------------------|--------------------------------------------------------------------------------------|---------------------------------------------------------------------------------------------------------------------------------------------------------------------------------------------------------------------|---------------------------------------------------------------------------------------------------------------------------------------------------------------------------------------------------|----------------------------------------------------------------------------------------------------------|-----------------------------------------------------------------------------------------------------------------|------------------------------------------------------------------------------------------------------------------------------------------------------------------------------------------|-----------------------------------------------------------------------------------------------------------------------------------------------------------|----------------------------------|
|                                    | ↑                                                           | ↓                                                                                    | ↑                                                                                                                                                                                                                   | ↓                                                                                                                                                                                                 | ↑                                                                                                        | ↓                                                                                                               | ↑                                                                                                                                                                                        | ↓                                                                                                                                                         |                                  |
| <b>LAR</b>                         | Total stroma, acellular stroma, in situ                     | /                                                                                    | Adipogenesis                                                                                                                                                                                                        | WNT beta catenin sig, immune 1/2, TLS Lundeborg, complement, IL6 sig, inflammatory response, IFNa/g response, Trm, TAM, IFNg-iCAF                                                                 | /                                                                                                        | CD4 naive, Th1, CD8 naive, all DCs, pericytes                                                                   | /                                                                                                                                                                                        | Immune genes: ADA, VISTA, CD134, CD137, PD-L1, CD40, CSF1R, CTLA4, DCIR, FOXP3, TIM3, GTR, ICOS, IDO1, IFNAR2, IL2RA, LAG3, CD73, TLR2                    | Adipogenesis<br>Immune-depletion |
| <b>MSL</b>                         | Vessels, lactiferous duct, fat tissue, total stroma, stroma | Tumor                                                                                | Stroma1/2, CAF, ecm-myCAF, TGFb-myCAF, wound-myCAF, IL-iCAF, detox-iCAF, normal fibroblast, TGFbeta sig, WNT beta catenin sig, Hedgehog, apoptosis, hypoxia, coagulation, angiogenesis, myogenesis, apical junction | /                                                                                                                                                                                                 | Endothelial cells, fibroblasts, adipocytes, neurons                                                      | Th1/Th2, Treg, CD8 Tcm/Tem, macrophages                                                                         | B7-H3, CXCL12, CD73, PDGFRA/B, PDGFC, VEGFA/B, KDR, FLT1/4                                                                                                                               | LAG3, CD137                                                                                                                                               | Angiogenesis<br>CAF              |
| <b>M</b>                           | /                                                           | Lymphoid nodule (TLS), lactiferous duct, fat tissue, lymphocytes<br>CD20, CD3, sTILs | /                                                                                                                                                                                                                   | CAF, detox-iCAF, IL-CAF, IFNg-iCAF, normal fibroblast, apoptosis, TNF alpha sig, Immune 1/2, TLS lundeborg/ST, complement, IL2/6 sig, inflammatory response, IFNa/g res, Trm, TAM                 | Neutrophils, smooth muscle, GMP, neurons                                                                 | All B cells (except naive B cells), CD4 naive/Tem, CD8 naive/Tcm/wsqTem, DC/aDC/cDC/pDC, basophils, macrophages | CD73, VEGFA                                                                                                                                                                              | ADA, VISTA, CCL5, CD134, CD137, CD27, PD-L1, CD40, CD40L, CD47, CD96, CSF1R, CTLA4, DCIR, CD39, FOXP3, TIM3, ICOS, IDO1, LAG3, PD1, TIGIT, TLR3/7, IFNGR1 | Immune-depletion<br>Neutrophils  |
| <b>IM</b>                          | Lymphocytes, tumor Medullary, CD3/CD20/sTILs, Ki67          | In situ, total stroma, acellular stroma, vessels                                     | Immune 1/2, TLS lundeborg/ST, complement, IL2/6 sig, inflammatory response, IFNa/g res, Trm, TAM, IFNg-iCAF                                                                                                         | Stroma1/2, CAF, ecm-myCAF, TGFb-myCAF, wound-myCAF, detox-iCAF, normal fibroblast, TGFbeta sig, WNT beta catenin sig, Hedgehog sig, NOTCH sig, hypoxia, angiogenesis, myogenesis, apical junction | All B cells, plasma cells, Th1/2, CD4 naive/Tem, CD8 naive/Tcm/Tem, all DCs, macrophages, MPP, basophils | Endothelial cells, fibroblast, myocytes, smooth muscle, CMP, adipocytes, neurons                                | Immune genes: ADA, VISTA, CCL5, CD134, CD137, CD27, PD-L1, CD40, CD40L, CD47, CD96, CSF1R, CTLA4, CXCR4, DCIR, FOXP3, CD39, GTR, TIM3, ICOS, IDO1, IFNAR2, IL2RA, LAG3, PD1, TIGIT, TLR7 | CXCL12, B7-H3, CD73, B7-H4<br>PDGFRA/B, PDGFC, VEGFA/B, KDR, FLT1/4                                                                                       | Immune-activation                |

[1] Only significant clinical and molecular features with FDRs <0.05 were reported

[2] Annotations -> morphological annotations represented the annotations for the whole section including stroma and tumor compartments

**Supplementary Table 11: List of selected molecular features relevant to characterize TNBC molecular subtypes in the stroma compartment**  
(referred to **Figure 4c** – stroma compartment)

| Main function   | Type of molecular feature | List of selected molecular features                                                                                                                    |
|-----------------|---------------------------|--------------------------------------------------------------------------------------------------------------------------------------------------------|
| Immune          | Signatures                | TLS Lundeberg<br>Interferon gamma response<br>Interferon alpha response                                                                                |
|                 | Single genes              | <i>CD73</i><br><i>PD-L1</i><br><i>PD1</i><br><i>CTLA4</i><br><i>LAG3</i><br><i>B7-H3</i><br><i>IDO1</i><br><i>ICOS</i><br><i>CXCL12</i><br><i>CCL5</i> |
|                 | Cell types                | Neutrophils [1]<br>Tregs [1]<br>CD8+ T-cells [1]<br>CD4+ naive T-cells [1]<br>Plasma cells [1]<br>Memory B-cells [1]<br>Trm [2]<br>TAM [2]             |
| Stroma          | Signatures                | Angiogenesis<br>Adipogenesis                                                                                                                           |
|                 | Single genes              | <i>VEGFA</i><br><i>VEGFB</i>                                                                                                                           |
|                 | Cell types                | CAF [2]<br>IFNgamma-iCAF [2]<br>Smooth muscle [1]<br>Neurons [1]                                                                                       |
| Pathway         | Signatures                | TGF beta signaling<br>WNT beta catenin signaling<br>Hedgehog signaling                                                                                 |
|                 | Single genes              | <i>PDGFRA</i>                                                                                                                                          |
| Stress response | Signatures                | Hypoxia<br>Apoptosis                                                                                                                                   |

[1] Computed by deconvolution Xcell

[2] Computed by signature

## Supplementary Table 12: Definition of the clinical outcomes

(Referred to **Supplementary Data 1: Clinic-pathological data of the ST TNBC cohort**)

| Clinical Outcome (1) | Name                                 | Definition (2)                                                  |                            |                                    |                                      |                                          |                    |                          |                      |
|----------------------|--------------------------------------|-----------------------------------------------------------------|----------------------------|------------------------------------|--------------------------------------|------------------------------------------|--------------------|--------------------------|----------------------|
|                      |                                      |                                                                 | Homolateral breast relapse | Local-Regional invasive recurrence | Contralateral invasive breast cancer | Other primary cancer (non-breast cancer) | Distant recurrence | Death from breast cancer | Death from any cause |
| <b>RFS</b>           | Recurrence-free survival             | Defined as the time interval from the date of diagnosis to: (3) | X                          | X                                  |                                      |                                          | X                  | X                        | X                    |
| <b>iBCFS</b>         | Invasive breast cancer-free survival | Defined as the time interval from the date of diagnosis to:     | X                          | X                                  | X                                    |                                          | X                  | X                        | X                    |
| <b>iDFS</b>          | Invasive disease-free survival       | Defined as the time interval from the date of diagnosis to:     | X                          | X                                  | X                                    | X                                        | X                  | X                        | X                    |
| <b>DRFS</b>          | Distant relapse-free survival        | Defined as the time interval from the date of diagnosis to:     |                            |                                    |                                      |                                          | X                  | X                        | X                    |
| <b>OS</b>            | Overall survival                     | Defined as the time interval from the date of diagnosis to:     |                            |                                    |                                      |                                          |                    | X                        | X                    |

(1) Censoring at 10 years of follow up

(2) Definition based on STEEP version 2.0 criteria<sup>8</sup>

(3) No censoring when contralateral relapse occurred

**Supplementary Table 13: List of the 30 genes related to TLS ST signature (referred to Figure 5d)**

| Genes (1)         | p_value    | Fold-Change | Name                                                                      | Category       | Subcategory                | Role                                                                                                                                                                                                                                                |
|-------------------|------------|-------------|---------------------------------------------------------------------------|----------------|----------------------------|-----------------------------------------------------------------------------------------------------------------------------------------------------------------------------------------------------------------------------------------------------|
| <i>RIPOR2</i>     | 3,2644E-12 | 2,04916914  | RHO Family Interacting Cell Polarization Regulator 2                      | Immune         | T cell                     | Lymphocyte T proliferation (inhibition of chemokine-induced T lymphocyte responses, such as cell adhesion, polarization and migration) and neutrophil polarization                                                                                  |
| <i>IL16</i>       | 1,2317E-11 | 2,06325624  | Interleukin 16                                                            | Immune         | Immune                     | Migratory response in CD4+ lymphocytes, monocytes, and eosinophils. Primes CD4+ T-cells for IL-2 and IL-15 responsiveness. Also induces T-lymphocyte expression of interleukin 2 receptor.                                                          |
| <i>POU2AF1</i>    | 5,5622E-11 | 2,11378752  | POU Class 2 Homeobox Associating Factor 1                                 | Nuclear/immune | Lymphoid nodule initiation | Transcription coactivator activity essential for the response of B-cells to antigens and required for the formation of germinal centers, Regulates IL6 expression in B cells                                                                        |
| <i>SELL</i>       | 1,1176E-14 | 2,16217582  | Selectin L                                                                | Immune         | Lymphoid nodule structure  | Selectin L, adherence of lymphocytes to endothelial cells of high endothelial venules in peripheral lymph nodes                                                                                                                                     |
| <i>ATP2A3</i>     | 5,0607E-10 | 2,22866006  | ATPase Sarcoplasmic/Endoplasmic Reticulum Ca <sup>2+</sup> Transporting 3 | Cellular       | Contraction                | One of the SERCA Ca(2+)-ATPases, which are intracellular pumps located in the sarcoplasmic or endoplasmic reticula of muscle cells.                                                                                                                 |
| <i>CD19</i>       | 3,9592E-15 | 2,22866673  | CD19 Molecule                                                             | Immune         | B cell                     | Coreceptor for the B-cell antigen receptor complex (BCR) on B-lymphocytes                                                                                                                                                                           |
| <i>RAC2</i>       | 2,4557E-10 | 2,24319162  | Rac Family Small GTPase 2                                                 | Immune         | Immune                     | Regulation of cellular responses, such as secretory processes, phagocytose of apoptotic cells and epithelial cell polarization                                                                                                                      |
| <i>CXCL13</i>     | 1,0856E-10 | 2,28695664  | C-X-C Motif Chemokine Ligand 13                                           | Immune         | Lymphoid nodule initiation | Chemotactic for B-lymphocytes but not for T-lymphocytes, monocytes and neutrophils; function in the homing of B lymphocytes to follicles                                                                                                            |
| <i>TCL1A</i>      | 2,3557E-16 | 2,36279363  | TCL1 Family AKT Coactivator A                                             | Cellular       | Cell survival              | Coactivator of the cell survival kinase AKT                                                                                                                                                                                                         |
| <i>AL928768.3</i> | 4,4635E-11 | 2,39659405  | Immunoglobulin Heavy Constant Alpha 1                                     | Immune         | Immunoglobulin             | IGHA1: Constant region of immunoglobulin heavy chains                                                                                                                                                                                               |
| <i>CCR7</i>       | 3,8737E-12 | 2,44743355  | C-C Motif Chemokine Receptor 7                                            | Immune         | Immune                     | Expressed in various lymphoid tissues and activates B and T lymphocyte; control the migration of memory T cells to inflamed tissues, as well as stimulate dendritic cell maturation                                                                 |
| <i>LINC00926</i>  | 7,4513E-12 | 2,52887166  | Long Intergenic Non-Protein Coding RNA 926                                | Immune         | B cell                     | Potential B cell-specific long non-coding RNA                                                                                                                                                                                                       |
| <i>CXCR5</i>      | 1,1068E-16 | 2,54287549  | C-X-C Motif Chemokine Receptor 5                                          | Immune         | Lymphoid nodule initiation | Cytokine receptor leading to B-cell migration into B-cell follicles                                                                                                                                                                                 |
| <i>RASGRP2</i>    | 3,7363E-13 | 2,55882536  | RAS Guanyl Releasing Protein 2                                            | Immune         | T cell                     | Calcium- and DAG-regulated nucleotide exchange factor specifically activating Rap through the exchange of bound GDP for GTP, aggregation of platelets and adhesion of T-lymphocytes and neutrophils probably through inside-out integrin activation |
| <i>NIBAN3</i>     | 2,7961E-15 | 2,58174917  | Protein Niban 3                                                           | Immune         | B cell                     | B-Cell Novel Protein 1                                                                                                                                                                                                                              |
| <i>IKZF3</i>      | 2,7797E-13 | 2,58204749  | IKAROS Family Zinc Finger 3                                               | Immune         | B cell                     | Transcription factor that plays an important role in the regulation of B-cell differentiation                                                                                                                                                       |
| <i>FCRLA</i>      | 3,9354E-17 | 2,59059435  | Fc Receptor Like A                                                        | Immune         | Immunoglobulin             | Development of B cells, mediation of the destruction of IgG-coated antigens and of cells induced by antibodies                                                                                                                                      |
| <i>BLK</i>        | 1,5114E-17 | 2,7086826   | BLK Proto-Oncogene, Src Family Tyrosine Kinase                            | Immune         | B cell                     | B-cell receptor signaling and B-cell development                                                                                                                                                                                                    |
| <i>TNFRSF13C</i>  | 4,2609E-18 | 2,75803266  | TNF Receptor Superfamily Member 13C                                       | Immune         | B cell                     | Survival of mature B-cells and B-cell response                                                                                                                                                                                                      |

|               |            |            |                                          |        |                            |                                                                                                                                                                                                        |
|---------------|------------|------------|------------------------------------------|--------|----------------------------|--------------------------------------------------------------------------------------------------------------------------------------------------------------------------------------------------------|
| <i>TCF7</i>   | 4,7982E-13 | 2,85385418 | Transcription Factor 7                   | Immune | T cell                     | T-cell lymphocyte differentiation                                                                                                                                                                      |
| <i>FCMR</i>   | 1,036E-14  | 2,87286465 | Fc Mu Receptor                           | Immune | Immunoglobulin             | Binding to the Fc region of immunoglobulins (Igs)                                                                                                                                                      |
| <i>VPREB3</i> | 9,7905E-17 | 3,17337177 | V-Set Pre-B Cell Surrogate Light Chain 3 | Immune | Immunoglobulin             | B-cell maturation and role in assembly of the pre-B cell receptor (pre-BCR)                                                                                                                            |
| <i>LTB</i>    | 1,1633E-16 | 3,24759913 | Lymphotoxin beta                         | Immune | Lymphoid nodule initiation | Type II membrane protein of the TNF family; inducer of the inflammatory response system and involved in normal development of lymphoid tissue; May play a specific role in immune response regulation. |
| <i>CD37</i>   | 3,5418E-16 | 3,33691287 | CD37 Molecule                            | Immune | B cell                     | Role in T-cell-B-cell interactions; member of the transmembrane 4 superfamily = tetraspanin family, cell-surface proteins                                                                              |
| <i>CD52</i>   | 5,0071E-12 | 3,36687226 | CD52 Molecule                            | Immune | Immune                     | Present on the surface of mature lymphocytes, role of anti-adhesion allowing cells to freely move around                                                                                               |
| <i>CD22</i>   | 1,2008E-16 | 3,39315468 | CD22 Molecule                            | Immune | B cell                     | B cell activation, negative regulation of B cell receptor signaling pathway and localization of B-cells in lymphoid tissues                                                                            |
| <i>CD79A</i>  | 2,0142E-18 | 5,17935038 | CD79a Molecule                           | Immune | B cell                     | Initiation of the signal transduction cascade activated by binding of antigen to the B-cell antigen receptor complex                                                                                   |
| <i>CD79B</i>  | 9,5002E-20 | 5,67599876 | CD79b Molecule                           | Immune | B cell                     | Initiation of the signal transduction cascade activated by binding of antigen to the B-cell antigen receptor complex                                                                                   |
| <i>MS4A1</i>  | 4,5456E-16 | 5,78090014 | Membrane Spanning 4-Domains A1           | Immune | B cell                     | Development, differentiation, and activation of B-lymphocytes                                                                                                                                          |
| <i>CCL19</i>  | 1,47E-12   | 7,30617032 | C-C Motif Chemokine Ligand 19            | Immune | Lymphoid nodule initiation | T-cell and B-cell migration to secondary lymphoid organs                                                                                                                                               |

(1) Genes selected based on the cut off of  $p < 10^{-9}$  and Fold-Change  $> 2$  which are the highest p value and the lowest Fold-Change from all the pairs of comparison (ie. TLS vs lymphocytes, TLS vs tumor, TLS vs vessel...)

## Supplementary Table 14: Morphological and molecular characteristics of the fourteen megaclusters

(referred to **Figure 7c**, **Supplementary Figures 11b-18**)

| Megaclusters | Main TNBC molecular subtypes [1] | Annotations [2]/clinical data     | Signatures [1]                                                                                                                                                                                                          |                                                                                                                                                                                                                                                             | xCells [1]                                                                                |                                                                                                  | Single genes [1]                                                                                                                                                                                                                                                                                               |                                                                                 |
|--------------|----------------------------------|-----------------------------------|-------------------------------------------------------------------------------------------------------------------------------------------------------------------------------------------------------------------------|-------------------------------------------------------------------------------------------------------------------------------------------------------------------------------------------------------------------------------------------------------------|-------------------------------------------------------------------------------------------|--------------------------------------------------------------------------------------------------|----------------------------------------------------------------------------------------------------------------------------------------------------------------------------------------------------------------------------------------------------------------------------------------------------------------|---------------------------------------------------------------------------------|
|              |                                  |                                   | ↑                                                                                                                                                                                                                       | ↓                                                                                                                                                                                                                                                           | ↑                                                                                         | ↓                                                                                                | ↑                                                                                                                                                                                                                                                                                                              | ↓                                                                               |
| <b>MC 1</b>  | BL                               | Tumor>stroma                      | NOTCH sig, mTORC1 sig, Androgen response, Estrogen late/early, hedgehog, TGFbeta sig, wnt sig, heme/fatty acid metabolism, oxydative phospho, Proliferation sig (G2M, CIN70, GENE70, GGI, E2F, mitotic spindle, Myc v1) | Apoptosis, immune sig (Immune 1/2, allograft rej, coag, IL6 sig, IFNa/g sig, Trm, TLS, TAM) EMT, angiogenesis, myogenesis, Parpi7, VCPredTN, angiogenesis, Stroma1/2, ecm-myCAF, TGFb-myCAF, wound-myCAF, detox-iCAF, IL-iCAF, normal fibroblast, IFNg-iCAF | CD4 memory T cell, Th2, CD8 naive T cells, smooth muscle, CLP, preadipocytes, neutrophils | B cells, Th1, NK/NKT, DC, macrophages, endothelial cells, fibroblasts, pericytes                 | HRD genes (RAD51D/C, PTEN, PALB2, NBN, FANCM, CDK12 BRIP1, BRCA2/1, BARD1), cell cycling genes (PLK4, TTK, MYC, CDKN2A/C, CDK2/4, CCNE1), VEGFA, KDR, methylation genes (HDAC1, DNMT3B/A, TRDMT1, DNMT1), MMR genes (PMS1, MSH6, MSH2, MLH1, POLH), PDGFC, PIK3CA, mTOR, ERBB2, LIV1, 5T4, Trop2, GPNMB, B7-H4 | Immune genes (TLR7, PD1, LAG3, TIM3, GTR, FOXP3, CTLA4, ADA, CCL5, CD134) VEGFB |
| <b>MC 2</b>  | BL                               | Tumor>stroma                      | PARPi7, DNA repair, mTORC1 sig, Proliferation sig (G2M, CIN70, GGI, E2F, Myc v1/2) Glycolysis                                                                                                                           | TGFbeta sig, apoptosis, all immune sig, angiogenesis, EMT, ecm-myCAF, TGFb-myCAF, wound-myCAF, detox-iCAF, IL-iCAF, normal fibroblast, IFNg-iCAF, VCPredTN                                                                                                  | Neutrophils, smooth muscle, CLP, epithelial cells                                         | B cells, CD4/CD8 T cells, DC, macrophages, endothelial cells, fibroblasts, pericytes, adipocytes | Cell cycling genes (PLK4, TTK, MYC, CDKN2A, CDK4, CDK2, CCNE1), VEGFA, TF, ERBB2/3, AKT1/mTOR, Trop2, NECTIN4, B7-H4, CD47, methyl genes (HDAC1, DNMT3B/A, TRDMT1)                                                                                                                                             | ATM, ESR1, AR, immune genes, NTRK2, PDGFRA/B, KDR, FLT1/4                       |
| <b>MC 3</b>  | M, BL                            | Stroma > tumor                    | NOTCH sig, PARPi7, Proliferation sig (G2M, CIN70, GENE70, GGI, E2F, mitotic spindle, Myc v1/2), hypoxia, glycolysis, myogenesis, apical junction, DNA repair                                                            | Immune sig (Immune 1/2, allograft rej, IL2/6 sig, IFNa/g sig, Trm, TLS, TAM), VCPredTN, ecm-myCAF, wound-myCAF, detox-iCAF, IL-iCAF, normal fibroblast, IFNg-iCAF                                                                                           | Smooth muscle, epithelial cells                                                           | B cells, CD4/CD8 T cells, DC, macrophages, endothelial cells, fibroblasts, adipocytes, basophils | Cell cycling genes (PLK4, TTK, MYC, CDKN2A/C, CDK2, CCNE1, CCND1), VEGFA, VEGFB, mTOR/AKT1, ERBB2, LIV1, 5T4, Trop2, NECTIN4, B7-H4, B7-H3, CD47, CD73                                                                                                                                                         | ATM, ESR1, AR, RB1, immune genes                                                |
| <b>MC 4</b>  | M                                | Stroma > tumor, lactiferous ducts | Myc v1                                                                                                                                                                                                                  | PI3K/AKT/mTOR and mTORC1 sig, apoptosis/hypoxia, metabolism (heme, bile acid, xenobiotic), immune sig, angiogenesis, VCPredTN, EMT, ecm-myCAF, TGFb-myCAF, wound-myCAF, IL-iCAF, IFNg-iCAF                                                                  | Myocytes, smooth muscle, CLP, preadipocyte, neurons                                       | B cells, CD4/CD8 T cells, macrophages, pDC/aDC, NKT, endothelial cells, MSC                      | MYC, ERBB2, PSMA, B7-H4                                                                                                                                                                                                                                                                                        | ESR1, AR, ATM, CDKN2A, FLT1/4, VEGFB, PDGFRB, 5T4, GPNMB, immune genes          |

|             |        |                              |                                                                                                                                                                                                                                                                                                   |                                                                                                                                   |                                                                                                                       |                                                                                                                    |                                                                                                                                                                                                                               |                                                                                                                                                                                         |
|-------------|--------|------------------------------|---------------------------------------------------------------------------------------------------------------------------------------------------------------------------------------------------------------------------------------------------------------------------------------------------|-----------------------------------------------------------------------------------------------------------------------------------|-----------------------------------------------------------------------------------------------------------------------|--------------------------------------------------------------------------------------------------------------------|-------------------------------------------------------------------------------------------------------------------------------------------------------------------------------------------------------------------------------|-----------------------------------------------------------------------------------------------------------------------------------------------------------------------------------------|
| <b>MC 5</b> | BL, IM | Tumor >stroma > lymphocytes  | PI3K/AKT/mTOR and mTORC1 sig, proliferation sig (G2M, CIN70, GENE70, GGI, E2F, Myc v1/2), reactive oxygen sp path, metabolism (heme/fatty acid), glycolysis, oxydative phosphorylation, immune sig (Immune2, TLS Lund, IFNa/g res, Trm), adipogenesis, DNA repair                                 | TGFbeta sig, Hedgehog sig, hypoxia, angiogenesis, EMT, ecm-myCAF, TGFb-myCAF, wound-myCAF, detox-iCAF, IL-iCAF, normal fibroblast | Th1/Th2, CD8 naive T cells, smooth muscle, CLP, preadipocytes                                                         | CD4 naive T cells, Tregs, NKT, iDC, monocytes, endothelial cells, fibroblasts, pericytes, MSC, adipocytes, neurons | Cell cycling genes (PLK4, TTK, MYC, CDKN2A, CDK2/4/6, CCNE1), HDAC1, mTOR, ERBB3, LIV-1, Trop2, NECTIN4, immune genes (LAG3, TIGIT, PD-1, PD-L1, IDO1, TIM3, DCIR, CTLA4, CD47, TLR2, TLR3, ICOS, CXCR4, CD40, IFNAR1/IFNGR1) | AR, FLT4, VEGFB, PDGFRA/B, immune genes (CD73, IFNAR1, GTR, CXCL12, B7-H3)                                                                                                              |
| <b>MC 6</b> | M, BL  | Tumor >stroma > lymphocytes  | NOTCH sig, Parpi7, DNA repair, PI3K/AKT/mTOR and mTORC1 sig, hormonal path (androgen res, estrogen early/late), wnt sig, prolif sig (G2M, CIN70, GENE70, GGI, E2F, mitotic spindle), apoptosis/hypoxia/glycolysis, metabolism (heme/xenobiotic/cholesterol), complement, adipogenesis, peroxisome | AR gene, TLS cabrita                                                                                                              | Class switched memory B cells, NKT, basophils, epithelial cells                                                       | B cells/pro B cells, memory/naive CD4 T cells, CD8 naive T cells, monocytes, endothelial cells, pericytes          | Cell cycling genes(PLK4, TTK, MYC, CDKN2A/C, CCNE1), NTRK3, PDGFC, PIK3CA/AKT/mTOR, LIV1, GPNMB, immune genes (LAG3, IFNGR1, IDO1, PDL1, TLR2/3)                                                                              | BRCA1, RAD50, RAD51D, AR, VEGFB, DNMT3A, ERBB3, immune genes (IFNAR1, CD39, ADA)                                                                                                        |
| <b>MC 7</b> | IM     | Stroma > tumor > lymphocytes | DNA repair, VCpredTN, Parpi7, KRAS sig, immune sig (Immune1/2, TLS, allograft rej, complement, IL2/6 sig, IFNa/g sig, Trm, TAM), apoptosis, IFNg-iCAF                                                                                                                                             | Androgen response, TGFbeta sig, protein secretion, GENE70                                                                         | Th1, NKT, DCs, basophils, macrophages, memory B cells, pericytes, epithelial cells                                    | Mast cells, myocytes, smooth muscle, CLP, neurons, preadipocytes                                                   | Cell cycling genes (CDKN2A, CCND1), immune genes (TIGIT, PD1, LAG3, IDO1, ICOS, TIM3, GTR, DCIR, CTLA4, CD40, CCL5)                                                                                                           | HRD genes (RAD50, PTEN, PALB2, NBN, FANCM, EMSY, CDK12, BRCA2, BARD1, ATR, ATM), RB1, VEGFA, PIK3CA, PDGFC, MMR genes (PMS1, MSH6, MSH3, MLH3, MLH1), methylation genes (TRDMT1, DNMT1) |
| <b>MC 8</b> | LAR    | Stroma > tumor, in situ      | PI3K/AKT/mTOR and mTORC1 sig, hormonal path (AR gene, androgen res, estrogen late/early), metabolism (heme/fatty acid/xenobiotic), glycolysis, adipogenesis                                                                                                                                       | Immune sig, detox-iCAF, IL-iCAF, normal fibroblast, IFNg-iCAF, Wnt sig, hedgehog sig, angiogenesis, EMT, GENE70                   | Smooth muscle, epithelial cells                                                                                       | B cells, CD4/CD8 T cells, DC, macrophages, endothelial cells, pericytes                                            | AR, RB1, PDGFC, AKT1/mTOR, ERBB2/3, EGFR, LIV1, 5T4, Trop2, NECTIN4                                                                                                                                                           | Immune genes, NTRK2/3, PDGFRA, TF, cell cycling genes (MYC, CDKN2A)                                                                                                                     |
| <b>MC 9</b> | IM     | Stroma > lymphocytes, TLS    | CAF, KRAS sig, apoptosis, all immune sig, TGFb-myCAF, wound-myCAF, detox-iCAF, IL-iCAF, normal fibroblast, IFNg-iCAF                                                                                                                                                                              | NOTCH sig, hormonal path, proliferation sig, hypoxia, glycolysis, adipogenesis                                                    | All B cells, plasma cells, CD4/CD8 T cells, all DCs, basophils, macrophages, mast cells, monocytes, endothelial cells | NK cells, myocytes, smooth muscle, epithelial cells, neurons                                                       | Immune genes                                                                                                                                                                                                                  | HRD genes, cell cycling genes, VEGFA, PIK3CA, PDGFC, ERBB2/3, EGFR, B7-H4, B7-H3                                                                                                        |

|              |         |                                           |                                                                                                                                                                                                  |                                                                                                                              |                                                                                                                                              |                                                                                             |                                                                                                                                                                                      |                                                                                                                                         |
|--------------|---------|-------------------------------------------|--------------------------------------------------------------------------------------------------------------------------------------------------------------------------------------------------|------------------------------------------------------------------------------------------------------------------------------|----------------------------------------------------------------------------------------------------------------------------------------------|---------------------------------------------------------------------------------------------|--------------------------------------------------------------------------------------------------------------------------------------------------------------------------------------|-----------------------------------------------------------------------------------------------------------------------------------------|
| <b>MC 10</b> | MSL, IM | Stroma>> lymphocytes, fat tissue, vessels | Stroma1/2, CAF, TGFb-myCAF, wound-myCAF, detox-iCAF, IL-iCAF, normal fibroblast, IFNg-iCAF, KRAS sig, all immune sig, apoptosis, angiogenesis, EMT, myogenesis, apical junction                  | mTORC1 sig, proliferation sig, hormonal path, hypoxia, glycolysis, oxydative phospho, adipogenesis/fatty acid metab          | B cells, CD4 naive T cells, plasma cells, CD8 T cells, all DCs, macrophages, endothelial cells, fibroblasts, pericytes, adipocytes, MSC, CMP | Th2, smooth muscle, CLP, epithelial cells                                                   | ATM, ESR1/AR, PDGFRA/B, immune genes                                                                                                                                                 | HRD genes (TP53, RAD51C, PTEN, NBN, FANCA, CHEK2, BRIP1), cell cycling genes, methylation genes, PDGFC, PIK3CA/AKT1/mTOR, ERBB2/3, EGFR |
| <b>MC 11</b> | M, MSL  | Stroma                                    | Stroma1/2, CAF, NOTCH sig, hedgehog sig, KRAS sig, TGFbeta sig, apoptosis, hypoxia, coagulation, angiogenesis, EMT, apical junction                                                              | mTORC1 sig, proliferation sig, TLS Lund, fatty acid/heme metabolism                                                          | NKT, macrophages, endothelial cells, fibroblasts, pericytes, MSC                                                                             | CD4 memory T Cells, Th2, CD8 T cells, mast cells, smooth muscle, CLP, preadipocytes         | VEGFB/KDR/FLT1-4, PDGFRA/B, immune genes (CD73, GITR, B7-H3, CD134)                                                                                                                  | HRD genes, cell cycling genes, immune genes (IFNGR1, IFNAR2, IDO1, CXCR4, CD47, CD96, TLR3), MMR genes                                  |
| <b>MC 12</b> | M       | Stroma > necrosis                         | Mitotic spindle, hedgehog sig, myogenesis, apical junction                                                                                                                                       | NOTCH sig, reactive oxygen sp path, apoptosis, metabolism (fatty acid, heme, xenobiotic), immune sig, adipogenesis, VCPredTN | Fibroblasts, myocytes, pericytes                                                                                                             | Memory/naive B cells, CD4 Tem, Th1, CD8 Tcm, DCs, macrophages, smooth muscle, preadipocytes | HRD genes (RAD51D, RAD50, EMSY, CDK12, BRIP1, BRCA2/1, ATR, ATM), VEGFA, NTRK3, PDGFC, ERBB3, MMR genes (PMS1-2, MSH3, MLH3), B7-H3, IFNAR1, methylation genes (TRDMT1, DNMT1)       | Cycling genes (CDK2/4, CCNE1), mTOR/AKT1, immune genes                                                                                  |
| <b>MC 13</b> | M, MSL  | Stroma> fat tissue, necrosis              | CAF, AR gene, androgen res, hedgehog sig, mitotic spindle, wound-myCAF, detox-iCAF, normal fibroblast                                                                                            | Proliferation sig, NOTCH sig, mTORC1 sig, glycolysis, oxydative phospho, TLS lund, Immune1/2, Trm, VCPredTN, Parpi7          | CD4 memory T cells, T regs, mast cells, myocytes, CLP, adipocytes                                                                            | Th1, NK cells, CD8 Tem, basophils, macrophages, MSC, epithelial cells                       | HRD genes (RAD50, EMSY, CDK12, BRCA2, BRCA1, BARD1, ATR, ATM), ESR1, AR, RB1, VEGFA/KDR/FLT1, PIK3CA, ERBB3, EGFR, MMR genes (PMS1-2, MSH3, MLH3), methylation genes (TRDMT1, DNMT1) | Immune genes, CCNE1, CDKN2A, VEGFB, AKT1,                                                                                               |
| <b>MC 14</b> | MSL     | Stroma>fat tissue, vessels                | Stroma1/2, CAF, TGFb-myCAF, wound-myCAF, detox-iCAF, IL-iCAF, normal fibroblast, IFNg-iCAF, Hedgehog sig, KRAS sig, TGFbeta sig, apoptosis, hypoxia, immune sig, angiogenesis, EMT, adipogenesis | mTORC1 sig, estrogen late, proliferation sig, glycolysis, oxydative phospho                                                  | B cells, memory B cells, naive/memory CD4 T cells, DCs, monocytes, macrophages, endothelial cells, fibroblasts, pericytes, adipocytes        | Plasma cells, Th1, basophils, epithelial cells                                              | HRD genes, AR, RB1, VEGFB/KDR/FLT1-4, PDGFC/PDGFRAB, PIK3CA, GPNMB, immune genes (CD73, IL2RA, TIM3, CD39, DCIR, CXCL12, CSF1R, B7-H3, CD134, ADA)                                   | CDKN2A, CCNE1, PLK4, ERBB2/3, B7-H4                                                                                                     |

| Megaclusters | Survival - ST TNBC pseudobulk [3] | Survival - ST TNBC bulk [4] | Survival - METABRIC [5] | Survival - SCAN-B [6] | 3 cohorts (ST, METABRIC, SCAN-B) [7] | Main characteristics                                                                          | Summary                               |
|--------------|-----------------------------------|-----------------------------|-------------------------|-----------------------|--------------------------------------|-----------------------------------------------------------------------------------------------|---------------------------------------|
| <b>MC 1</b>  | /                                 | /                           | /                       | /                     | /                                    | High proliferation, NOTCH, Wnt, TGFbeta, immune depletion                                     | Proliferation, Wnt, TGF beta          |
| <b>MC 2</b>  | /                                 | iBCFS↓                      | /                       | /                     | iBCFS, DRFS↓                         | High proliferation, glycolysis, immune depletion, DNA repair<br>Neutrophils, epithelial cells | Proliferation, glycolysis, DNA repair |



|              |             |                           |   |     |                  |                                                                                                               |                                                                    |
|--------------|-------------|---------------------------|---|-----|------------------|---------------------------------------------------------------------------------------------------------------|--------------------------------------------------------------------|
| <b>MC 3</b>  | /           | /                         | / | /   | /                | High proliferation, hypoxia, glycolysis, NOTCH, immune depletion, DNA repair<br>Epithelial cells<br>CD73 gene | Proliferation, hypoxia, glycolysis, DNA repair                     |
| <b>MC 4</b>  | /           | /                         | / | /   | /                | Low PI3K/AKT/mTOR and low metabolism, immune depletion, MYC target v1<br>Neurons, smooth muscle               | MYC target v1                                                      |
| <b>MC 5</b>  | RFS, iBCFS↑ | RFS, iBCFS, DRFS, OS<br>↑ | / | OS↑ | iBCFS, DRFS, OS↑ | High PI3K/AKT/mTOR, proliferation and immune activation<br>CD8 naive T cells                                  | PI3K/AKT/mTOR, proliferation, immune activation                    |
| <b>MC 6</b>  | /           | RFS ↑                     | / | /   | /                | High PI3K/AKT/mTOR, NOTCH, hormone related pathway, proliferation, hypoxia, apoptosis                         | PI3K/AKT/mTOR, proliferation, hormonal pathway, hypoxia, apoptosis |
| <b>MC 7</b>  | /           | iBCFS ↑                   | / | /   | /                | Immune activation, response to PARPi, apoptosis                                                               | Immune activation, response to PARPi                               |
| <b>MC 8</b>  | /           | /                         | / | /   | /                | High PI3K/AKT/mTOR, hormone related pathway, metabolism, adipogenesis, immune depletion                       | PI3K/AKT/mTOR, hormonal and metabolic pathways, adipogenesis       |
| <b>MC 9</b>  | /           | /                         | / | OS↑ | iBCFS, DRFS, OS↑ | Immune activation, apoptosis, low angiogenesis, CAF                                                           | Immune activation, CAF, apoptosis                                  |
| <b>MC 10</b> | /           | /                         | / | /   | /                | Stroma and immune activation, CAF, angiogenesis, EMT                                                          | CAF, immune activation, angiogenesis                               |
| <b>MC 11</b> | /           | /                         | / | OS↓ | iBCFS, DRFS, OS↓ | Stroma activation, CAF, TGF beta, Hedgehog, high angiogenesis, EMT<br>CD73                                    | CAF, angiogenesis, TGF beta, Hedgehog                              |
| <b>MC 12</b> | /           | /                         | / | /   | iBCFS↓           | High myogenesis, low metabolism, Hedgehog, immune depletion<br>Fibroblasts, myocytes                          | Myogenesis, Hedgehog                                               |
| <b>MC 13</b> | /           | /                         | / | OS↑ | iBCFS↑           | Stroma activation, CAF, Hedgehog, androgen response                                                           | CAF, Hedgehog, androgen response                                   |
| <b>MC 14</b> | /           | /                         | / | /   | iBCFS↑           | Stroma activation, CAF, TGFbeta signaling, angiogenesis, adipogenesis, EMT, immune activation                 | CAF, immune activation, angiogenesis, adipogenesis                 |

[1] Assessment of TNBC molecular subtypes, signatures, xCells enrichment score and specific gene expressions based on pseudobulk of all per-spot deconvoluted prototypes/individual clusters belonging to the same megacluster

[2] Means of contributions (%) of morphological annotations based on prototypes/individual clusters (not deconvoluted) belonging to the same megacluster

[3] Survival analysis based on the contribution (%) of per-spot deconvoluted megaclusters (as continuous variables): forest plot with univariate analysis where only FDR <0.05 are reported

[4] Survival analysis based on the contribution (%) of deconvoluted megaclusters (as continuous variables) from RNA bulk: forest plot with univariate analysis where only FDR <0.05 are reported

[5] Survival analysis based on the contribution (%) of deconvoluted megaclusters (as continuous variables) from RNA bulk: forest plot with univariate analysis where only FDR <0.05 are reported

[6] Survival analysis based on the contribution (%) of deconvoluted megaclusters (as continuous variables) from RNA bulk: forest plot with univariate analysis where only FDR <0.05 are reported

[7] Survival analysis based on the contribution (%) of deconvoluted megaclusters (as continuous variables) from RNA bulk from 3 cohorts corrected for study: forest plot with univariate analysis where only FDR <0.05 are reported

NB. Multivariate analysis controlled for (age (as continuous variable), lympho node (>0) and tumor size (>20 mm for METABRIC and SCAN-B, T>1 vs T=1 pour ST cohort))

## Supplementary Table 15: Morphological and molecular characteristics of the nine spatial archetypes

(referred to **Figure 8e-f**, **Figure 9**; **Supplementary Figures 19b-33**)

| Spatial archetypes | Main TNBC molecular subtypes [1] | Main MC [2] | Annotation/ Clinic-pathological [2] | Signatures [1]                                                                                                                                                   | xCells [1]                                                                                                        | Single genes [1]                                                                                                                      | Survival - ST TNBC pseudo bulk [3] | Survival - ST TNBC bulk [4] | Survival - METABRIC [5] | Survival - SCAN-B [6] | 3 cohorts (ST, METABRIC, SCAN-B) [7] | Summary                                                                                      |
|--------------------|----------------------------------|-------------|-------------------------------------|------------------------------------------------------------------------------------------------------------------------------------------------------------------|-------------------------------------------------------------------------------------------------------------------|---------------------------------------------------------------------------------------------------------------------------------------|------------------------------------|-----------------------------|-------------------------|-----------------------|--------------------------------------|----------------------------------------------------------------------------------------------|
| SA1                | IM, MSL                          | MCs 6, 10   | /                                   | High KRAS signaling, high immune signatures including TLS signature, high HRD signature, high IFNg-iCAF                                                          | Enriched by DC                                                                                                    | High immune genes including CD27, PD1, VISTA, CD134, CSF1R                                                                            | /                                  | /                           | /                       | /                     |                                      | High immune with TLS sig, DNA repair deficiency, KRAS-dependent                              |
| SA2                | BL                               | MC2         | /                                   | Low stroma signatures with low EMT, higher proliferation in METABRIC and SCAN-B                                                                                  | Enriched by pro B cells                                                                                           | High ERBB3, low NTRK2 and PDGFRA/B                                                                                                    | /                                  | /                           | /                       | /                     |                                      | High proliferation and high ERBB3 expression                                                 |
| SA3                | IM                               | MC7         | Medullary, TILs,                    | High TAM and Trm signatures, high Myc v2 target, low Stroma 1 signature                                                                                          | Enriched by pDC, depleted by endothelial cells                                                                    | High immune genes including CCL5, CD40, TIM3, IDO1 and LAG3                                                                           | /                                  | /                           | /                       | /                     |                                      | High proliferation, high immune with PD-L1 expression                                        |
| SA4                | IM                               | MC5         | High Ki67, TILs, CD20               | High VCpredTN signature, high immune signatures including TLS, Trm and TAM, high IFNg-iCAF Low Stroma, EMT and myogenesis                                        | Enriched by B cells including memory, pro B cells, plasma cells, Th2, CD8 naive and Tcm, aDC and pDC, macrophages | High immune genes including PD-L1, CTLA4, ICOS, LAG3, PD1, TIGIT, TIM3, ADA                                                           | OS, DRFS, iBCFS, RFS ↑             | /                           | /                       | /                     | OS, DRFS, iBCFS ↑                    | High immune with TLS sig and PD-L1 expression, DNA repair deficiency                         |
| SA5                | LAR                              | MC8         | Low Ki67, grade and TILs            | High stroma, high adipogenesis, high AR/ESR1/ER pathway, high metabolisms, high wound-myCAF, detox-iCAF and normal fibroblast Low proliferation                  | Enriched by adipocytes Depleted by pro B cells and Th2                                                            | High AR, ESR1 and AKT1 Low immune genes including IFNAR2, LAG3, B7-H4; low cell-cycling genes including CDKN2A, CCNE1, MYC, TTK, PLK4 | /                                  | /                           | /                       | /                     |                                      | LAR-enriched, high metabolic pathways, high ERBB2 expression                                 |
| SA6                | M, MSL                           | MC1         | /                                   | High TGFb signature, protein secretion                                                                                                                           | Enriched by smooth muscle, depleted by Th1                                                                        | High PDGFRA, PDGFC, KDR, FLT1, CDKN2C                                                                                                 | /                                  | /                           | /                       | /                     | DRFS ↑                               | High stromal, high proliferation and high PDGF expression                                    |
| SA7                | M                                | MC3         | LowTILs and CD20                    | High stroma with TGFb sig, EMT, myogenesis and apical junction, high hypoxia, glycolysis and angiogenesis in ST bulk, METABRIC and SCAN-B Low immune 1 signature | Depleted by basophils (+ almost immune cells in METABRIC and SCAN-B)                                              | High CD73 in ST bulk and SCAN-B, high VEGFA in METABRIC and SCAN-B, high VEGFB in ST PB and SCAN-B                                    | OS, DRFS ↑                         | OS, DRFS↑                   | /                       | /                     |                                      | High stromal, high EMT, high angiogenesis and adenosine pathway-enriched, high proliferation |

|            |       |     |                   |                                                                        |                                                        |                                                                                           |   |   |   |   |                      |                                     |
|------------|-------|-----|-------------------|------------------------------------------------------------------------|--------------------------------------------------------|-------------------------------------------------------------------------------------------|---|---|---|---|----------------------|-------------------------------------|
| <b>SA8</b> | M, BL | MC2 | Low TILs          | Low HRD signature, low immune including TLS and TAM                    | Depleted by cDC, B cells and CD8 T cells               | High NECTIN4<br>Low immune genes including CCL5, CD27, CD40, TIGIT, ICOS, CTLA4           | / | / | / | / | OS, DRFS, iBCFS<br>↓ | Low immune, high NECTIN4 expression |
| <b>SA9</b> | M     | MC4 | Low TILs and CD20 | Low HRD signature, low PI3K/AKT/mTOR signaling, low immune 2 signature | Depleted by B cells, plasma cells, macrophages and aDC | High NTRK2 (in ST bulk, METABRIC and SCAN-B)<br>Low immune genes including CCL5 and TIGIT | / | / | / | / |                      | High stromal and low immune         |

[1] Summary of characterization of spatial archetypes across 4 datasets: pseudobulk ST, bulk ST, METABRIC and SCAN-B

[2] Summary of characterization of spatial archetypes on pseudobulk ST only

[3] Survival data based on spatial archetypes from ST TNBC pseudobulk based on the contribution (%) of per-spot deconvoluted megaclusters (as continuous variables): forest plot with univariate analysis where only FDR <0.05 are reported

[4] Survival data based on spatial archetypes deconvoluted from ST TNBC bulk: forest plot with univariate analysis where only FDR <0.05 are reported

[5] Survival data based on spatial archetypes deconvoluted from METABRIC data (TNBC patients): forest plot with univariate analysis where only FDR <0.05 are reported

[6] Survival data based on spatial archetypes deconvoluted from SCAN-B data (TNBC patients): forest plot with univariate analysis where only FDR <0.05 are reported

[7] Survival data based on spatial archetypes deconvoluted from RNA bulk from 3 cohorts corrected for study: forest plot with univariate analysis where only FDR <0.05 are reported

**Supplementary Table 16: List of selection of molecular features relevant to characterize the spatial archetypes**

(referred to **Figure 8e** and **Supplementary Figures 20-21**)

| Main function   | Type of molecular features | List of selected molecular features                                                                                              |
|-----------------|----------------------------|----------------------------------------------------------------------------------------------------------------------------------|
| Immune          | Signatures                 | Complement<br>IL6 JAK STAT3 signaling<br>IL2 STAT5 signaling<br>Interferon gamma response<br>Interferon alpha response<br>TLS ST |
|                 | Single genes               | <i>CD73</i>                                                                                                                      |
|                 | Cell types                 | TAM [1]<br>Trm [1]                                                                                                               |
| Stroma          | Signatures                 | Adipogenesis<br>Epithelial mesenchymal transition<br>Stroma1<br>Stroma2                                                          |
|                 | Single genes               | <i>VEGFB</i><br><i>PDGFRA</i><br><i>PDGFC</i>                                                                                    |
|                 | Cell types                 | Adipocytes [2]<br>Fibroblasts [2]                                                                                                |
| Oncogenic       | Signatures                 | Myc targets v1<br>Myc targets v2<br>GGI<br>Mitotic spindle<br>KRAS signaling<br>Androgen response                                |
|                 | Single genes               | <i>AR</i><br><i>ESR1</i><br><i>ERBB3</i><br><i>NECTIN4</i>                                                                       |
| Stress response | Signatures                 | VCpredTN<br>Apoptosis                                                                                                            |
| Metabolism      | Signatures                 | Fatty acid metabolism<br>Bile acid metabolism<br>Xenobiotic metabolism<br>Peroxisome                                             |

[1] Computed as signatures by GSVA

[2] Computed by xCell deconvolution

## SUPPLEMENTARY REFERENCES

1. Andersson, A. *et al.* Spatial deconvolution of HER2-positive breast cancer delineates tumor-associated cell type interactions. *Nat. Commun.* **12**, 6012 (2021).
2. Cabrita, R. *et al.* Tertiary lymphoid structures improve immunotherapy and survival in melanoma. *Nature* **577**, 561–565 (2020).
3. Meylan, M. Tertiary lymphoid structures generate and propagate anti-tumor antibody-producing plasma cells in renal cell cancer. *Immunity* **55**, 527-541 5 (2022).
4. Wolf, D. M. Redefining breast cancer subtypes to guide treatment prioritization and maximize response: Predictive biomarkers across 10 cancer therapies. *Cancer Cell* **40**, 609-623 6 (2022).
5. Bareche, Y. Leveraging big data of immune checkpoint blockade response identifies novel potential targets. *Ann Oncol* **33**, 1304–1317 (2022).
6. METABRIC Group *et al.* The genomic and transcriptomic architecture of 2,000 breast tumours reveals novel subgroups. *Nature* **486**, 346–352 (2012).
7. Staaf, J. RNA sequencing-based single sample predictors of molecular subtype and risk of recurrence for clinical assessment of early-stage breast cancer. *Npj Breast Cancer* **8**, 94 (2022).
8. Tolaney, S. M. Updated Standardized Definitions for Efficacy End Points (STEEP) in Adjuvant Breast Cancer Clinical Trials: STEEP Version 2.0. *J Clin Oncol* **39**, 2720–2731 (2021).
